# Supplementary material
Source: publisher site journal article supplement (https://www.degruyterbrill.com/publication/isbn/9783111437453/downloadAsset/9783111437453_Foliensatz%20f%C3%BCr%20Dozenten.pdf)
Supplement: Supplementary file 1 [file 9783111437453_Foliensatz%20f%C3%BCr%20Dozenten.pdf]

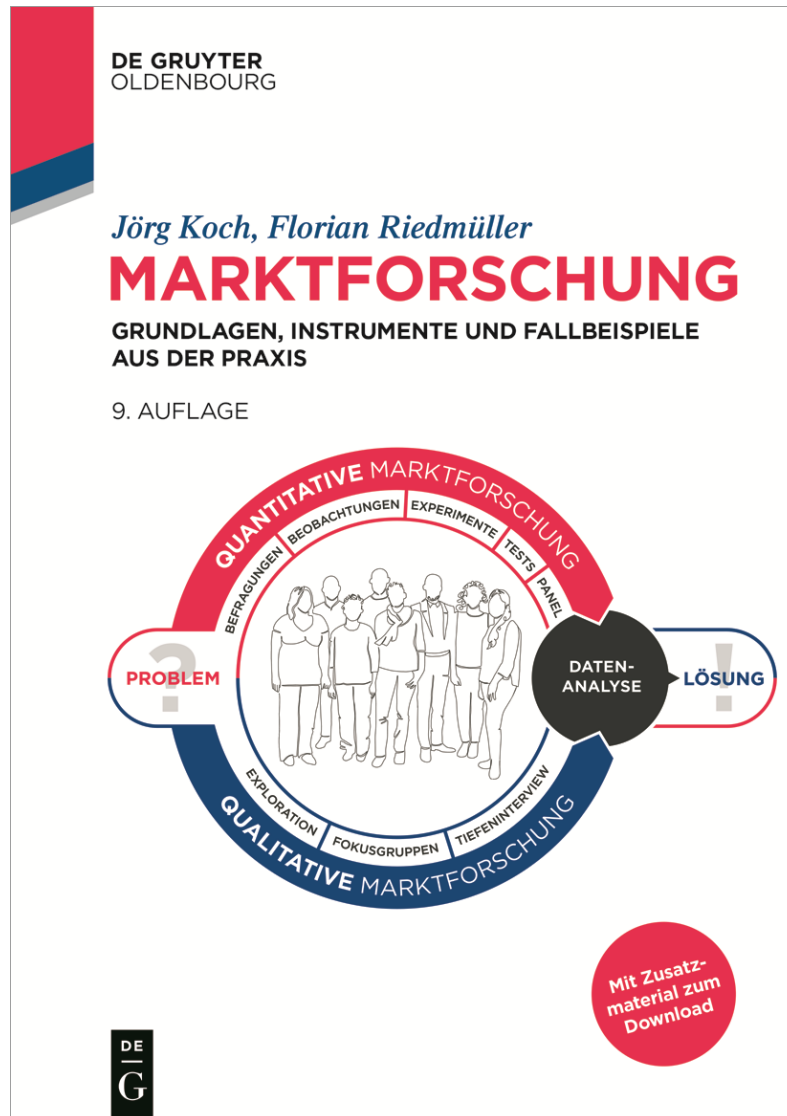

# Präsentationsfolien zum Buch

Das Lehrbuch von Prof. Dr. Jörg Koch und Prof. Dr. Florian Riedmüller vermittelt in anwendungsorientierter Form Begriffe und Methoden der Marktforschung.

Das Buch ist aufgeteilt in drei Teile: Methodische Grundlagen, praktische Anwendungsfelder und quantitative Analysen im Bereich der Marktforschung.

Die vollständig überarbeitete Neuauflage greift aktuelle Aspekte der künstlichen Intelligenz und der Digitalisierung in der Marktforschung auf und bietet für Dozenten und Studierende zahlreiche digitale Erweiterungen.

[Link zu begleitenden youtube-Kanal](#)

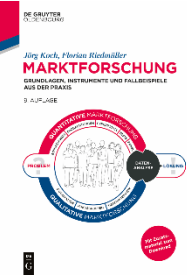

Buch S. 3

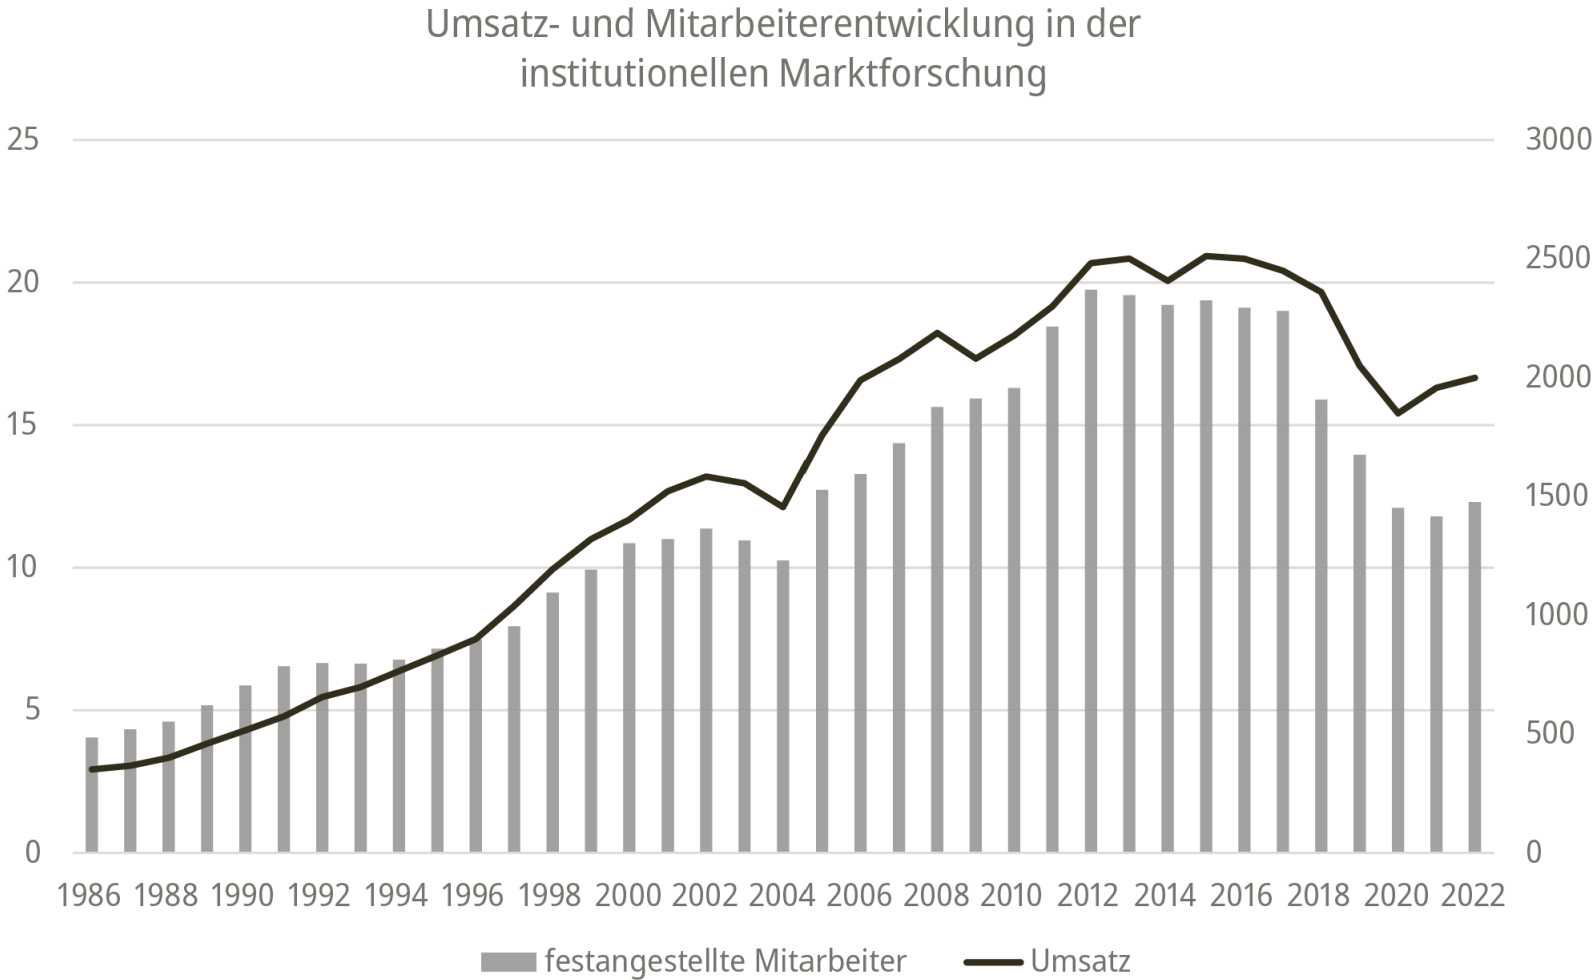

**Abb. 1:** Umsatz- und Mitarbeiterentwicklung in der institutionellen Marktforschung in Deutschland (Skalierung links: Mitarbeiter in Tsd. EURO/Skalierung rechts: Umsatz in Mio.) (Quelle: ADM 2024a).

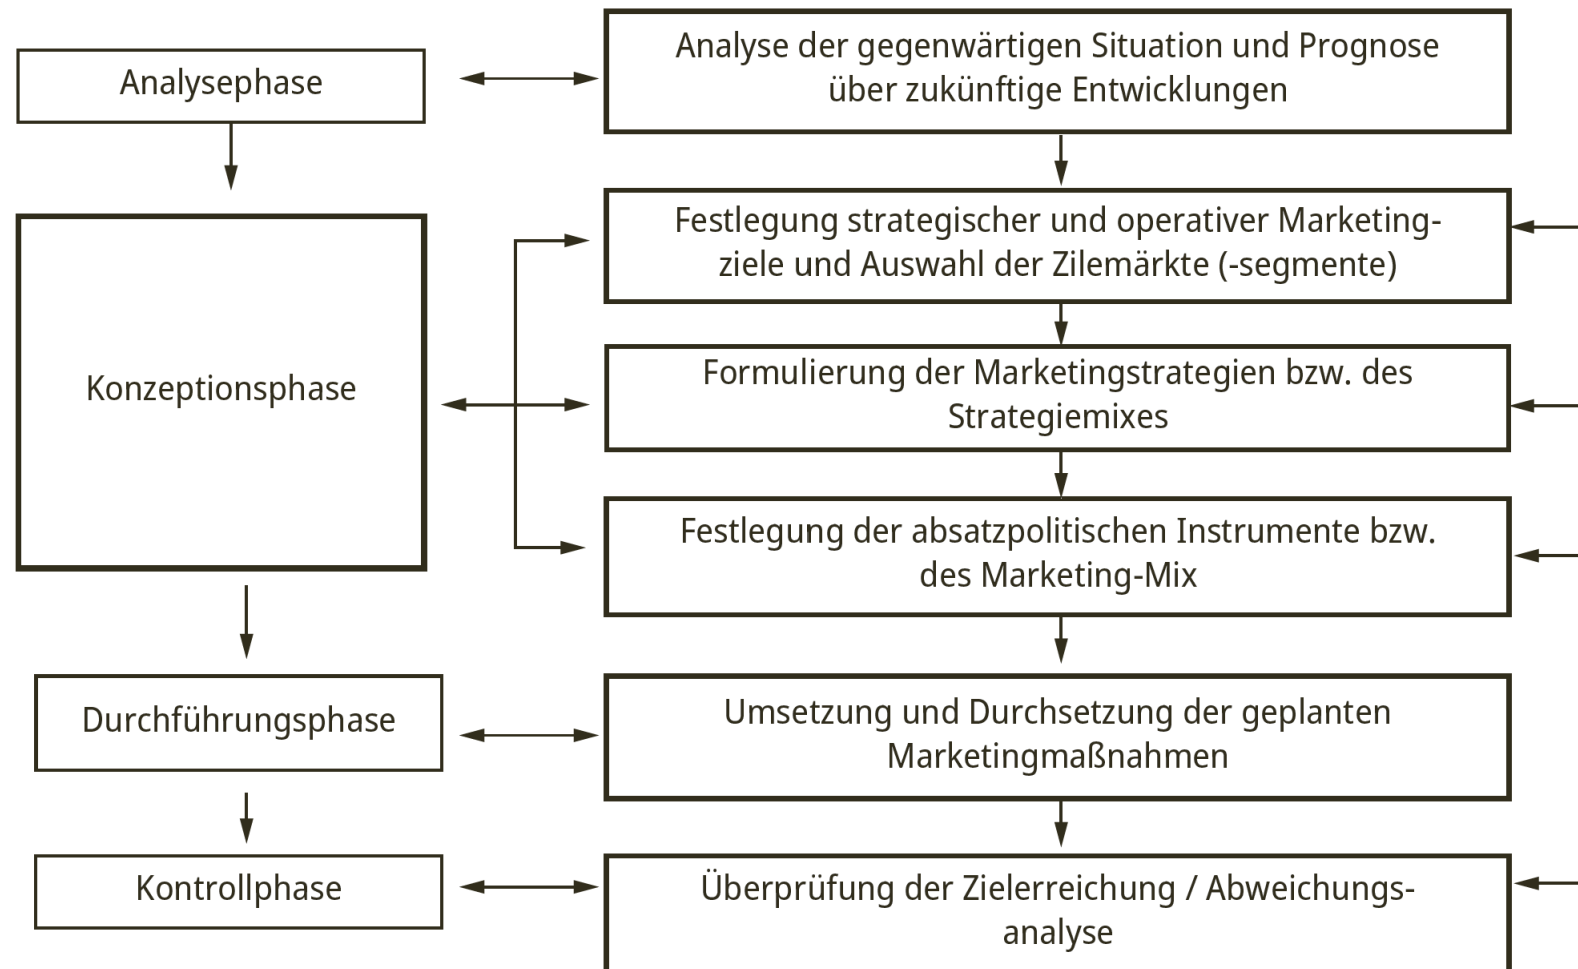

**Abb. 2:** Marketingmanagementprozess (Quelle: Koch 1999, S. 30).

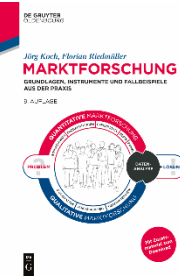

Buch S. 6

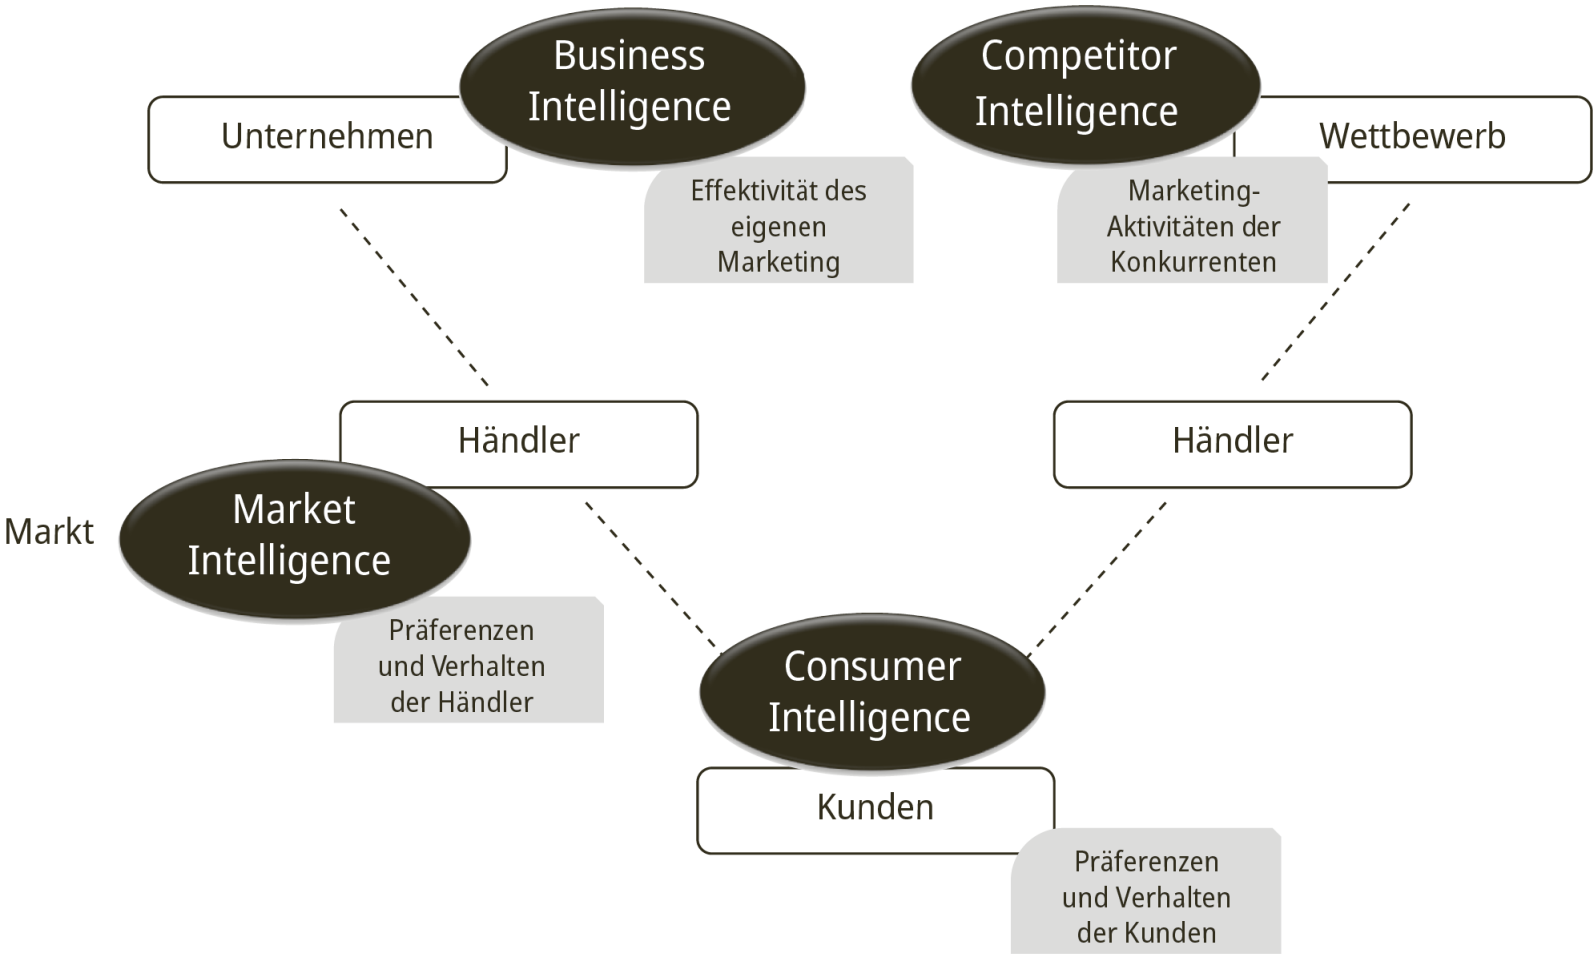

**Abb. 3:** Ansätze von systematischen Markt- und Wettbewerbsanalysen (Quelle: Eigene Abbildung in Anlehnung an Ottawa/Rietz 2015, S. 13).



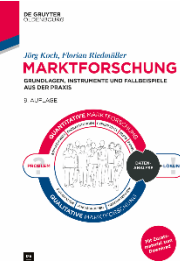

Buch S. 9

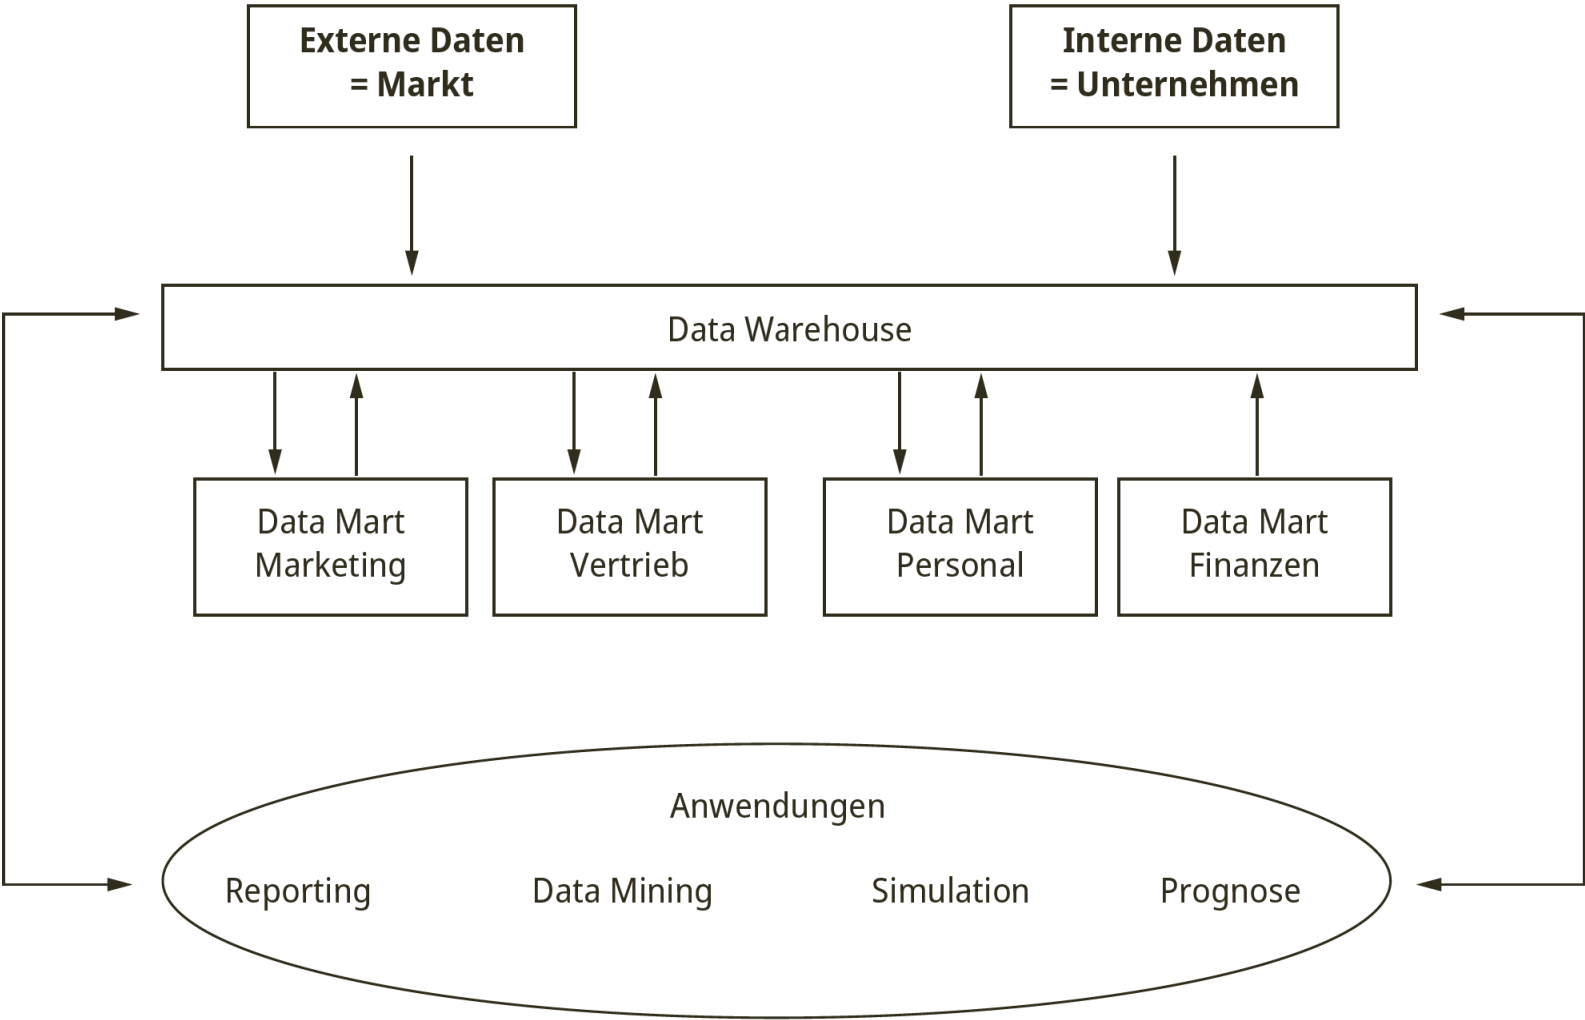

**Abb. 4:** Struktur eines Data-Warehouses (Quelle: Eigene Abbildung).

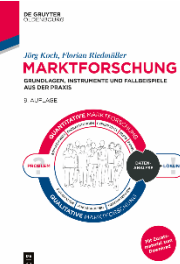

Buch S. 10

**Tab. 1:** Die 15 größten Marktforschungsinstitute in Deutschland im Fünfjahresvergleich nach Umsatz zwischen 2018 und 2023 (in Millionen Euro – Angaben zum Teil geschätzt) (Quelle: Von Kessel 2019, S. 20; Geißler/Henk 2024).

|    |                                                             | Umsatz<br>2018 | Umsatz<br>2023 | Entwicklung |
|----|-------------------------------------------------------------|----------------|----------------|-------------|
| 1  | GfK Gruppe Nürnberg (mittlerweile Teil von NIQ bzw. YouGov) | 1.390          | 950            | – 32 %      |
| 2  | Kantar TNS Deutschland                                      | 190            | 180            | – 5 %       |
| 3  | Ipsos Gruppe Deutschland                                    | 77             | 84             | + 9 %       |
| 4  | Infas Institut für angewandte Sozialwissenschaft GmbH       | 25             | 46             | + 84 %      |
| 5  | GIM Gruppe Heidelberg                                       | 29             | 42             | + 45 %      |
| 6  | Psyma Group Rückersdorf                                     | 35             | 36             | + 3 %       |
| 7  | Mindline Hamburg                                            | 19             | 22             | + 16 %      |
| 8  | Verian (vorher Kantar Public)                               | -              | 22             | +– 0 %      |
| 9  | SKOPOS Group                                                | 10             | 20             | + 100 %     |
| 10 | Foerster & Thelen Group Bochum                              | 18             | 18             | +– 0 %      |
| 11 | Produkt + Markt Wallenhorst                                 | 19             | 18             | – 5 %       |
| 12 | YouGov Köln                                                 | 10             | 18             | + 80 %      |
| 13 | INTEGRAL – SINUS – OPINION Gruppe                           | k.A.           | 16             | +– 0 %      |
| 14 | Statista Q Hamburg                                          | 5              | 15             | + 200 %     |
| 15 | INNOFACT AG                                                 | k.A.           | 15             | – 16,2 %    |



**Tab. 2:** Gegenüberstellung der zentralen Vorteile von Eigen- und Fremdmarktforschung (Quelle: Eigene Abbildung).

| Vorteile der Eigenmarktforschung (make)                                                                                                                                                                                                                                                                                | Vorteile der Fremdmarktforschung (buy)                                                                                                                                                                                                                                                                   |
|------------------------------------------------------------------------------------------------------------------------------------------------------------------------------------------------------------------------------------------------------------------------------------------------------------------------|----------------------------------------------------------------------------------------------------------------------------------------------------------------------------------------------------------------------------------------------------------------------------------------------------------|
| <ul style="list-style-type: none"><li>– Hohes Branchen-Know-how</li><li>– Schnelle Einarbeitung in die Thematik</li><li>– Unkomplizierte Einbindung von anderen Abteilungen des Unternehmens</li><li>– Berücksichtigung von unternehmenspolitisch relevanten Besonderheiten</li><li>– Geringe Planungskosten</li></ul> | <ul style="list-style-type: none"><li>– Hohes Methoden-Know-how</li><li>– Schnelle Durchführung</li><li>– Unkomplizierte Einbindung von Methodenexperten der Marktforschung</li><li>– Hohe Neutralität bei der Durchführung und Kommunikation der Studie</li><li>– Geringe Durchführungskosten</li></ul> |

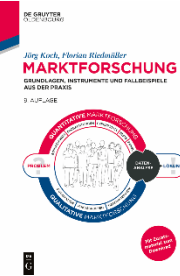

Buch S. 12

**Tab. 3:** Ablauf einer Marktforschungsstudie und Unterstützungspotenzial durch KI (Quelle: Eigene Abbildung).

| Prozessablauf entsprechend der 5Ds                                                                                                                                                                                                                                                                                                                                        | Mögliche Unterstützung durch KI                                                                                                                                                                                                                                                                                                  |
|---------------------------------------------------------------------------------------------------------------------------------------------------------------------------------------------------------------------------------------------------------------------------------------------------------------------------------------------------------------------------|----------------------------------------------------------------------------------------------------------------------------------------------------------------------------------------------------------------------------------------------------------------------------------------------------------------------------------|
| <b>Definitionsphase</b> <ul style="list-style-type: none"><li>– Problemdefinition</li><li>– Ableitung der Erhebungsziele</li><li>– Bestimmung des Untersuchungsmodells</li></ul>                                                                                                                                                                                          | Geringe Unterstützungsleistung <ul style="list-style-type: none"><li>– Abgleich der Erhebungsziele mit Best Practice Studien</li><li>– Ableitung von Prompt-Checklisten für die weiteren Phasen</li></ul>                                                                                                                        |
| <b>Designphase</b> <ul style="list-style-type: none"><li>– Info-Quellen (Primär- vs. Sekundär-MaFo / Eigen- vs. Fremd-MaFo)</li><li>– Erhebungseinheiten (Quantitativ vs. Qualitativ / Methoden / Häufigkeit)</li><li>– Grundgesamtheit und Stichprobe</li><li>– Itemformulierung und Skalierung</li><li>– Erstellung Arbeits-, Zeit-, und Kostenplan / Pretest</li></ul> | Mittlere Unterstützungsleistung <ul style="list-style-type: none"><li>– Entwicklung von Vorschlägen für ein passendes Erhebungsdesign</li><li>– Entwicklung von Fragenbatterien entsprechend der Fragestellung</li><li>– Simulation von Pretest-Befragungen durch Zielgruppen Personas</li></ul>                                 |
| <b>Feldphase (Datengewinnung)</b> <ul style="list-style-type: none"><li>– Durchführung und Organisation</li><li>– Kontrolle und Dokumentation der Datenerhebung</li><li>– Prüfung der Erhebungsergebnisse</li></ul>                                                                                                                                                       | Mittlere Unterstützungsleistung <ul style="list-style-type: none"><li>– Einsatz von KI-gestützten Chatbots zur Durchführung von einfachen Interviews</li><li>– Nutzung von Konsistenz-Algorithmen zur Ableitung fehlender Angaben aus gegebenen Antworten</li><li>– Identifikation von unechten Befragten (Bot-Farmen)</li></ul> |
| <b>Analysephase (Datenerhebung)</b> <ul style="list-style-type: none"><li>– Vorbereitung der Datenanalyse (Integration verschiedener Datensätzen, Datenbereinigung)</li><li>– Auswertung und Interpretation</li></ul>                                                                                                                                                     | Hohe Unterstützungsleistung <ul style="list-style-type: none"><li>– Automatische Analyse von aufgezeichneten Gesprächsprotokollen</li><li>– Erstellung von automatisierten Berichten</li></ul>                                                                                                                                   |
| <b>Kommunikationsphase (Dokumentation)</b> <ul style="list-style-type: none"><li>– Abfassung des Forschungsberichts</li><li>– Präsentation der Forschungsergebnisse</li></ul>                                                                                                                                                                                             | Hohe Unterstützungsleistung <ul style="list-style-type: none"><li>– Aktivierende Datenvisualisierung</li><li>– Automatische Textgenerierung</li></ul>                                                                                                                                                                            |

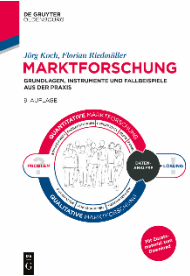

Buch S. 17

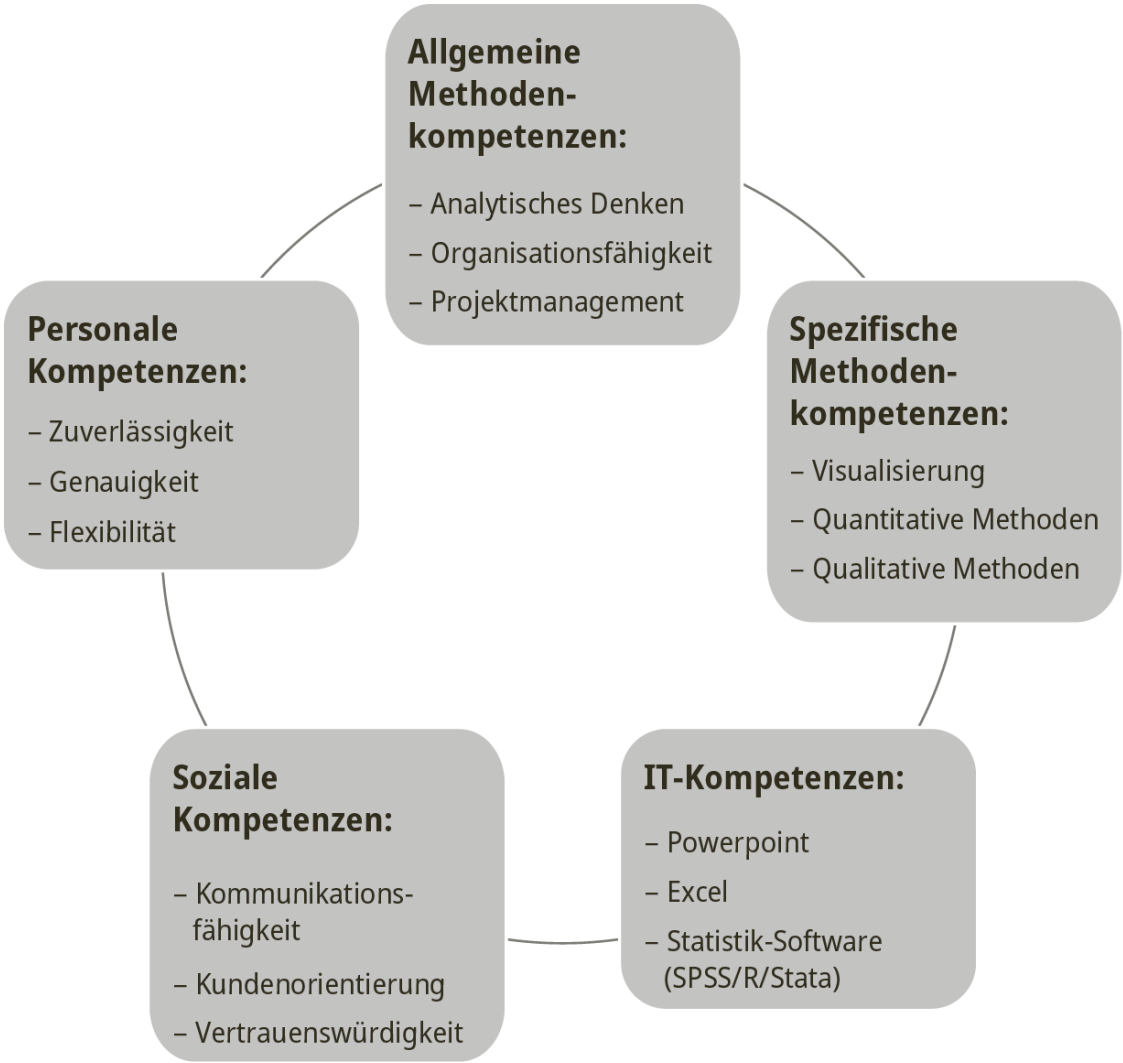

**Abb. 5:** Wichtige Kompetenzen für die deutschsprachige Marktforschung (Quelle: Ottawa/Winkler 2018, S. 91 ff).

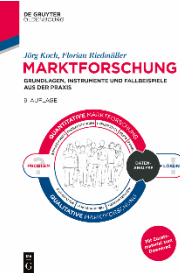

Buch S. 20

**Tab. 4:** Exemplarische Ableitung von Untersuchungsfragen aus Entscheidungsproblemen in unterschiedlichen Abteilungen (Quelle: Eigene Abbildung).

| Abteilung         | Entscheidungsproblem                                                            | Untersuchungsfrage                                                                                             |
|-------------------|---------------------------------------------------------------------------------|----------------------------------------------------------------------------------------------------------------|
| Produktmanagement | Entwicklung einer neuen Verpackung aus nachhaltigen Materialien für ein Produkt | Wie werden unterschiedliche Prototypen der neuen Verpackung von der Zielgruppe wahrgenommen und beurteilt?     |
| Kommunikation     | Planung einer Social Media-Kampagne zur Neukundengewinnung                      | Welche Zielgruppen des Unternehmens sind auf welchen Social Media Plattformen wie aktiv?                       |
| Vertrieb          | Neustrukturierung eines Rabattsystems für A-, B- und C-Kunden                   | Welches aktuelle Umsatzvolumen und zukünftige Umsatzpotenzial haben die verschiedenen Kunden des Unternehmens? |

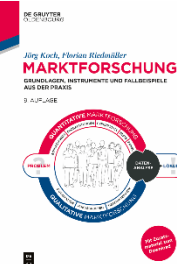

Buch S. 21/22

## Leitfaden Ausschreibung

|                             |                                                                                                                                                                                                                                                                                                                                                                                                                                                                                                                                                                                                          |
|-----------------------------|----------------------------------------------------------------------------------------------------------------------------------------------------------------------------------------------------------------------------------------------------------------------------------------------------------------------------------------------------------------------------------------------------------------------------------------------------------------------------------------------------------------------------------------------------------------------------------------------------------|
| Name der Studie             | Geben Sie Ihrem Projekt eine Identifikation (Namen oder Projekt-Nummer).                                                                                                                                                                                                                                                                                                                                                                                                                                                                                                                                 |
| Studienhintergrund          | Geben Sie hier bitte eine kurze Beschreibung u.a. des Marktes, der Stellung Ihres Produktes und/oder Unternehmens – Informationen, die helfen könnten, Ihre Problemstellung gut zu verstehen.                                                                                                                                                                                                                                                                                                                                                                                                            |
| Geschäfts-entscheidung      | Was soll anhand der Ergebnisse der angefragten Untersuchung für eine Entscheidung getroffen werden?                                                                                                                                                                                                                                                                                                                                                                                                                                                                                                      |
| MR Objectives               | Geben Sie an (soweit möglich), welche Ziele das Projekt verfolgen soll. Denkbar wäre z.B. <ul style="list-style-type: none"><li>– Relevanz und/oder</li><li>– Wahrnehmung messen</li><li>– Entscheidung über Produkteinführung</li><li>– etc.</li></ul>                                                                                                                                                                                                                                                                                                                                                  |
| Methode                     | Sofern Sie bereits eine Vorstellung haben, welcher methodische Ansatz Anwendung finden könnte (oder sollte – da u.U. Wiederholungsstudie), geben Sie dies hier an, z.B. <ul style="list-style-type: none"><li>– qualitativer oder quantitativer Ansatz</li><li>– Einzelinterviews oder Gruppendiskussion</li><li>– CATI, CAWI, schriftlich postalisch, online usw.</li><li>– evtl. erwarten Sie auch eine qualitative Vorstudie (welcher Art?).</li><li>– etc.</li></ul> <p><i>Zu empfehlen ist allerdings immer, das Institut aufzufordern, auch eigene Vorschläge mit Begründung einzubringen.</i></p> |
| Zielgruppe(n)               | Beschreiben Sie hier so genau wie möglich die Zielgruppe, die befragt werden soll:<br><br>z.B. Apfelweintrinker und Biertrinker, Studenten, Maurergesellen, bevölkerungsrepräsentativ ab 18 Jahre, Schwangere, IT-Einkäufer etc.                                                                                                                                                                                                                                                                                                                                                                         |
| Stichproben-zusammensetzung | Sofern Sie bereits eine Vorstellung haben (da u.U. Wiederholungsstudie), spezifizieren Sie hier, z.B. <ul style="list-style-type: none"><li>– X% reine Apfelweintrinker</li><li>– X% reine Biertrinker</li><li>– X% Befragte, die beides trinken</li></ul> Evtl. wünschen Sie aber auch eine bevölkerungsrepräsentative Verteilung?<br><br><i>Zu empfehlen ist auch hier, das Institut aufzufordern, auch eigene Vorschläge mit Begründung einzubringen.</i>                                                                                                                                             |

**Abb. 6:** Leitfaden für das zielgenaue Briefing von Marktforschungsstudien (Seite 1 und 2 von 4) (Quelle: BVM 2024).

|                                         |                                                                                                                                                                                                                                                                                                                                                                                                                                                                                                                                                                                                                                                                                                                                                                                                                                  |
|-----------------------------------------|----------------------------------------------------------------------------------------------------------------------------------------------------------------------------------------------------------------------------------------------------------------------------------------------------------------------------------------------------------------------------------------------------------------------------------------------------------------------------------------------------------------------------------------------------------------------------------------------------------------------------------------------------------------------------------------------------------------------------------------------------------------------------------------------------------------------------------|
| Rekrutierungs-kriterien bzw. Quotierung | Sofern Sie bereits eine Vorstellung haben (da u.U. Wiederholungsstudie), spezifizieren Sie hier, z.B. <ul style="list-style-type: none"><li>– nicht jünger als 18 Jahre und nicht älter als 99 Jahre</li><li>– alle sind gebürtige Franken</li><li>– seit mindestens drei Monaten nicht an einer Befragung zum Thema Alkohol teilgenommen</li><li>– der Befragte selbst und niemand in seiner Familie arbeitet in der Marktforschung bzw. in der Getränkebranche</li></ul>                                                                                                                                                                                                                                                                                                                                                       |
| Länge der Interviews                    | Sofern Sie bereits eine Vorstellung haben (da u.U. Wiederholungsstudie), geben Sie hier Ihre Einschätzung, am besten in Minuten.<br><br>Da es i.d.R. für ein außenstehendes Institut schwierig sein wird, abzuschätzen, wie umfangreich die Befragung tatsächlich sein wird, könnten Angaben zur Anzahl der Fragen insgesamt und darüber, wie viele davon „offene“ bzw. „geschlossene“ Fragen sind (sofern bereits bekannt), ein wichtiger Hinweis sein.<br><br><i>Zu empfehlen ist auch hier, das Institut aufzufordern, auch eigene Vorschläge mit Begründung einzubringen.</i>                                                                                                                                                                                                                                                |
| Region                                  | Sofern Sie bereits eine Vorstellung haben (da u.U. Wiederholungsstudie), machen Sie hier Ihre Angaben, z.B. Nordrhein-Westfalen, ganz Deutschland, Benelux-Staaten, ...                                                                                                                                                                                                                                                                                                                                                                                                                                                                                                                                                                                                                                                          |
| Adressdaten                             | Möglicherweise möchten Sie die Befragung sehr fokussiert z.B. in Ihrem Kundenstamm durchführen. In diesem Fall würden Sie hier angeben, dass von Ihrer Seite Kontaktinformationen bereitgestellt werden. Ansonsten wird das Institut von sogenannter freier Rekrutierung ausgehen (was Einfluss auf die Kostengestaltung und den Zeitplan haben kann).<br><br><i>Bitte denken Sie daran, dass nur solche Adressdaten weitergegeben werden sollten, zu denen eine Einwilligung zur Weitergabe existiert. Gegebenenfalls diskutieren Sie das Stichwort „Auftragsdatenverarbeitung“ mit Ihrem Institut.</i>                                                                                                                                                                                                                         |
| Leistungen                              | Geben Sie bitte so detailliert wie möglich an, welche Leistungen in dem Angebot berücksichtigt sein sollen und fordern Sie eine entsprechend detaillierte Aufschlüsselung an, anhand derer Sie dann auch die Angebote gut vergleichen können, z.B. <ul style="list-style-type: none"><li>– Projektorganisation</li><li>– Vorbereitung der Interviews</li><li>– Rekrutierung und Incentivierung der Teilnehmer</li><li>– Screener- und Fragebogen-/Leitfadenentwicklung (dies idealerweise in Zusammenarbeit mit Ihnen)</li><li>– ggf. Buchung eines Marktforschungsstudios zur Interviewbeobachtung oder anderer notwendigen Örtlichkeiten oder auch anderer Dienstleister (z.B. Focusvision)</li><li>– Durchführung der Interviews</li><li>– Pretest (ggf. vor Ort)</li><li>– regelmäßige (z.B. tägliche) Debriefings</li></ul> |

**Abb. 6** (fortgesetzt)



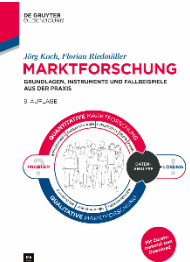

Buch S. 23

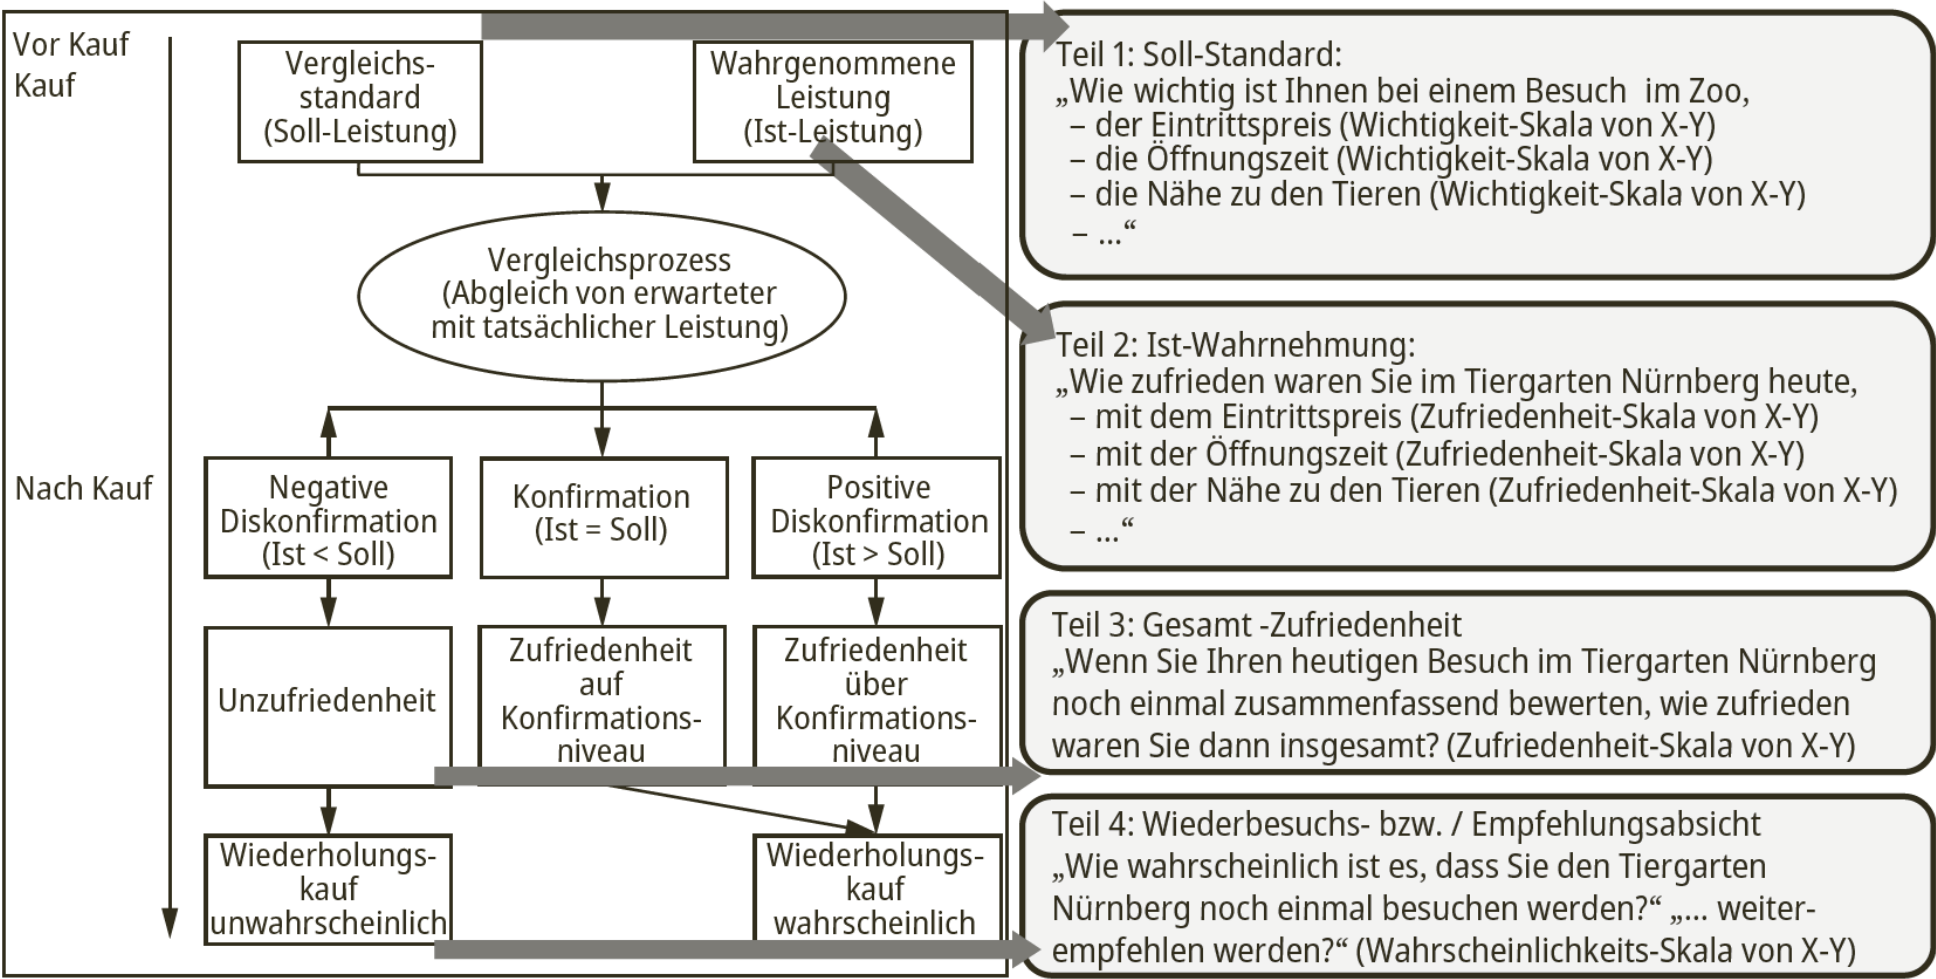

**Abb. 7:** Beispiel für die deduktive Ableitung eines Befragungsaufbaus aus dem C/D-Paradigma (Quelle: Eigene Abbildung in Anlehnung an Giering 2000, S. 8).





Buch S. 26

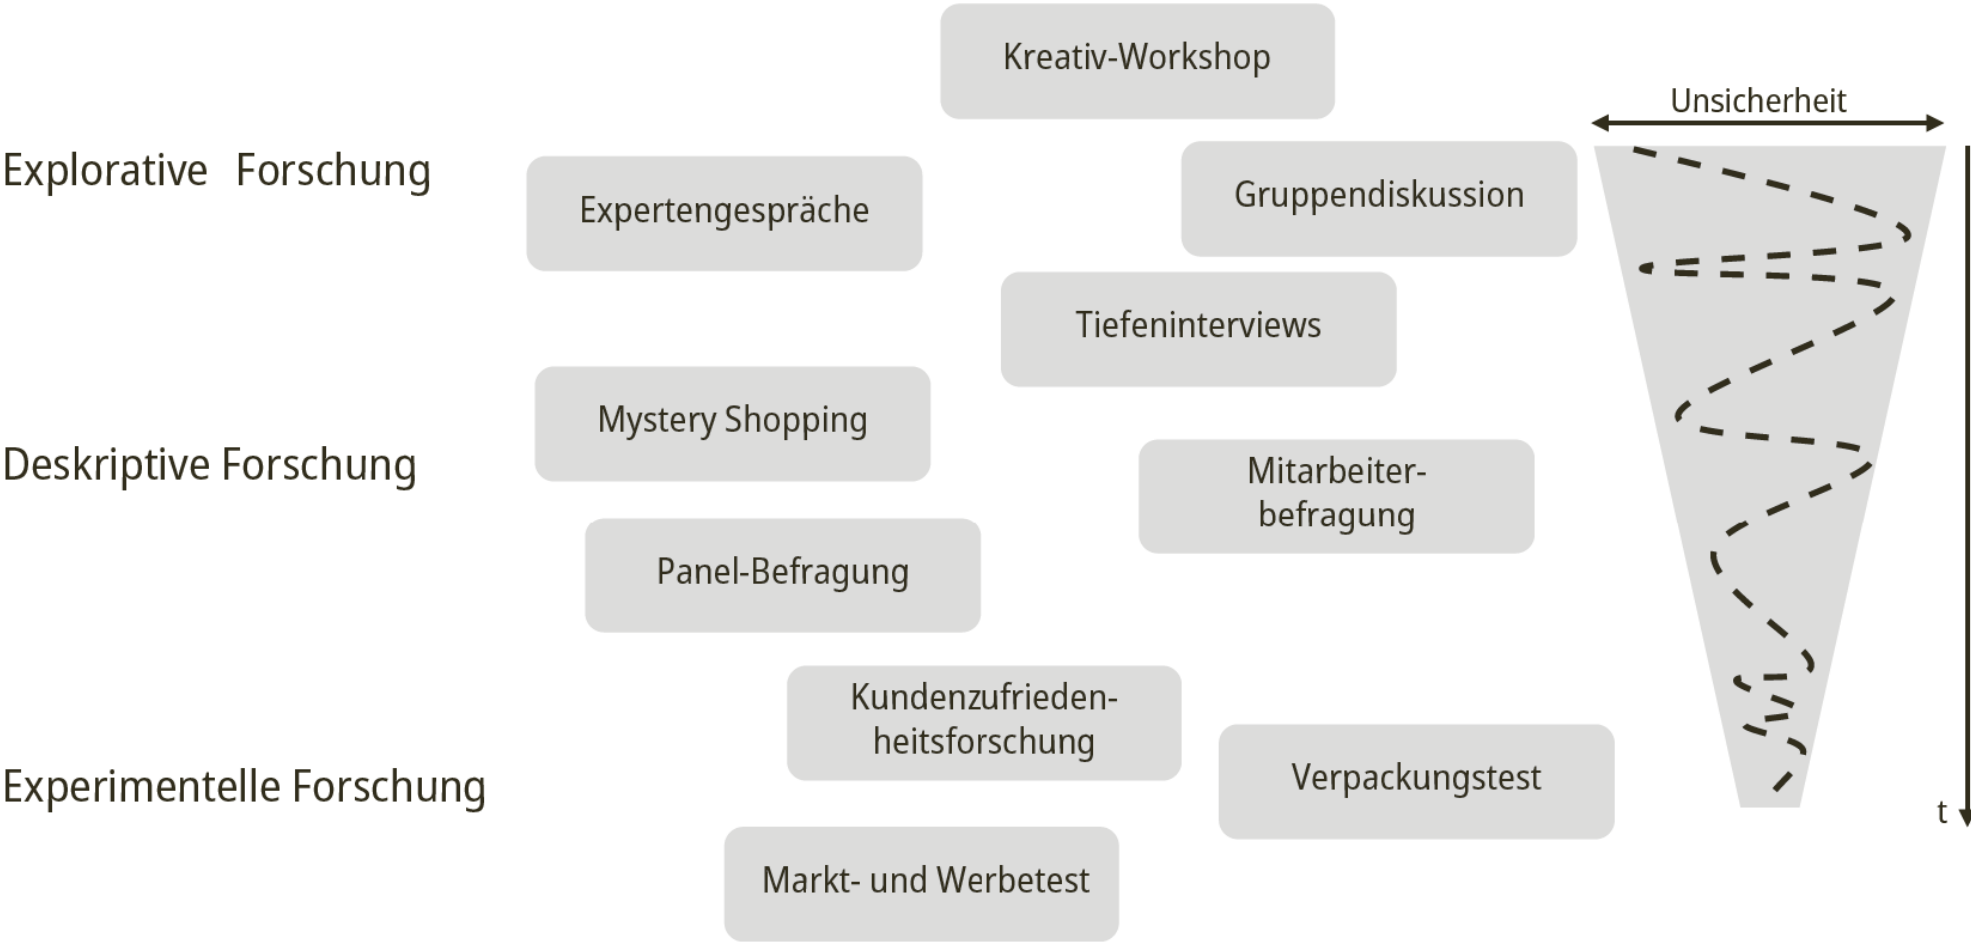

**Abb. 8:** Exemplarischer Methodikbaukasten der Primärforschung (Quelle: Eigene Abbildung).

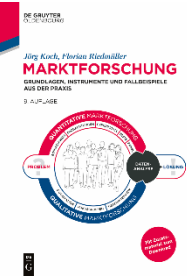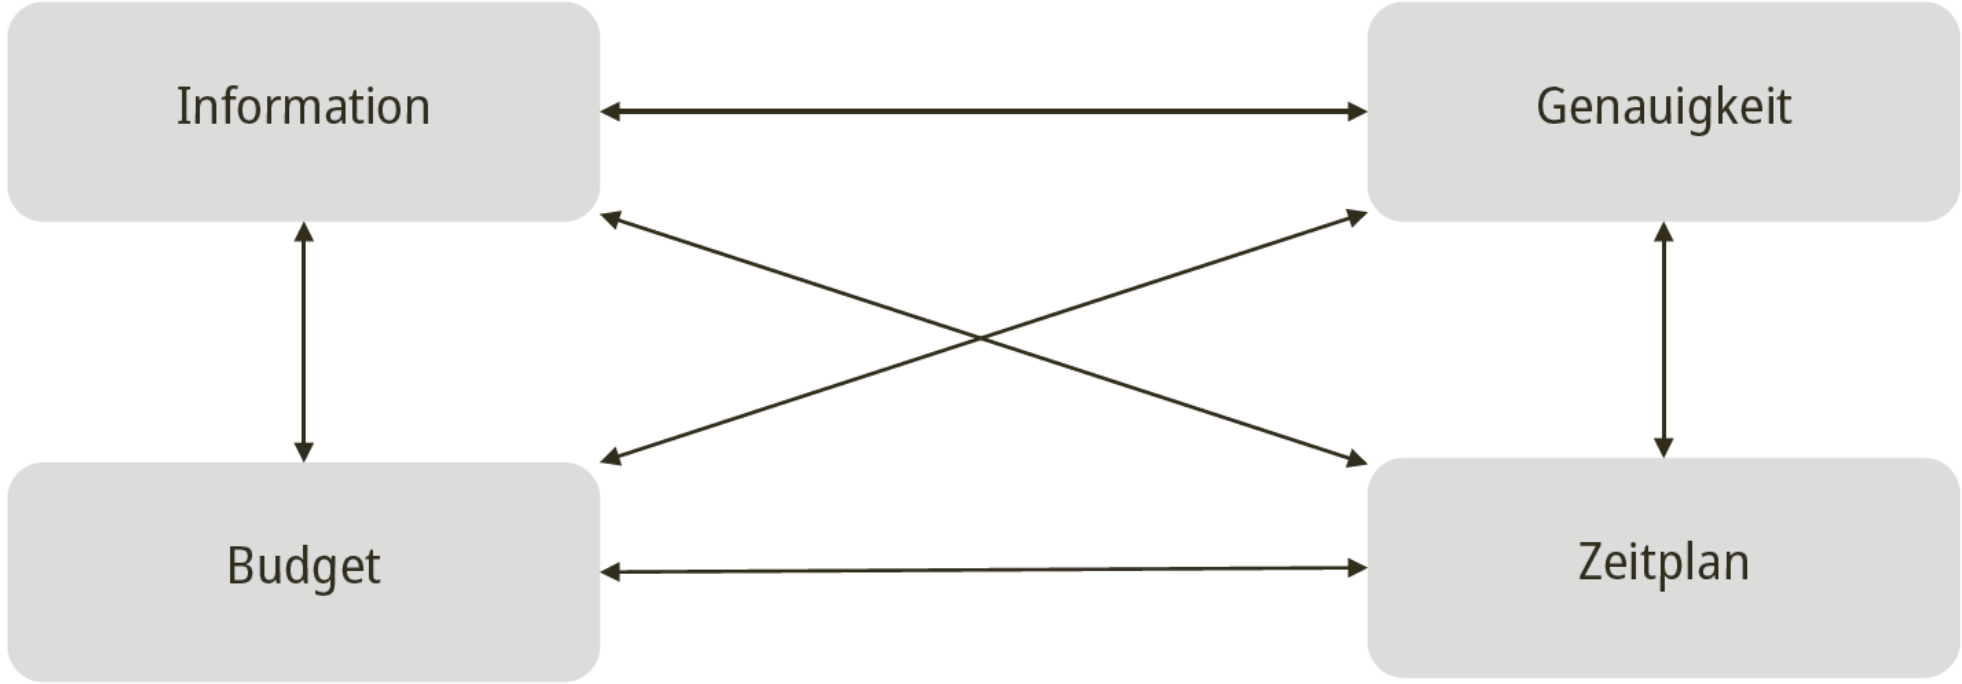

**Abb. 9:** Abhängigkeit des Marktforschungsbudgets vom Studiensetup (Quelle: Ottawa/Rietz 2015, S. 114).



Buch S. 29

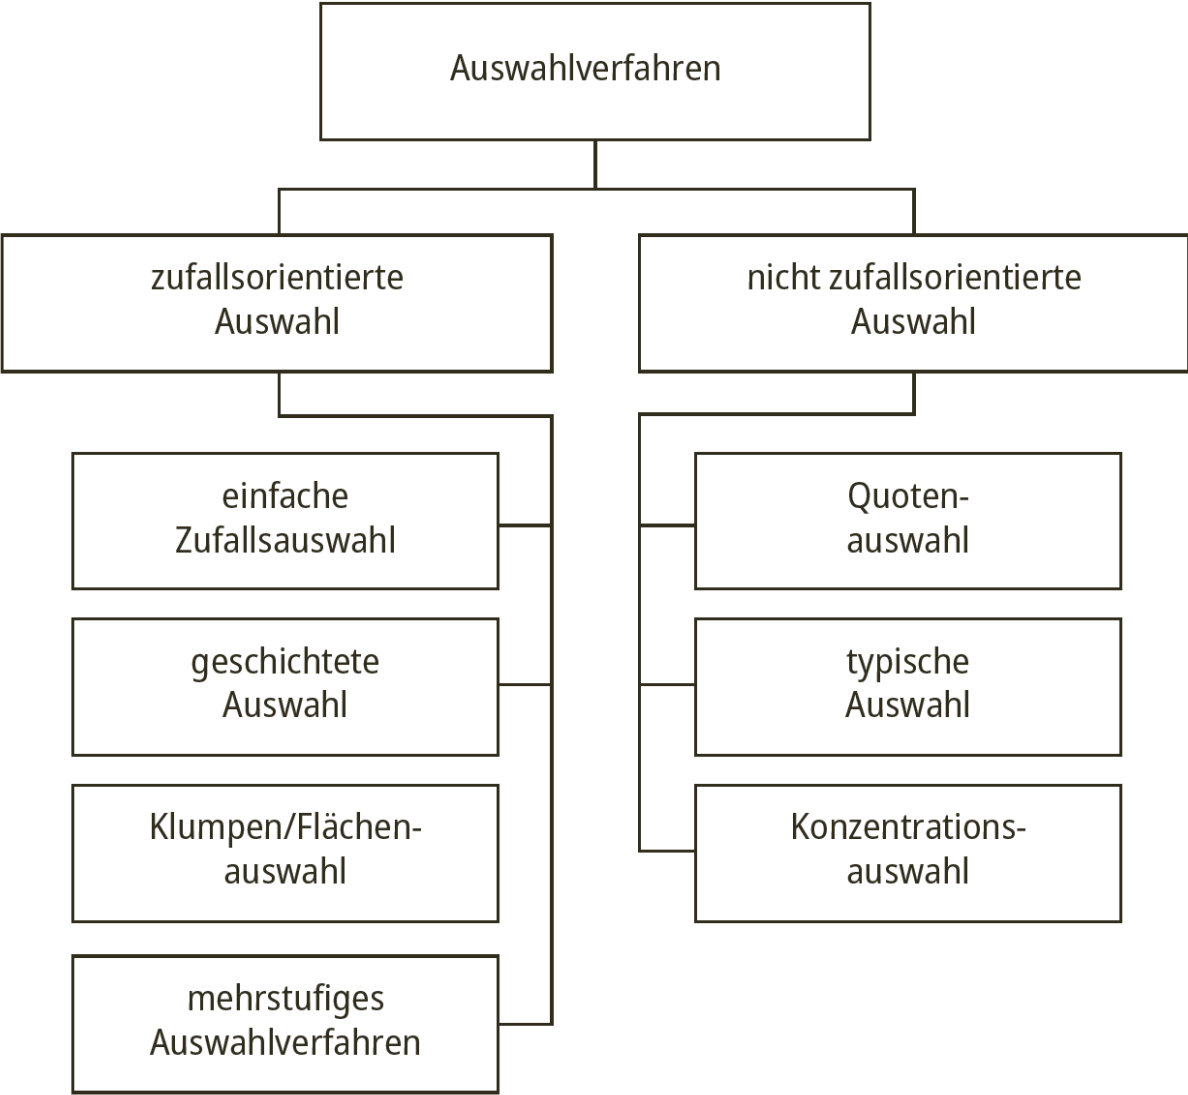

**Abb. 10:** Grundformen von Auswahlverfahren (Quelle: Eigene Abbildung).

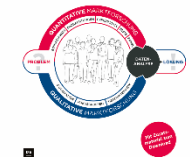

Buch S. 32

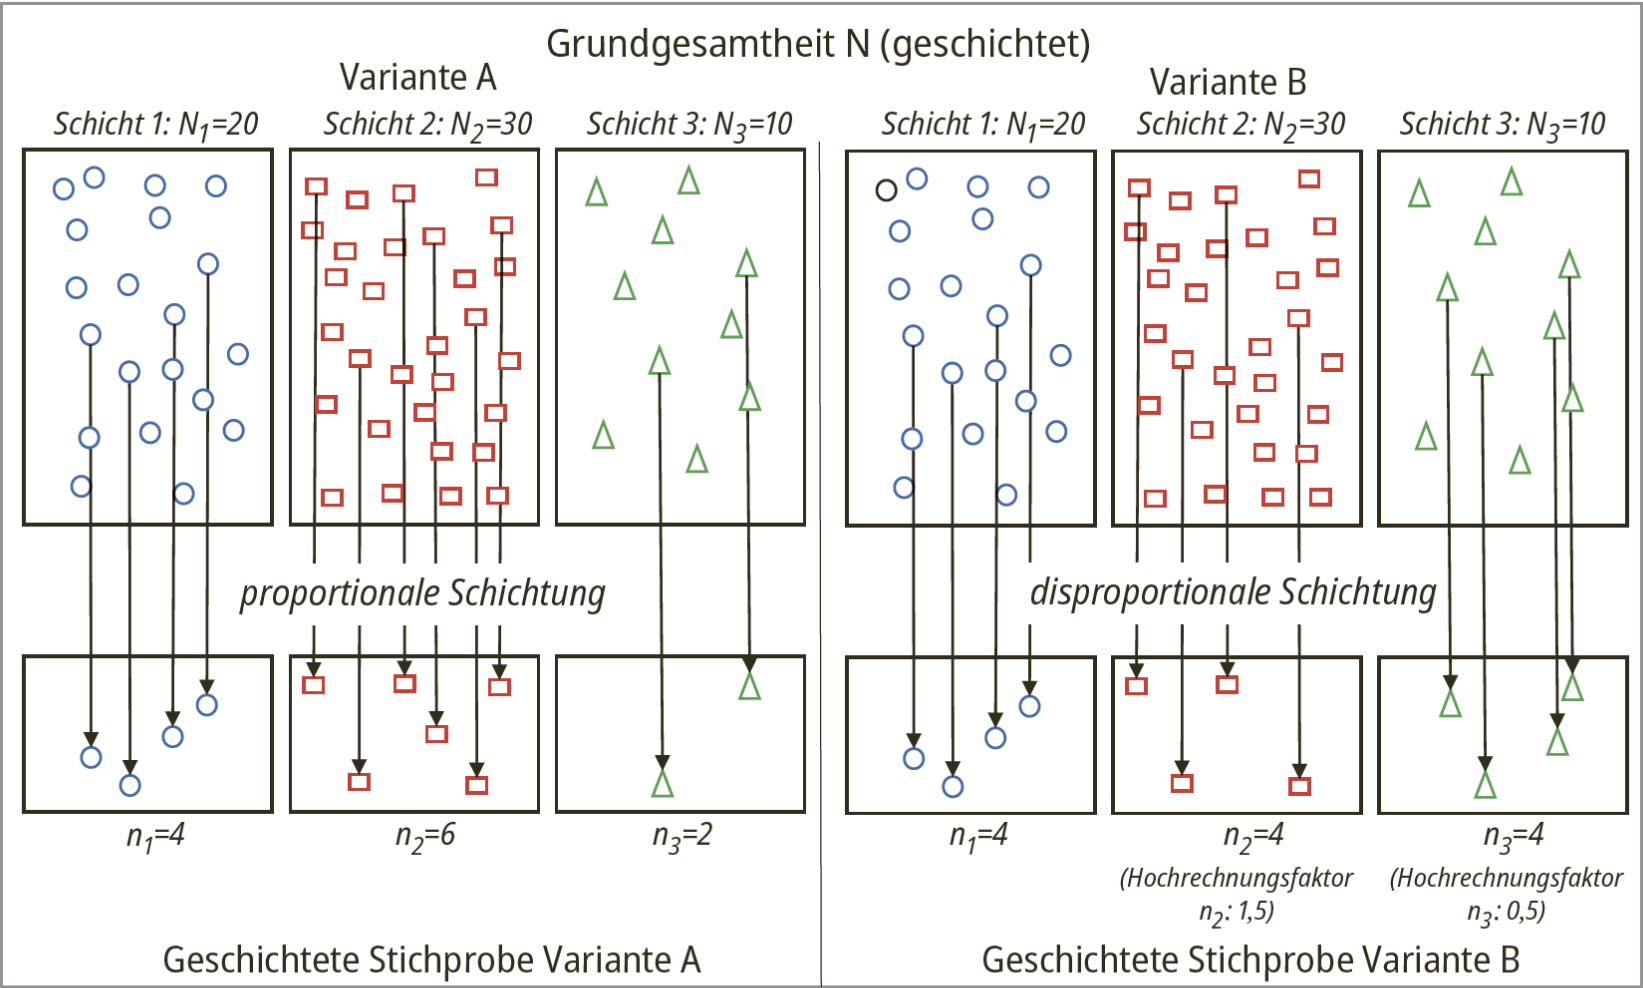

**Abb. 11:** Geschichtete Zufallsauswahl mit proportionaler bzw. disproportionaler Schichtung  
(Quelle: Eigene Abbildung).



Buch S. 33

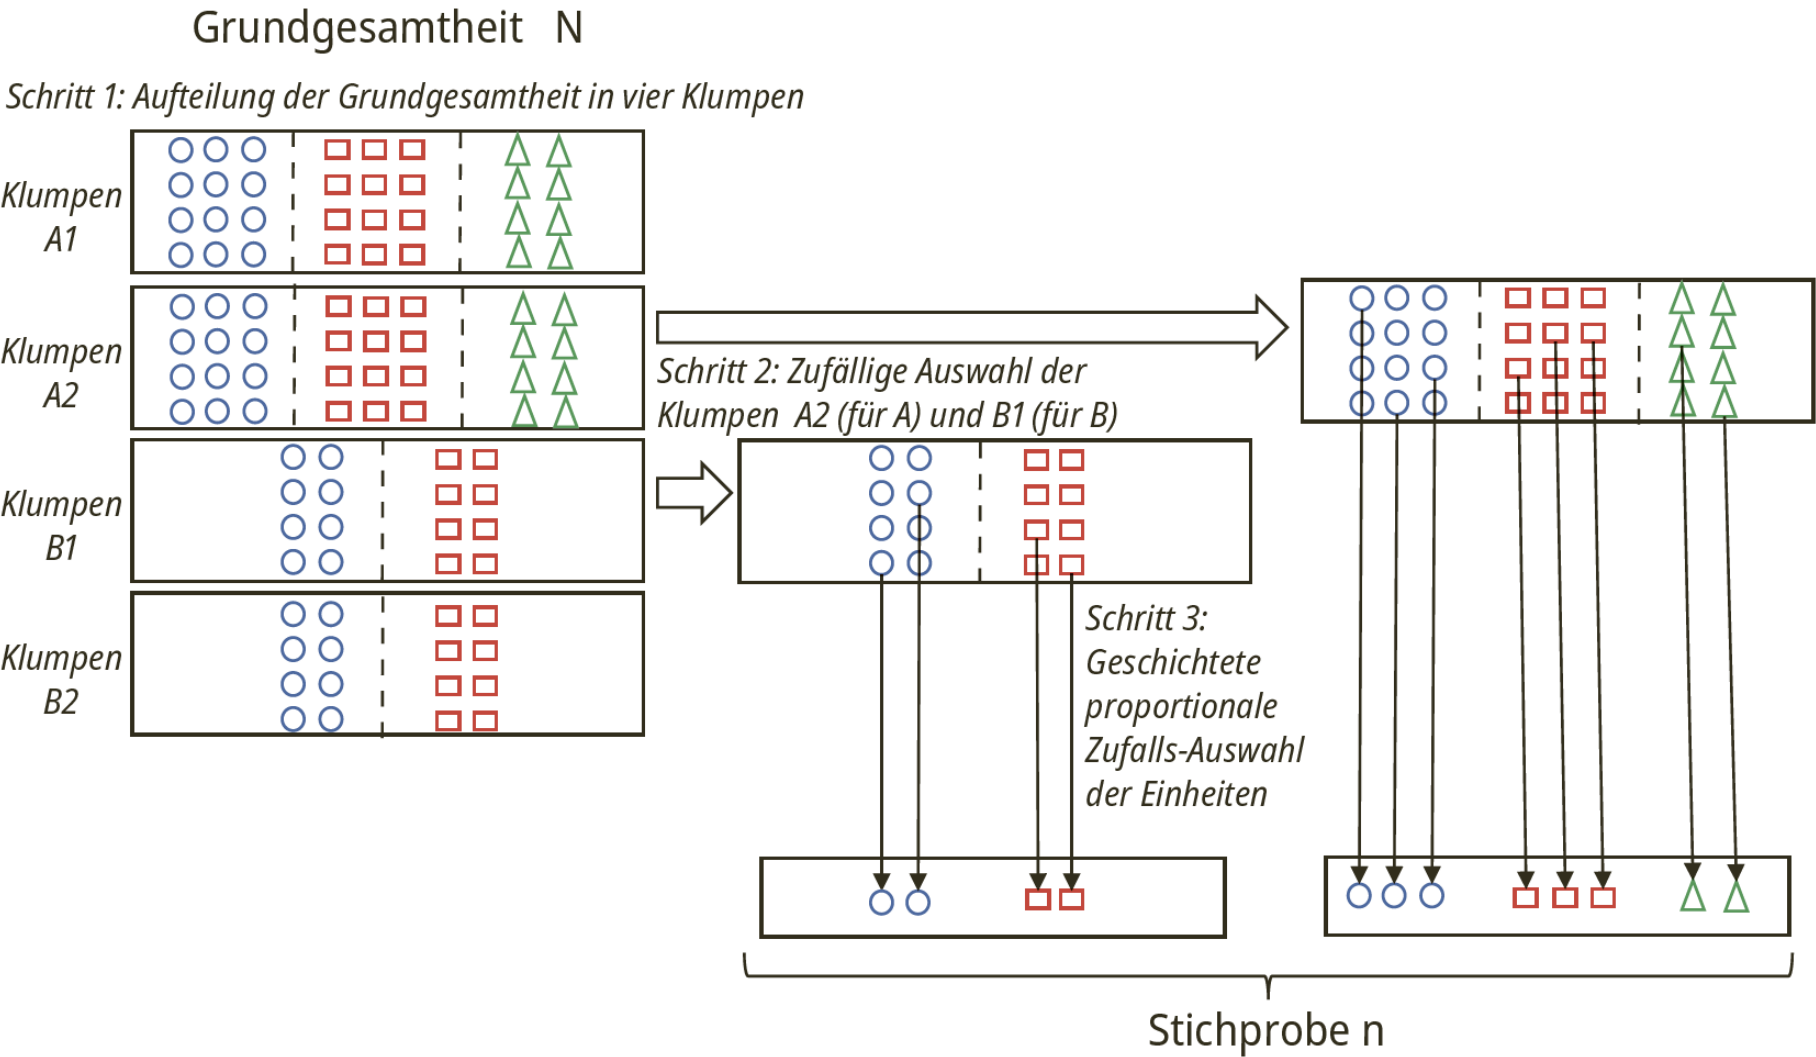

**Abb. 12:** Kombination aus zufälliger Klumpen- und Schichtenauswahl (Quelle: Eigene Abbildung).



**Tab. 5:** Vor- und Nachteile der verschiedenen Zufallsverfahren (Quelle: Eigene Abbildung).

|                                                         | Einfache<br>Zufallsauswahl              | Geschichtete<br>Zufallsauswahl                   | Klumpenauswahl                               | Mehrstufige<br>Verfahren                          |
|---------------------------------------------------------|-----------------------------------------|--------------------------------------------------|----------------------------------------------|---------------------------------------------------|
| Einfluss des Interviewers auf die Auswahl der Befragten | niedrig                                 | niedrig                                          | niedrig                                      | niedrig                                           |
| Kenntnis der Merkmalsstruktur in <i>N</i> erforderlich  | Nein                                    | Ja                                               | Ja                                           | Ja                                                |
| Zeit zur Planung und Durchführung des Verfahrens        | niedrig                                 | hoch                                             | niedrig                                      | sehr hoch                                         |
| Standardabweichung                                      | Normal, entsprechend dem Zufallsprinzip | Niedriger als bei einer einfachen Zufallsauswahl | Höher als bei einer einfachen Zufallsauswahl | Abhängig vom Verhältnis der Schichten und Klumpen |
| Aufschlüsselung der Ergebnisse                          | normal                                  | Fokus auf einzelne Segmente (Schichten)          | Fokus auf einzelne Regionen (Klumpen)        | Abhängig vom Verhältnis der Schichten und Klumpen |



Buch S. 36

**Tab. 6:** Beispiel für eine Quotenanweisung zu einer Gesamtzahl von 17 Interviews (Quelle: Hammann/ Erichson 2000, S. 135).

| Quotenmerkmal | Quotenausprägung | Vorgabe Interviews | „Abstreichliste“     |
|---------------|------------------|--------------------|----------------------|
| Stadtteil     | Altenbochum      | 7                  | 1 2 3 4 5 6 7        |
|               | Weitmar          | 4                  | 1 2 3 4              |
|               | Wiemelshausen    | 6                  | 1 2 3 4 5 6          |
| Geschlecht    | Männlich         | 8                  | 1 2 3 4 5 6 7 8      |
|               | Weiblich         | 9                  | 1 2 3 4 5 6 7 8 9    |
| Alter         | 18–29            | 2                  | 1 2                  |
|               | 30–39            | 4                  | 1 2 3 4              |
|               | 40–49            | 5                  | 1 2 3 4 5            |
|               | 50–59            | 4                  | 1 2 3 4              |
|               | 60 und älter     | 2                  | 1 2                  |
| Beruf         | Arbeiter         | 6                  | 1 2 3 4 5 6          |
|               | Angestellte      | 4                  | 1 2 3 4              |
|               | Beamte           | 4                  | 1 2 3 4              |
|               | Selbständig      | 3                  | 1 2 3                |
| Personenstand | Verheiratet      | 10                 | 1 2 3 4 5 6 7 8 9 10 |
|               | Ledig/Geschieden | 7                  | 1 2 3 4 5 6 7        |



Buch S. 38

**Tab. 7:** Vor- und Nachteile der verschiedenen bewussten Auswahlverfahren (Quelle: Eigene Abbildung).

|                                                         | Quotenverfahren                              | Typische Auswahl                                     | Konzentrationsauswahl                                |
|---------------------------------------------------------|----------------------------------------------|------------------------------------------------------|------------------------------------------------------|
| Einfluss des Interviewers auf die Auswahl der Befragten | mittel                                       | hoch                                                 | niedrig                                              |
| Kenntnis der Merkmalsstruktur in <i>N</i> erforderlich  | Ja                                           | Nein                                                 | Ja                                                   |
| Zeit zur Planung und Durchführung des Verfahrens        | hoch                                         | sehr niedrig                                         | niedrig                                              |
| Standardabweichung                                      | Höher als bei einer einfachen Zufallsauswahl | Niedriger durch Konzentration auf bestimmte Segmente | Niedriger durch Konzentration auf bestimmte Segmente |
| Aufschlüsselung der Ergebnisse                          | Möglicher Fokus auf Quotenparameter          | Durch Vorauswahl eingeschränkt                       | Durch Vorauswahl eingeschränkt                       |



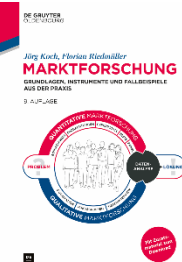

Buch S. 40

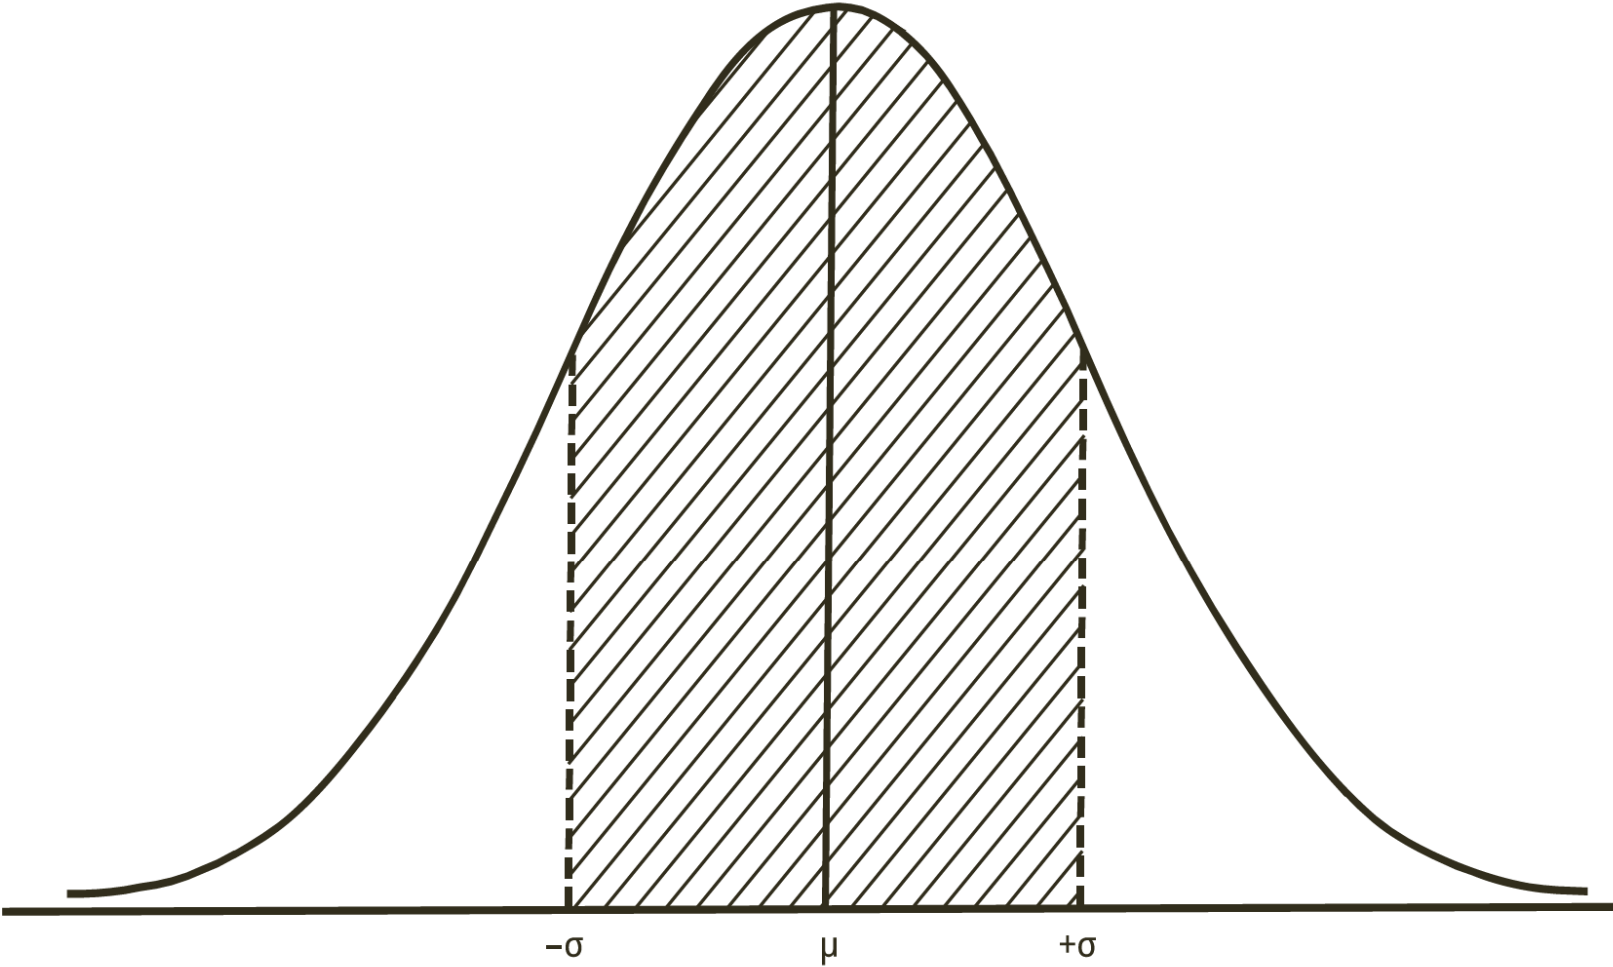

**Abb. 13:** Normalverteilung der arithmetischen Stichprobenmittelwerte (Quelle: Hüttner/Schwarting 2002, S. 55).



Buch S. 41

**Tab. 8:** Ausgewählte Sicherheitsfaktoren mit Vertrauens- und Irrtumswahrscheinlichkeiten (Quelle: Eigene Abbildung).

| Sicherheitsfaktor $t$      | Vertrauenswahrscheinlichkeit | Irrtumswahrscheinlichkeit |
|----------------------------|------------------------------|---------------------------|
| 0,67                       | 50,0 %                       | 50,0 %                    |
| 1,00 ( $\mu \pm 1\sigma$ ) | 68,3 %                       | 31,7 %                    |
| 1,64                       | 90,0 %                       | 10,0 %                    |
| 1,96                       | 95,0 %                       | 5,0 %                     |
| 2,00 ( $\mu \pm 2\sigma$ ) | 95,5 %                       | 4,5 %                     |
| 2,58                       | 99,0 %                       | 1,0 %                     |
| 3,00 ( $\mu \pm 3\sigma$ ) | 99,7 %                       | 0,3 %                     |
| 3,29                       | 99,9 %                       | 0,1 %                     |

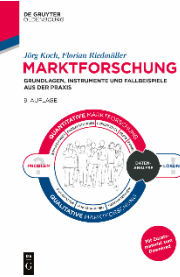

**Tab. 9:** Exemplarische Ableitung von Untersuchungsfragen aus Entscheidungsproblemen in unterschiedlichen Abteilungen (Quelle: Eigene Abbildung).

| Kriterium             | Mögliche Ausprägungen                                                                                                                                        |
|-----------------------|--------------------------------------------------------------------------------------------------------------------------------------------------------------|
| Zielperson(en)        | <ul style="list-style-type: none"><li>– Privatpersonen</li><li>– Experten</li><li>– Haushalte</li><li>– Gruppen</li><li>– Unternehmen</li></ul>              |
| Themenumfang          | <ul style="list-style-type: none"><li>– Einthemenbefragung</li><li>– Mehrthemenbefragung</li><li>– Teilnahme an externer Omnibusbefragung</li></ul>          |
| Standardisierungsgrad | <ul style="list-style-type: none"><li>– Standardisiertes Interview</li><li>– Strukturiertes Interview (Leitfaden)</li><li>– Freies Interview</li></ul>       |
| Befragungsart         | <ul style="list-style-type: none"><li>– Direkte Befragung</li><li>– Indirekte Befragung</li></ul>                                                            |
| Befragungshäufigkeit  | <ul style="list-style-type: none"><li>– Einmalig/ad-hoc-Befragung</li><li>– Mehrmalig/Wellenbefragung</li><li>– Panelbefragung (siehe Abschnitt 2)</li></ul> |
| Befragungsart         | <ul style="list-style-type: none"><li>– Schriftlich</li><li>– Persönlich</li><li>– Telefonisch</li><li>– Online</li><li>– Befragungs-Apps</li></ul>          |

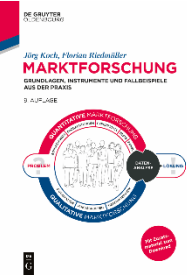

Buch S. 47

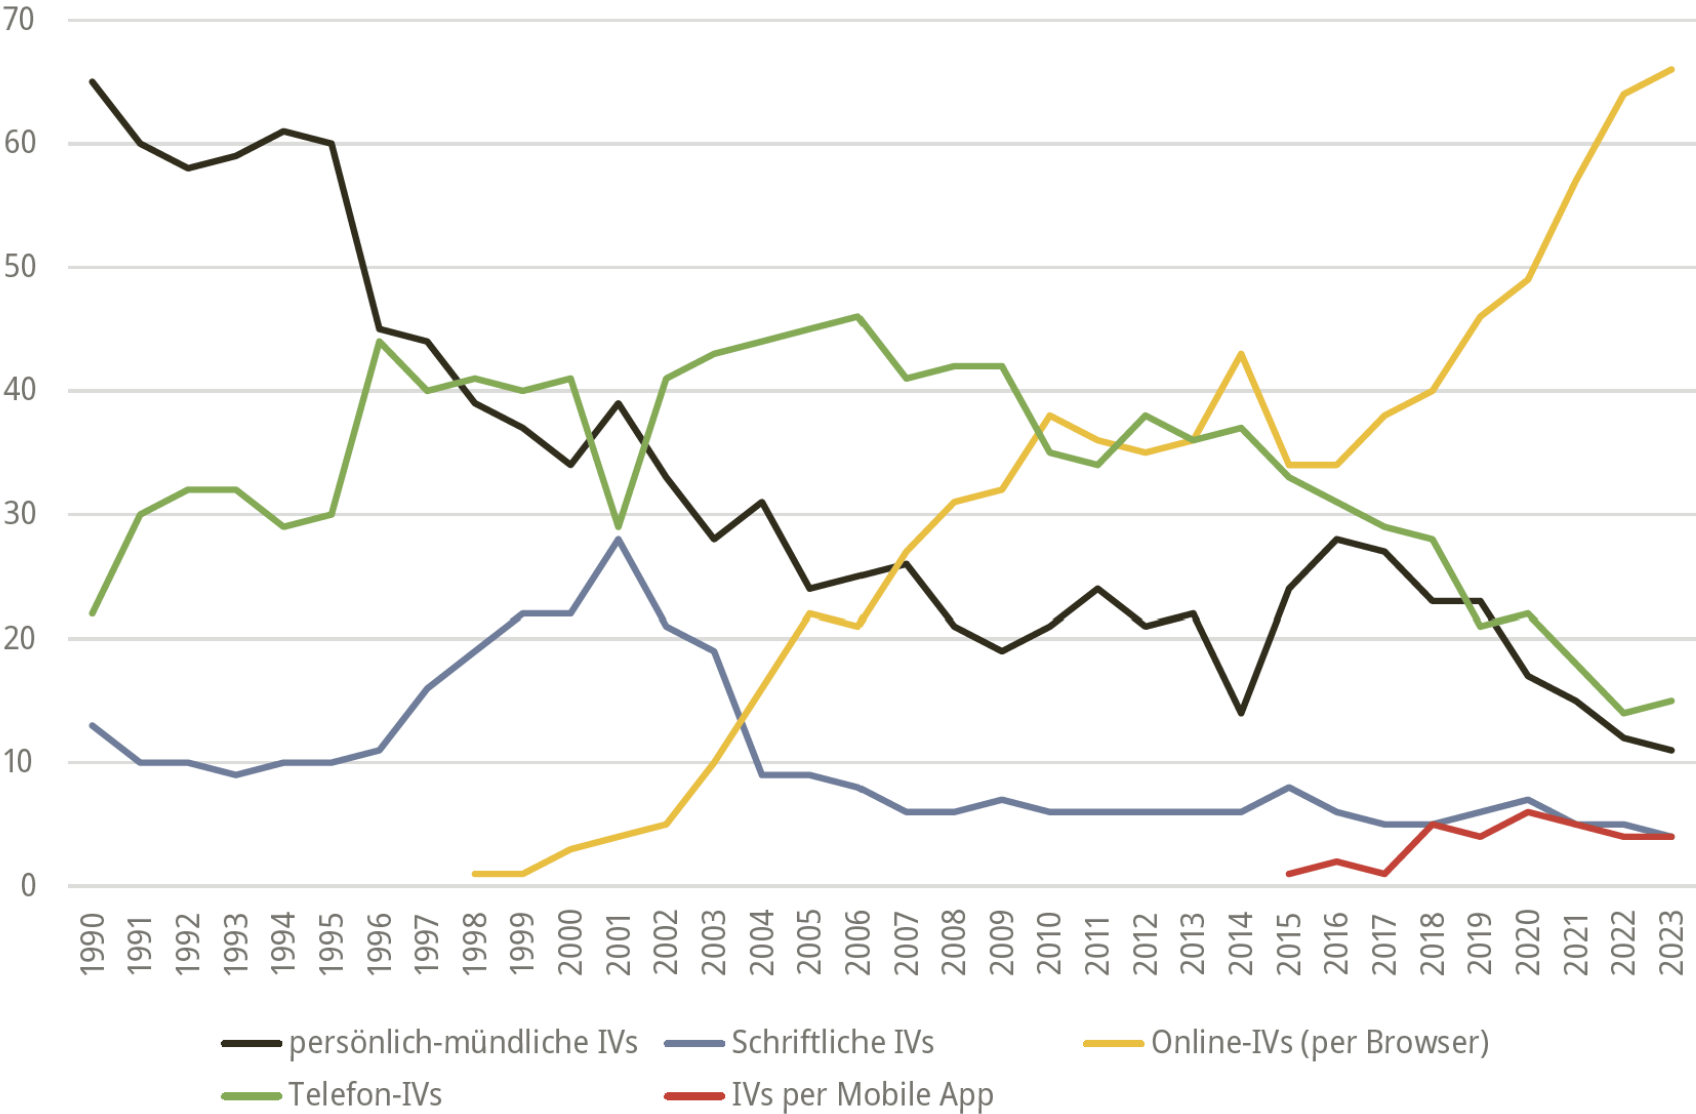

**Abb. 14:** Entwicklung unterschiedlicher Befragungsarten (Quelle: ADM 2024a).



Buch S. 48

**Tab. 10:** Vor- und Nachteile von schriftlichen Befragungen (Quelle: Eigene Abbildung).

| Kriterium                 | Vorteile                                                                                                                      | Nachteile                                                                                                                                            |
|---------------------------|-------------------------------------------------------------------------------------------------------------------------------|------------------------------------------------------------------------------------------------------------------------------------------------------|
| Abdeckung von Zielgruppen | <ul style="list-style-type: none"><li>– Alle Zielgruppen sind über den Wohnsitz prinzipiell erreichbar</li></ul>              | <ul style="list-style-type: none"><li>– Adressen der Zielpersonen müssen vorliegen oder gekauft werden</li></ul>                                     |
| Durchführungsprozess      | <ul style="list-style-type: none"><li>– Anonyme Befragungssituation</li><li>– Konzentrierte Beantwortung der Fragen</li></ul> | <ul style="list-style-type: none"><li>– Keine komplizierten Fragen möglich</li><li>– Keine Möglichkeit für Rückfragen bei der Beantwortung</li></ul> |
| Antwortbereitschaft       |                                                                                                                               | <ul style="list-style-type: none"><li>– Geringe Akzeptanz zur Rücksendung</li></ul>                                                                  |
| Kosten                    | <ul style="list-style-type: none"><li>– Keine Personalkosten für Interviewer</li></ul>                                        | <ul style="list-style-type: none"><li>– Hohe Kosten für Porto und Datenerfassung</li></ul>                                                           |



Buch S. 50

**Tab. 11:** Vor- und Nachteile von persönlichen Interviews (Quelle: Eigene Abbildung).

| Kriterium                 | Vorteile                                                                                                                                        | Nachteile                                                                                                          |
|---------------------------|-------------------------------------------------------------------------------------------------------------------------------------------------|--------------------------------------------------------------------------------------------------------------------|
| Abdeckung von Zielgruppen | <ul style="list-style-type: none"><li>– Zielgruppen werden im Umfeld des Interessensgegenstands rekrutiert</li></ul>                            |                                                                                                                    |
| Durchführungsprozess      | <ul style="list-style-type: none"><li>– Umfangreiche Befragung möglich</li><li>– Kein Vorabverständnis zur Kontaktaufnahme nach DSGVO</li></ul> | <ul style="list-style-type: none"><li>– Aufwendige Gestaltung der Fragebögen (Erfassung offener Angaben)</li></ul> |
| Antwortbereitschaft       | <ul style="list-style-type: none"><li>– Hohe Bereitschaft zur Teilnahme vor Ort bei Wartezeiten</li></ul>                                       | <ul style="list-style-type: none"><li>– Geringe Bereitschaft zur Teilnahme im eigenen Haus (Sicherheit)</li></ul>  |
| Kosten                    | <ul style="list-style-type: none"><li>– Bei CAPI-Einsatz keine Kosten für Datenerfassung</li></ul>                                              | <ul style="list-style-type: none"><li>– Hohe Personalkosten für Interviewer</li></ul>                              |



Buch S. 51

**Tab. 12:** Vor- und Nachteile von telefonischen Befragungen (Quelle: Eigene Abbildung).

| Kriterium                 | Vorteile                                                                                                                      | Nachteile                                                                                                                                           |
|---------------------------|-------------------------------------------------------------------------------------------------------------------------------|-----------------------------------------------------------------------------------------------------------------------------------------------------|
| Abdeckung von Zielgruppen | <ul style="list-style-type: none"><li>– Special Interest-Gruppen gut erreichbar (Panellisten)</li></ul>                       | <ul style="list-style-type: none"><li>– Rückläufige Verbreitung von Festnetztelefonen (Geo-Target)</li></ul>                                        |
| Durchführungsprozess      | <ul style="list-style-type: none"><li>– Schnelle Durchführung</li><li>– Kontrolle der Durchführung im Telefonstudio</li></ul> | <ul style="list-style-type: none"><li>– Keine Vorlage von Karten oder Bildern (Skalenproblematik)</li><li>– Eingeschränkter zeitl. Umfang</li></ul> |
| Antwortbereitschaft       |                                                                                                                               | <ul style="list-style-type: none"><li>– Festnetz- und Mobilfunkrufnummern vielfach gesperrt (call-blocker-apps)</li></ul>                           |
| Kosten                    | <ul style="list-style-type: none"><li>– Relativ günstige Durchführung durch CATI-Software (Rufnummernautomatik)</li></ul>     | <ul style="list-style-type: none"><li>– Mindestlohnvorgaben bei Personalkosten</li></ul>                                                            |



**Tab. 13:** Vor- und Nachteile von Online-Befragungen über Online-Access-Pools (Quelle: Eigene Abbildung).

| Kriterium                 | Vorteile                                                                        | Nachteile                                                           |
|---------------------------|---------------------------------------------------------------------------------|---------------------------------------------------------------------|
| Abdeckung von Zielgruppen | – Jüngere (weibliche) Probanden gut erreichbar                                  | – Ältere und spitze Zielgruppen kaum erreichbar                     |
| Durchführungsprozess      | – Schnelle Durchführung<br>– Einfache Integration von Bild- und Videomaterial   | – Bedenken bezüglich der Datensicherheit (sensible Fragen)          |
| Antwortbereitschaft       | – Antworten sehr kurzfristig verfügbar<br>– Dynamische Plausibilitätskontrollen | – Risiko von Manipulationen zur Erschleichung von Teilnahme-Prämien |
| Kosten                    | – Sehr günstige Durchführungskosten                                             |                                                                     |



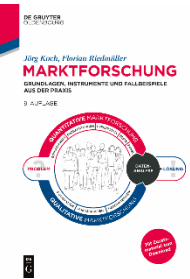

Buch S. 55

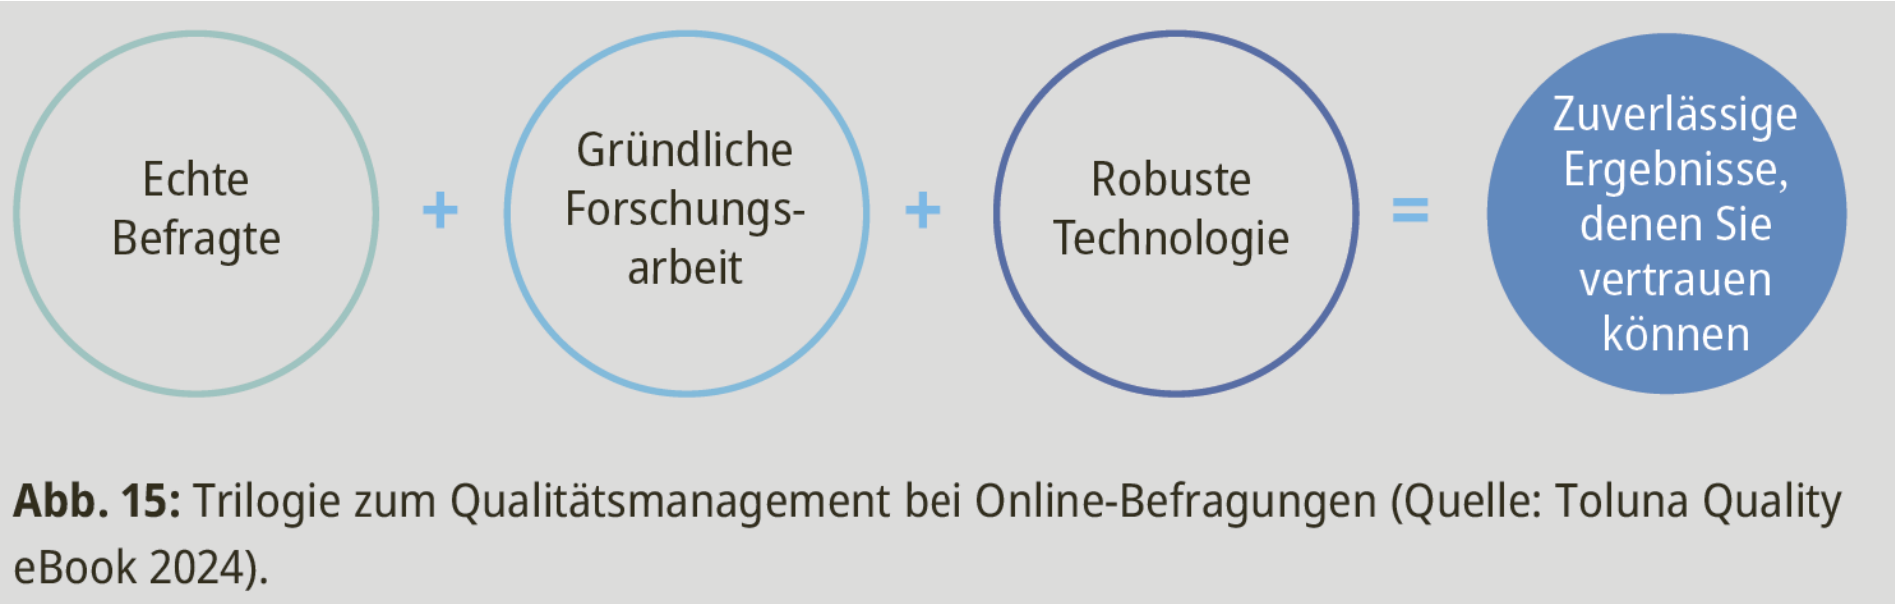

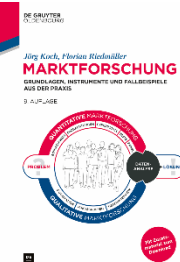

Buch S. 57

**Tab. 14:** Vor- und Nachteile von Befragungs-Apps (Quelle: Eigene Abbildung).

| Kriterium                 | Vorteile                                                                                                                        | Nachteile                                                                                                       |
|---------------------------|---------------------------------------------------------------------------------------------------------------------------------|-----------------------------------------------------------------------------------------------------------------|
| Abdeckung von Zielgruppen |                                                                                                                                 | <ul style="list-style-type: none"><li>– Rekrutierung nur über OnlineAccess-Panels möglich</li></ul>             |
| Durchführungsprozess      | <ul style="list-style-type: none"><li>– Sehr schnelle Durchführung</li><li>– Standortermittlung über GPS/ NFC möglich</li></ul> | <ul style="list-style-type: none"><li>– Nur kurze Befragungen möglich (ca. 50 % zu Online-Fragebögen)</li></ul> |
| Antwortbereitschaft       | <ul style="list-style-type: none"><li>– Antworten sehr kurzfristig verfügbar</li></ul>                                          | <ul style="list-style-type: none"><li>– Anreizsysteme können zur Antwortverzerrung führen</li></ul>             |
| Kosten                    | <ul style="list-style-type: none"><li>– Sehr günstige Durchführungskosten</li></ul>                                             |                                                                                                                 |



Buch S. 59

Tab. 15: Fragebogenentwicklung (Quelle: Wellenreuther 1982, S. 179).

| Phase der Fragebogenentwicklung                                                                                                          | Gesichtspunkte/Kriterien                                                                                                                                                                                                                                                                                                                                           |
|------------------------------------------------------------------------------------------------------------------------------------------|--------------------------------------------------------------------------------------------------------------------------------------------------------------------------------------------------------------------------------------------------------------------------------------------------------------------------------------------------------------------|
| 1. Präzisierung, Einengung des Themas, Klärung der zu erfragenden Inhalte, geordnet nach ihrer Bedeutsamkeit. Aufstellung von Hypothesen | <ul style="list-style-type: none"><li>– Entscheidungen über Ausmaß der Standardisierung; ob schriftliche oder mündliche Befragung (Interview)</li><li>– Analyse der Literatur zum Thema</li><li>– Entscheidung über Gruppen, die befragt werden sollen</li><li>– Intensives Erfragen eines Bereichs oder oberflächliches Abfragen verschiedener Bereiche</li></ul> |
| 2. Formulierung von Fragen zu den interessierenden Bereichen bzw. Hypothesen                                                             | <ul style="list-style-type: none"><li>– Balance der Fragen, Konkretheit, Verständlichkeit, Eindeutigkeit</li><li>– Trennung von unabhängigen und abhängigen Variablen</li><li>– Mischung geschlossener und offener Fragen (Adressatenkreis, Monotonie des Fragebogens, Präzision und objektive Auswertbarkeit der Fragen)</li></ul>                                |
| 3. Ordnung der Fragen in eine Reihenfolge                                                                                                | <ul style="list-style-type: none"><li>– Einleitung: Allg. Information, Motivierung, Zusicherung der Anonymität</li><li>– Aufwärmfragen</li><li>– Persönliche Fragen nicht an den Anfang</li><li>– Abhängigkeit vom Fragekontext: Kontrollgruppen</li></ul>                                                                                                         |
| 4. Überprüfung des Fragebogens                                                                                                           | <ul style="list-style-type: none"><li>– Pretest an ca. 20 Befragten</li><li>– Fragen nach Unebenheiten der Frageformulierung</li><li>– Statistische Auswertung (wenn nur eine Antwort auf eine Frage vorkommt, dann ist die Frage nicht informativ)</li></ul>                                                                                                      |
| 5. Vorbereitung der Hauptuntersuchung: Interviewerschulung und Auswahl der Stichprobe                                                    | <ul style="list-style-type: none"><li>– Versuchsplanung: Ist eine Variation der unabhängigen Variablen durch die Auswahl der Stichprobe möglich?</li><li>– Interviewerschulung</li><li>– Organisation von Adressenlisten usw.</li></ul>                                                                                                                            |



Buch S. 61

**Tab. 16:** Beispiel für den Einfluss unterschiedlicher Fragestellungen auf das Antwortverhalten  
(Quelle: Kreis/Wildner/Kuß 2024, S. 92).

|                             | Variante A                                                                                                                                                                                                                | Variante B                                                                                                                                                                                                                                                                                                                                    |
|-----------------------------|---------------------------------------------------------------------------------------------------------------------------------------------------------------------------------------------------------------------------|-----------------------------------------------------------------------------------------------------------------------------------------------------------------------------------------------------------------------------------------------------------------------------------------------------------------------------------------------|
| Fragentyp                   | Detaillierte Frage mit offener Antwortmöglichkeit                                                                                                                                                                         | Unbestimmte Frage mit geschlossener Ratingskala                                                                                                                                                                                                                                                                                               |
| Formulierung                | „Es gibt öfter mal Situationen, in denen man ein Bier trinkt, z. B. mit Kollegen, bei Feiern oder abends vor dem Fernseher. Wie viele Dosen Bier trinken Sie durchschnittlich pro Jahr?<br>ca. _____ Dosen Bier pro Jahr“ | „Wie viele Dosen Bier trinken Sie pro Jahr?<br><input type="checkbox"/> <sub>1</sub> bis zu 50 Dosen<br><input type="checkbox"/> <sub>2</sub> 51 bis 100 Dosen<br><input type="checkbox"/> <sub>3</sub> 101 bis 200 Dosen<br><input type="checkbox"/> <sub>4</sub> 201 bis 300 Dosen<br><input type="checkbox"/> <sub>5</sub> über 300 Dosen“ |
| Durchschnittliches Ergebnis | Ca. 320 Dosen Bier pro Jahr                                                                                                                                                                                               | Ca. 130 Dosen Bier pro Jahr                                                                                                                                                                                                                                                                                                                   |
| Erklärung                   | Durch die Informationen in der Fragestellung werden Erinnerungen aktiviert und gleichzeitig wird das negative Image des Alkoholkonsums abgeschwächt.                                                                      | Bei der getroffenen Kategorisierung vermeiden Befragte die höchste Angabe, um sich nicht als überdurchschnittlich hohe Bierkonsumenten zu outen (sozial unerwünschte Zuordnung).                                                                                                                                                              |



Buch S. 63

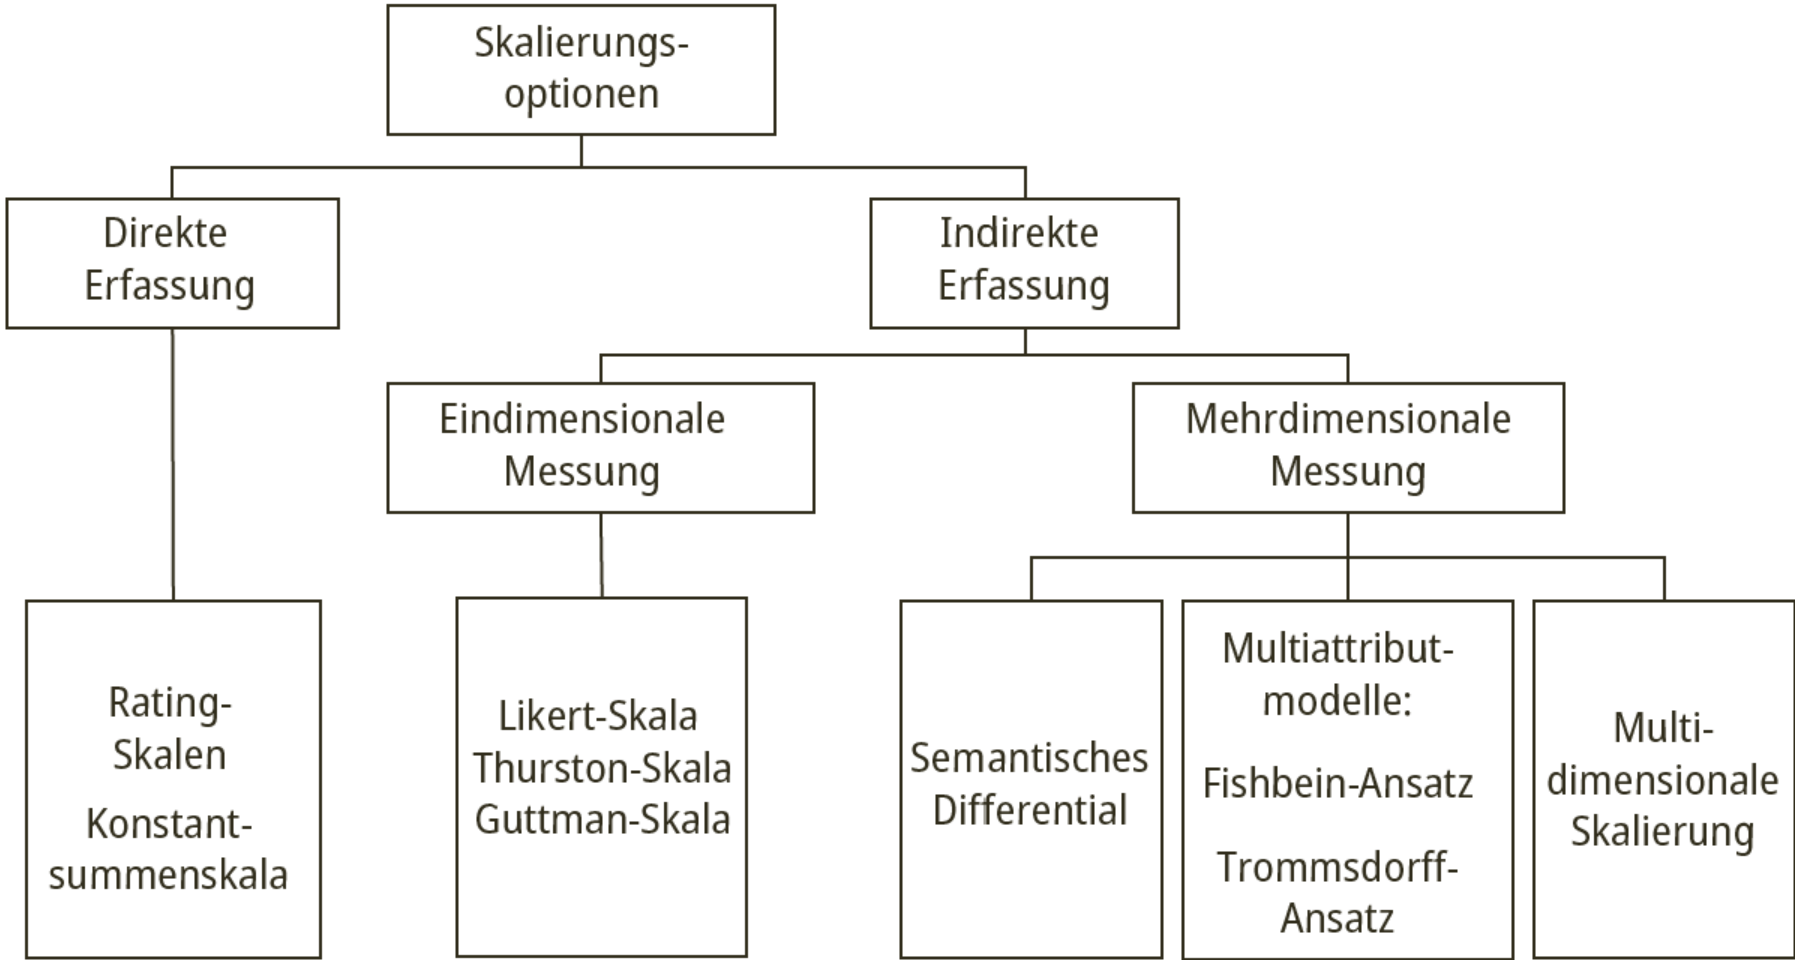

**Abb. 16:** Verbreitete Skalierungsverfahren (Quelle: Eigene Abbildung in Anlehnung an Berekoven/Eckert/ Ellenrieder 2009, S. 67).



Buch S. 64

**Tab. 17:** Möglichkeiten zum Einsatz von Rating-Skalen nach Balance und Anzahl der Skalenpunkte  
(Quelle: Eigene Abbildung) Exemplarische Fragestellung: „Wie gefällt Ihnen das Design des Sportschuhs XY?“.

| Anzahl der Skalenpunkte | Balance der Skalenpunkte                                                                                                                                                                                                                                                                 |          |                                                                                                                                                                                                                                                                                                                                |          |
|-------------------------|------------------------------------------------------------------------------------------------------------------------------------------------------------------------------------------------------------------------------------------------------------------------------------------|----------|--------------------------------------------------------------------------------------------------------------------------------------------------------------------------------------------------------------------------------------------------------------------------------------------------------------------------------|----------|
|                         | gerade                                                                                                                                                                                                                                                                                   |          | ungerade                                                                                                                                                                                                                                                                                                                       |          |
| niedrig                 | gut <input type="checkbox"/> <sub>1</sub> <input type="checkbox"/> <sub>2</sub> <input type="checkbox"/> <sub>3</sub> <input type="checkbox"/> <sub>4</sub><br><input type="checkbox"/> keine Angabe möglich                                                                             | schlecht | gut <input type="checkbox"/> <sub>1</sub> <input type="checkbox"/> <sub>2</sub> <input type="checkbox"/> <sub>3</sub><br><input type="checkbox"/> keine Angabe möglich                                                                                                                                                         | schlecht |
| hoch                    | gut <input type="checkbox"/> <sub>1</sub> <input type="checkbox"/> <sub>2</sub> <input type="checkbox"/> <sub>3</sub> <input type="checkbox"/> <sub>4</sub> <input type="checkbox"/> <sub>5</sub> <input type="checkbox"/> <sub>6</sub><br><input type="checkbox"/> keine Angabe möglich | schlecht | gut <input type="checkbox"/> <sub>1</sub> <input type="checkbox"/> <sub>2</sub> <input type="checkbox"/> <sub>3</sub> <input type="checkbox"/> <sub>4</sub> <input type="checkbox"/> <sub>5</sub> <input type="checkbox"/> <sub>6</sub> <input type="checkbox"/> <sub>7</sub><br><input type="checkbox"/> keine Angabe möglich | schlecht |



Buch S. 65

*Exemplarische Fragestellung: „Wie wichtig sind Ihnen die folgenden Aspekte beim Kauf eines Sportschuhs?“*

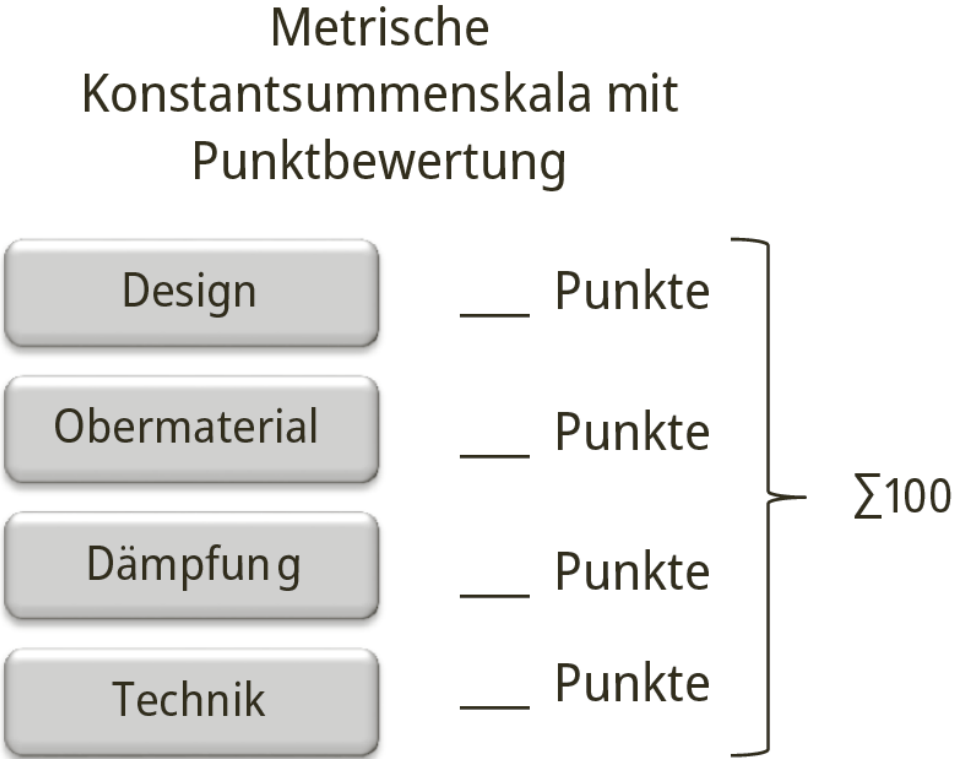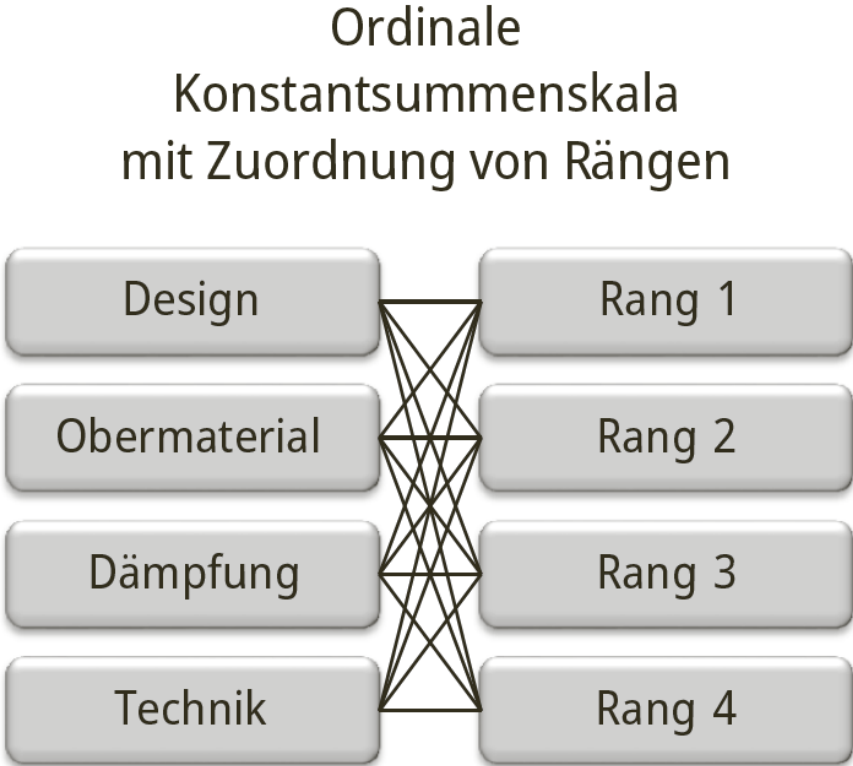

**Abb. 17:** Konstantsummenskala mit Punktbewertung und Zuordnung von Rängen (Quelle: Eigene Abbildung).



Buch S. 66

**Tab. 18:** Anwendungsbeispiel der Likert-Skala für die affektive Bewertung eines Sportschuhs (Quelle: Eigene Abbildung).

| Der Schuh ist ... | ... leicht | ... stabil | ... schön | ... weich | ... trendig | ... günstig |
|-------------------|------------|------------|-----------|-----------|-------------|-------------|
| Person 1          | +2         | +1         | +2        | +1        | +2          | +1          |
| Person 2          | +2         | -1         | 0         | -2        | -1          | 0           |
| Person 3          | -1         | -2         | -2        | -1        | -2          | -1          |
| Person 4          | +2         | +1         | +1        | +2        | +2          | +2          |
| Person 5          | -1         | 0          | +2        | +2        | -1          | -1          |
| Person 6          | +1         | -1         | +1        | -1        | +2          | +2          |
| Person 7          | -2         | -1         | -1        | -2        | -2          | -1          |
| Person 8          | 0          | -1         | -2        | -2        | +1          | 0           |





Buch S. 68

**Tab. 19:** Anwendungsbeispiel der Thurstone-Skala für die affektive Bewertung eines Sportschuhs (Quelle: Eigene Abbildung).

| Der Schuh ist ...                      | Experten-Bewertung |
|----------------------------------------|--------------------|
| ... mein absoluter Lieblings-Sneaker   | 11 = sehr positiv  |
| ... der Beste in seiner Klasse         | 10                 |
| ... ein Muss für Trendsetter           | 9                  |
| ... ein qualitativ hochwertiges Modell | 8                  |
| ... ein echt bequemer Sneaker          | 7                  |
| ... ein Klassiker                      | 6 = neutral        |
| ... nicht hochwertig verarbeitet       | 5                  |
| ... unbequem                           | 4                  |
| ... nicht mein Geschmack               | 3                  |
| ... ein klobiger Klotz                 | 2                  |
| ... ein Modell, das Loser tragen       | 1 = sehr negativ   |



Buch S. 68

**Tab. 20:** Anwendungsbeispiel der Guttman-Skala für die konative Bewertung eines Sportschuhs (Quelle: Eigene Abbildung).

| Der Schuh ist ...                                                | Score |
|------------------------------------------------------------------|-------|
| ... ein Modell, das ich schon mal gesehen habe                   | 1     |
| ... von einer Marke, die ich kenne                               | 2     |
| ... von einer Marke, von der ich schon andere Schuhe habe        | 3     |
| ... ein Modell, das ich mir im Angebot kaufen würde              | 4     |
| ... ein Modell, das ich auch zum regulären Preis kaufen würde    | 5     |
| ... ein Modell, das ich sicher meinen Freunden zum Kauf empfehle | 6     |

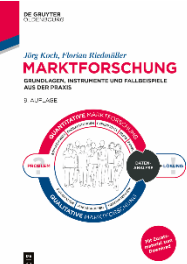

Buch S. 70

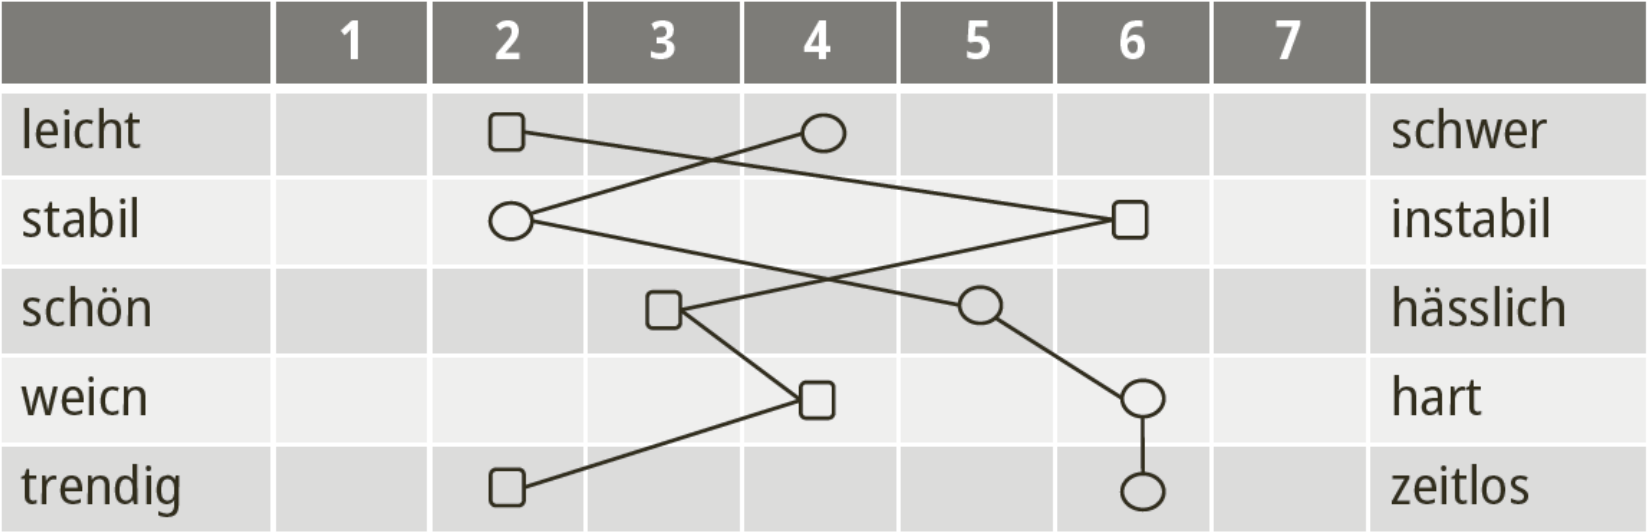

□ = j      ○ = k

$$D_{jk} = \sqrt{2^2 + 4^2 + 2^2 + 2^2 + 4^2}$$
$$= \sqrt{4 + 16 + 4 + 4 + 16} = \sqrt{44} = 6,6$$

**Abb. 18:** Semantisches Differential inkl. Euklidisches Distanzmaß für zwei Sportschuhe (Quelle: Eigene Abbildung).



Buch S. 72

**Tab. 21:** Anwendungsbeispiel der Fishbein-Skalierung für die Bewertung eines Sportschuhs (Quelle: Eigene Abbildung).

| Eigenschaften          | $A_{ij}$ : affektive Komponente | × | $B_{ij}$ : kognitive Komponente | = | Eindruckswert |
|------------------------|---------------------------------|---|---------------------------------|---|---------------|
| leicht                 | 2                               |   | 5                               |   | 10            |
| stabil                 | 5                               |   | 2                               |   | 10            |
| schön                  | 5                               |   | 4                               |   | 20            |
| weich                  | 4                               |   | 4                               |   | 16            |
| trendig                | 3                               |   | 2                               |   | 6             |
| <b>Gesamtbewertung</b> |                                 |   |                                 |   | <b>62</b>     |



Buch S. 73

**Tab. 22:** Anwendungsbeispiel der Trommsdorff-Skalierung für die Bewertung eines Sportschuhs (Quelle: Eigene Abbildung).

| Eigenschaften          | $I_{ij}$ : affektive Komponente | – | $B_{ij}$ : kognitive Komponente | = | Eindruckswert |
|------------------------|---------------------------------|---|---------------------------------|---|---------------|
| leicht                 | 4                               |   | 5                               |   | 1             |
| stabil                 | 5                               |   | 2                               |   | 3             |
| schön                  | 5                               |   | 4                               |   | 1             |
| weich                  | 3                               |   | 4                               |   | 1             |
| trendig                | 5                               |   | 2                               |   | 3             |
| <b>Gesamtbewertung</b> |                                 |   |                                 |   | <b>9</b>      |

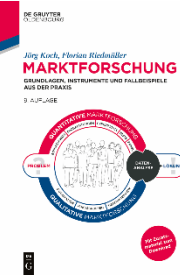

Buch S. 74

1. Erhebung der Ähnlichkeiten

| ähnlich | 1 | 2 | 3 | 4 | 5 | unähnlich |
|---------|---|---|---|---|---|-----------|
| Schuh 1 |   |   |   |   |   | Schuh 2   |
| Schuh 1 |   |   |   |   |   | Schuh 3   |
| Schuh 1 |   |   |   |   |   | Schuh 4   |
| Schuh 2 |   |   |   |   |   | Schuh 3   |
| ...     |   |   |   |   |   | ...       |

2. Generierung einer Distanzmatrix

|         | Schuh 1 | Schuh 2 | Schuh 3 | Schuh 4 |
|---------|---------|---------|---------|---------|
| Schuh 1 | x       | 1,2     | 3,2     | 3,5     |
| Schuh 2 |         | x       | 2,8     | 3,1     |
| Schuh 3 |         |         | x       | 1,3     |
| Schuh 4 |         |         |         | x       |

3. Ableitung einer Konfiguration im Raum

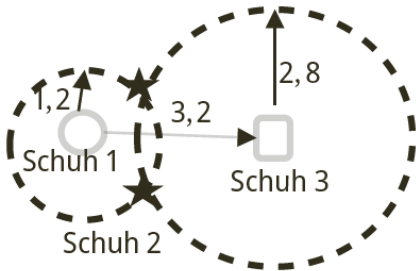

4. Ermittlung von Attributvektoren

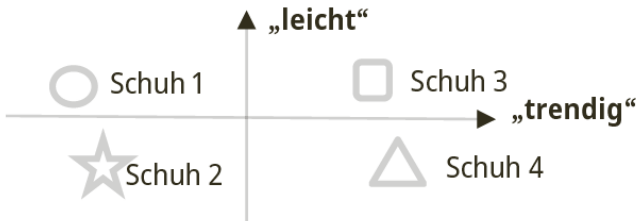

**Abb. 19:** Multidimensionale Skalierung zur Ermittlung von Unterschieden zwischen Sportschuhen (Quelle: Eigene Abbildung).



Buch S. 80

**Tab. 23:** Untersuchungssituationen im Rahmen der Beobachtung (Quelle: Berekoven/Eckert/Ellenrieder 2009, S. 142).

| Bewusstseinsgrad               | Wissen um den Versuchszweck | Wissen um die Aufgabe | Wissen um die Versuchssituation |
|--------------------------------|-----------------------------|-----------------------|---------------------------------|
| Benennung der Situation        |                             |                       |                                 |
| Offene Situation               | Ja                          | Ja                    | Ja                              |
| Nicht-durchschaubare Situation | Nein                        | Ja                    | Ja                              |
| Quasibiotische Situation       | Nein                        | Nein                  | Ja                              |
| (Voll-) biotische Situation    | Nein                        | Nein                  | Nein                            |



Buch S. 81

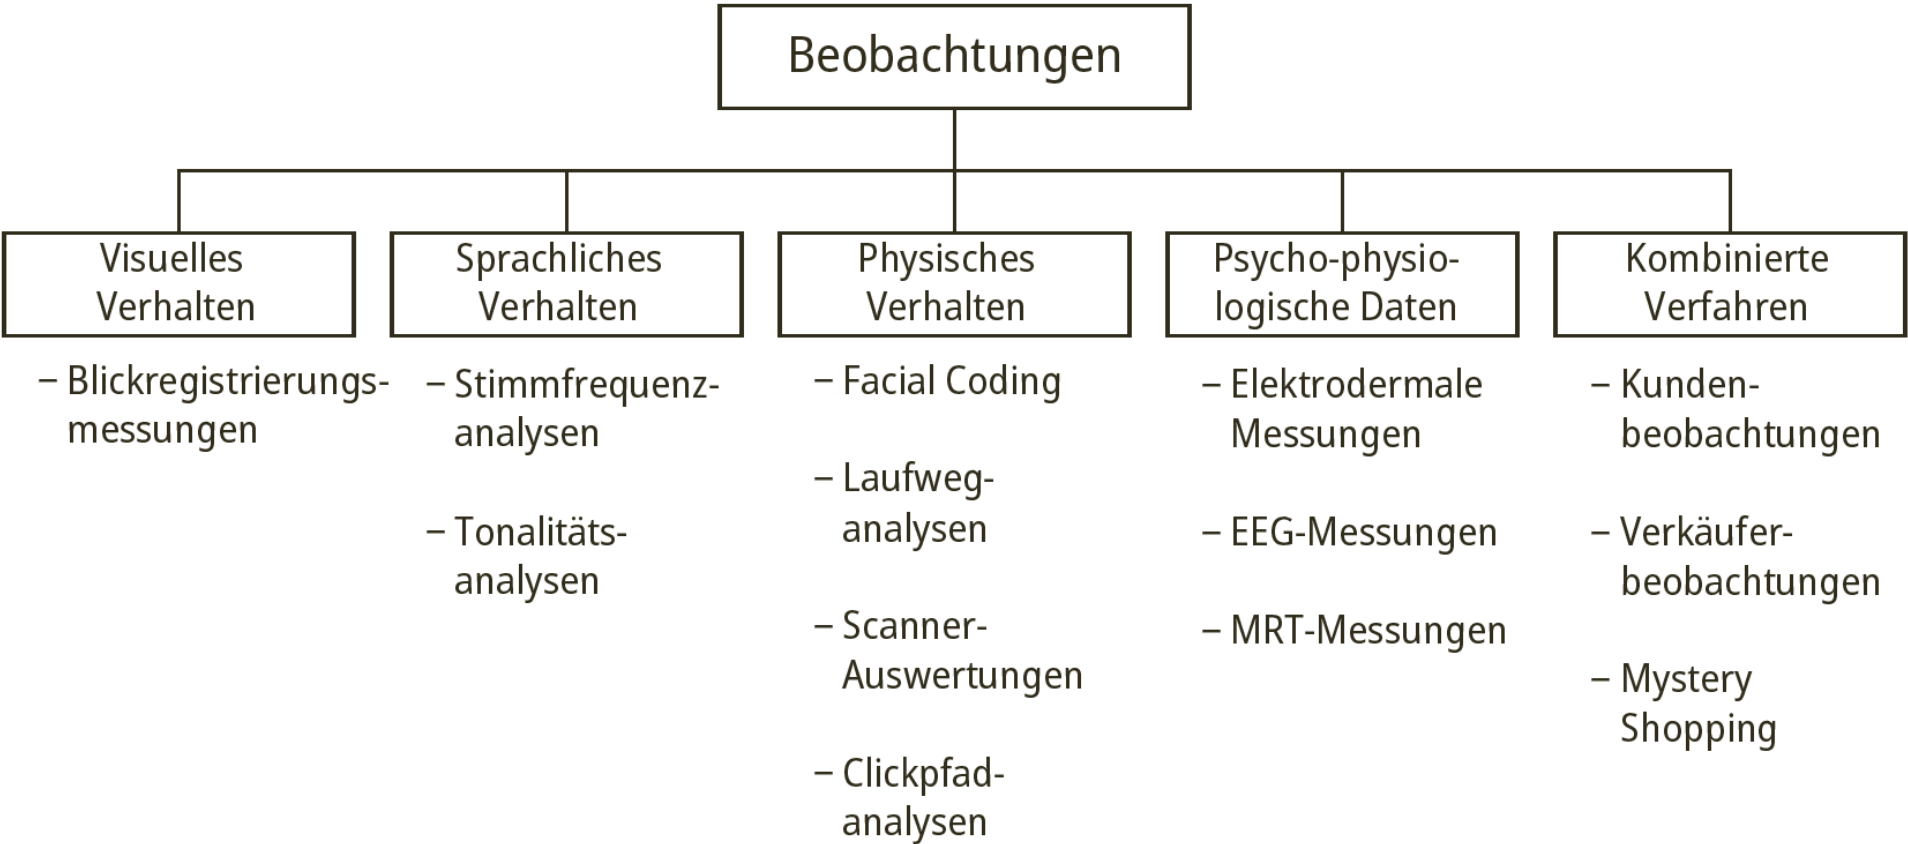

**Abb. 20:** Sensorische Differenzierung von Beobachtung mit wichtigen Anwendungsbeispielen (Quelle: Eigene Abbildung).



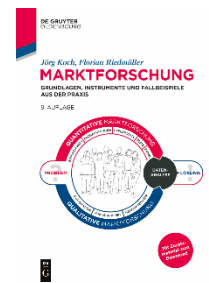

Buch S. 82

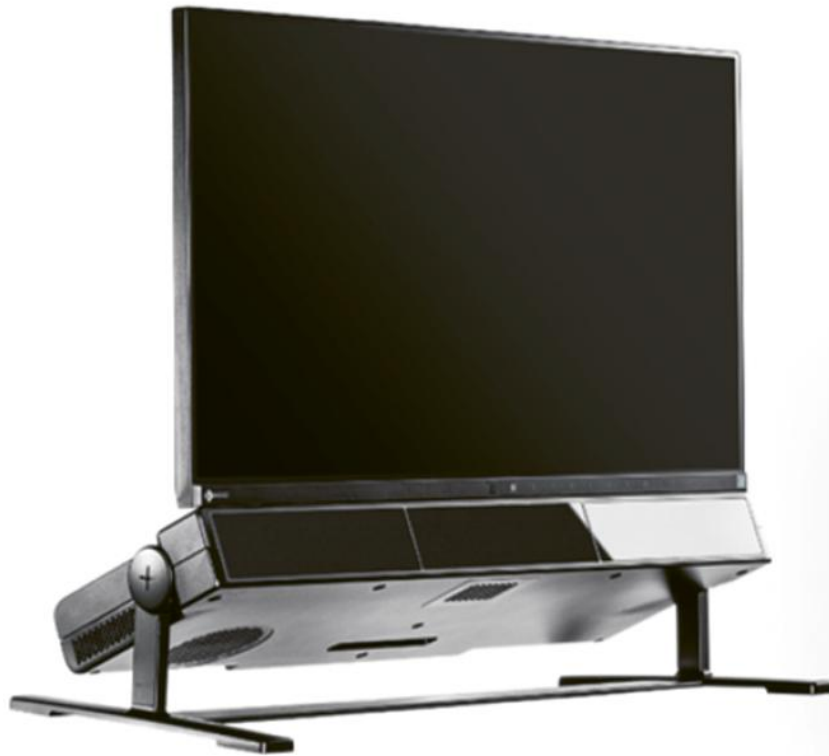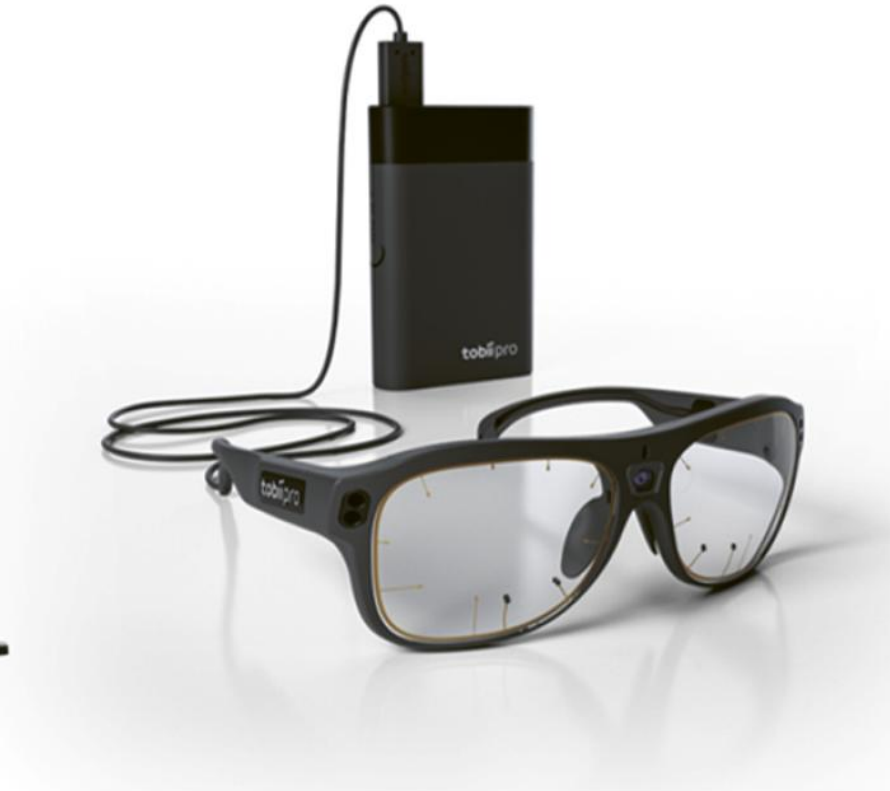

**Abb. 21:** Monitor- und Brillenbasierte Eye-Tracking-Systeme des Unternehmens Tobii (Quelle: <http://www.tobii.com>).



Buch S. 83

**Tab. 24:** Vor- und Nachteile von Blickregistrierungsmessungen (Quelle: Eigene Abbildung).

| Kriterium    | Vorteile                                                                                  | Nachteile                                                                                       |
|--------------|-------------------------------------------------------------------------------------------|-------------------------------------------------------------------------------------------------|
| Rekrutierung | – Interesse an der Teilnahme an videobasierten Studien                                    | – Probanden können evtl. nicht gemessen werden (z. B. Sehschwäche, Verwendung von Mascara, ...) |
| Aufzeichnung | – Präzise Messungen bei digitalen Stimuli (stationär) oder Abstand von 1–5 Metern (mobil) | – Gute Lichtverhältnisse ohne direkte Sonneneinstrahlung müssen gegeben sein                    |
| Auswertung   | – Automatische Auswertung von Visualisierungen und Kennzahlen                             | – Hoher Kodierungsaufwand bei dynamischen Stimuli (Videos) und Objekten im Raum                 |
| Kosten       |                                                                                           | – Hohe Hardware- und Laborkosten                                                                |

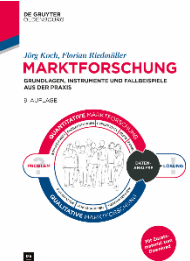

Buch S. 84

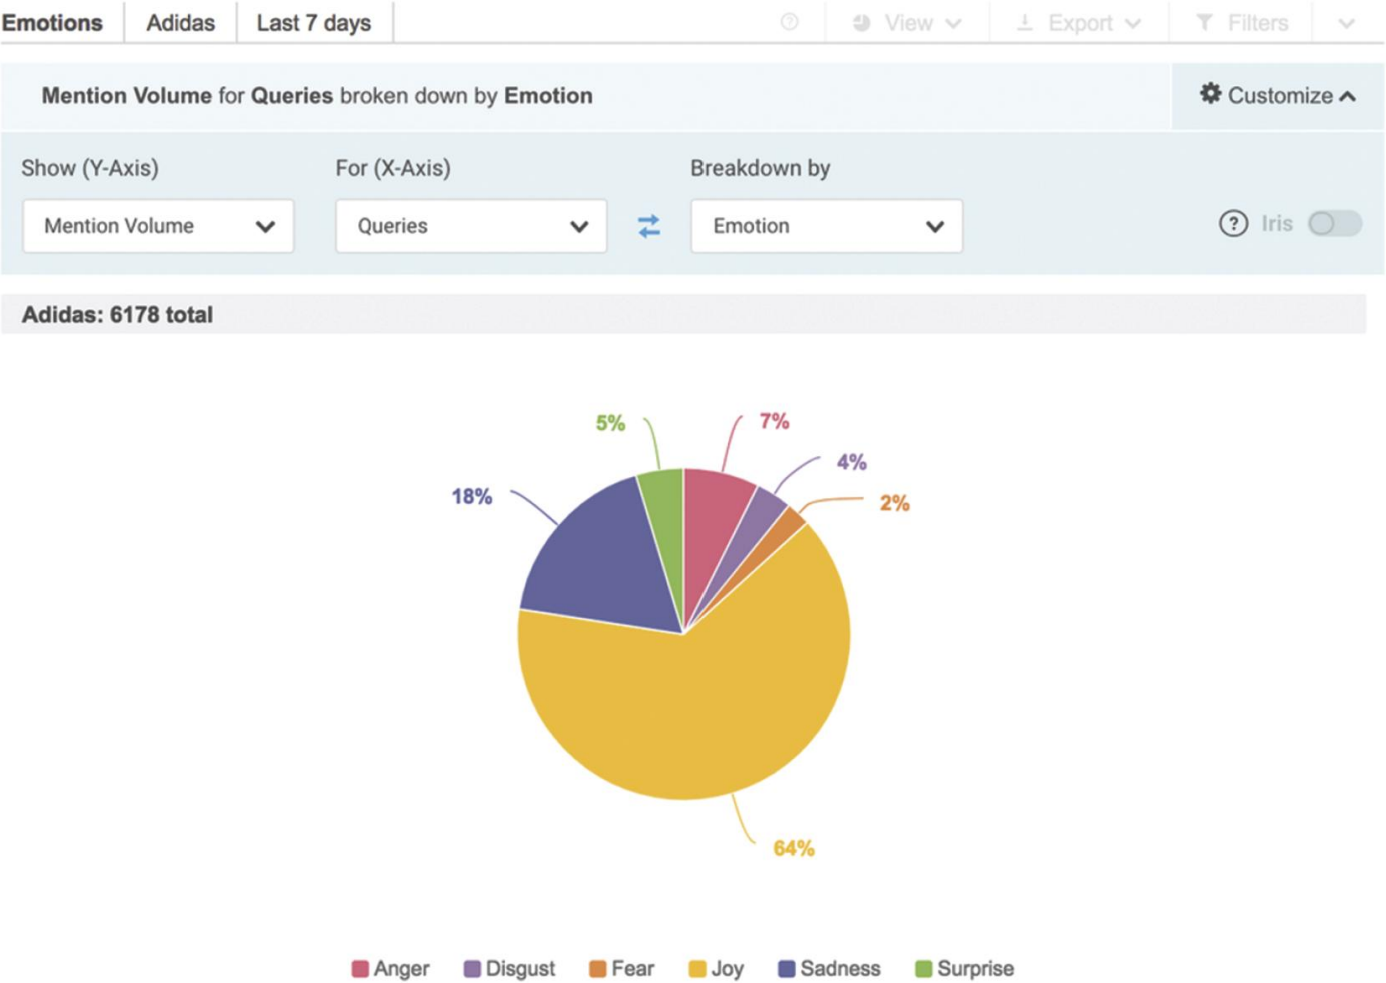

**Abb. 22:** Exemplarische Tonalitätsanalyse für die Marke adidas (Quelle: <https://www.brandwatch.com/blog/sentiment-analysis-tools/>).



Buch S. 86

**Tab. 26:** Vor- und Nachteile von Facial Coding (Quelle: Eigene Abbildung).

| Kriterium    | Vorteile                                                                                                                 | Nachteile                                                                                                                                                                         |
|--------------|--------------------------------------------------------------------------------------------------------------------------|-----------------------------------------------------------------------------------------------------------------------------------------------------------------------------------|
| Rekrutierung |                                                                                                                          | <ul style="list-style-type: none"><li>– Hohe Verweigerungsraten aufgrund von persönlichen Bilddaten</li></ul>                                                                     |
| Aufzeichnung | <ul style="list-style-type: none"><li>– Einfache Erfassung über freigeschaltete Smartphone- und Laptop-Kameras</li></ul> |                                                                                                                                                                                   |
| Auswertung   | <ul style="list-style-type: none"><li>– Grundemotionen können zuverlässig ausgelesen werden</li></ul>                    | <ul style="list-style-type: none"><li>– Veränderung der Mimik tritt nur bei starken Stimuli auf</li><li>– Verzögerungen von der Wahrnehmung bis zu Änderungen der Mimik</li></ul> |
| Kosten       | <ul style="list-style-type: none"><li>– Niedrige Aufzeichnungskosten</li></ul>                                           | <ul style="list-style-type: none"><li>– Lizenz für den Zugang zu einem Auswertungslogarithmus erforderlich (z. B. SHORE® von Fraunhofer IIS)</li></ul>                            |



Buch S. 87

| Technologie | Indoor/Outdoor                                                                      | Genauigkeit                                                                                      | Reichweite                                                                                     |
|-------------|-------------------------------------------------------------------------------------|--------------------------------------------------------------------------------------------------|------------------------------------------------------------------------------------------------|
| GPS         |   | <br>5–20 m    | global                                                                                         |
| WLAN        |   | <br>5–15 m    | <br>< 150 m |
| BLE         |   | <br>1–3 m     | <br>< 30 m  |
| Li-Fi (VLC) |  | <br>< 50 cm | <br>< 8 m |

**Abb. 23:** Vergleich verschiedener Technologien für clientseitige indoor Positionsbestimmung (Quelle: <http://www.infsoft.com>).



Buch S. 88

**Tab. 27:** Vor- und Nachteile von Laufweganalysen (Quelle: Eigene Abbildung).

| Kriterium    | Vorteile                                                                     | Nachteile                                                                          |
|--------------|------------------------------------------------------------------------------|------------------------------------------------------------------------------------|
| Rekrutierung | – Kann zum Teil ohne die explizite Zustimmung der Kunden durchgeführt werden | – Aktivierung einer App, bzw. WLAN-, Bluetooth- oder Sicht-Verbindung notwendig    |
| Aufzeichnung |                                                                              | – Sehr aufwendig, da alle potenziellen Laufwege und POIs antizipiert werden müssen |
| Auswertung   | – Qualitative Erkenntnisse zu zentralen Störfaktoren                         | – Unschärfe, da Interaktionen nicht im Detail verfolgt werden können               |
| Kosten       |                                                                              | – Sehr hohe Installationskosten und personalintensive Auswertung                   |

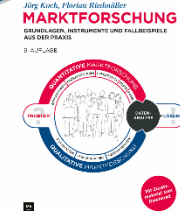

Buch S. 89

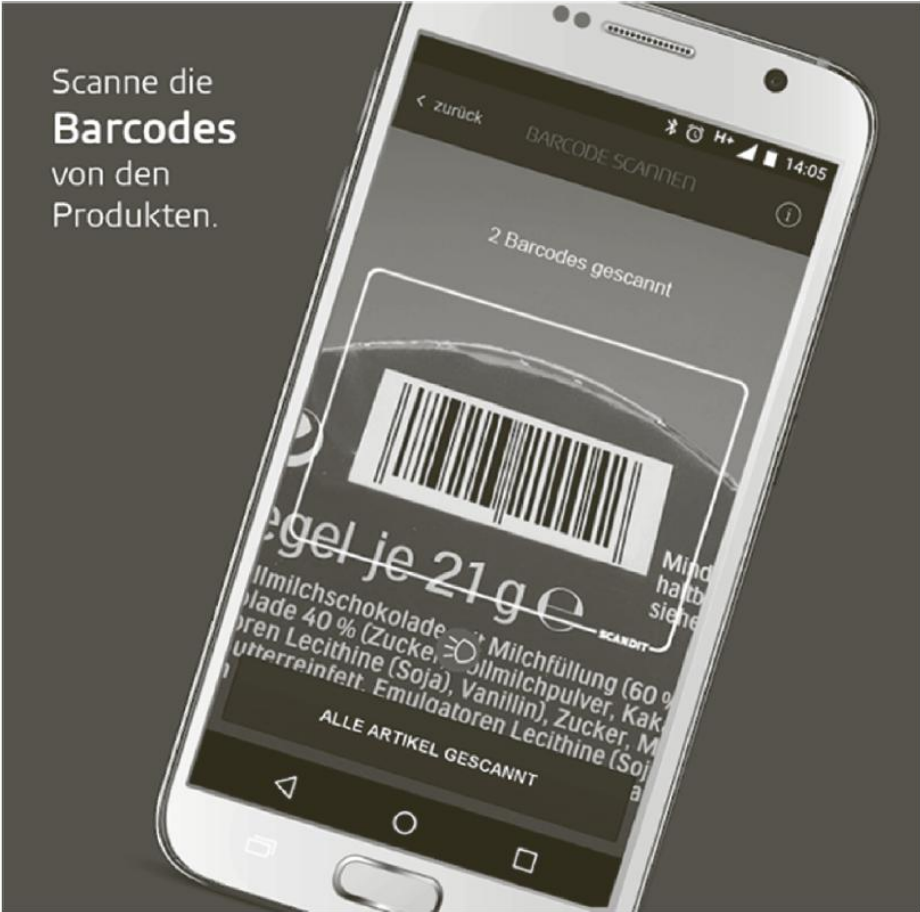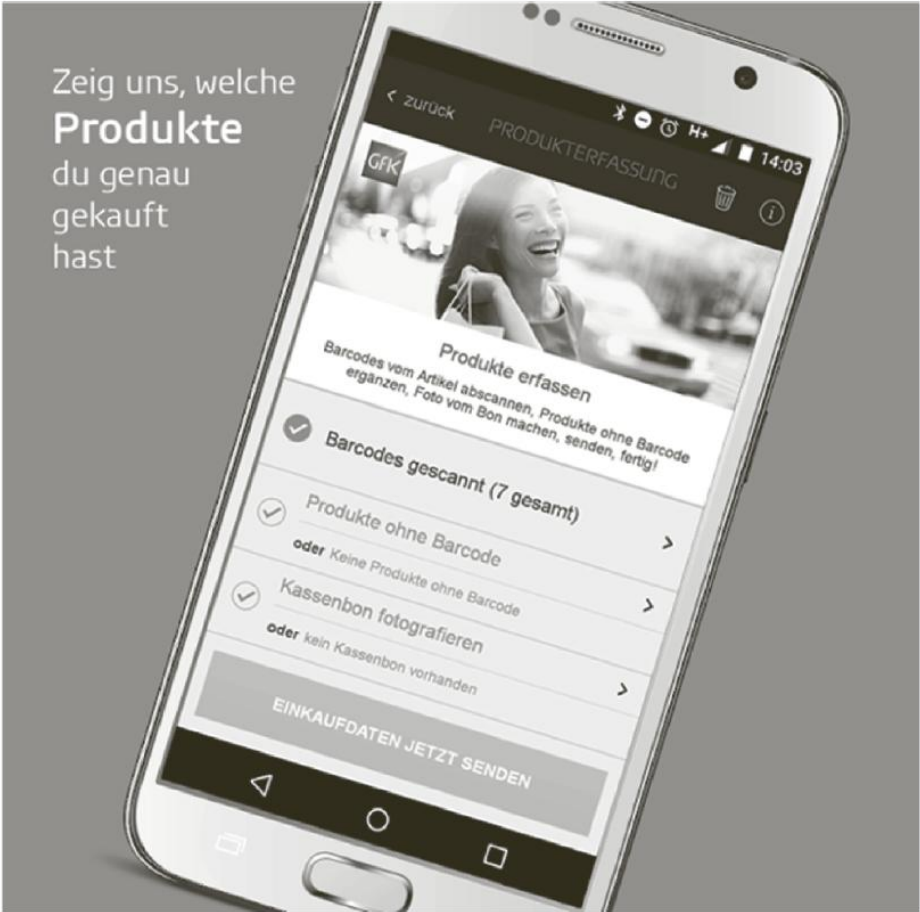

**Abb. 24:** Scannererfassung mit der YouGov SmartScan App (Quelle: <https://machmit.shopper.yougov.com/de>).





Buch S. 89

**Tab. 28:** Vor- und Nachteile von scannergestützten Beobachtungen (Quelle: Eigene Abbildung).

| Kriterium    | Vorteile                                                                                       | Nachteile                                                              |
|--------------|------------------------------------------------------------------------------------------------|------------------------------------------------------------------------|
| Rekrutierung |                                                                                                | – Hohe Aufwendungen zur Akquisition von vertrauenswürdigen Teilnehmern |
| Aufzeichnung | – Reale Einkaufsdaten inklusive (Aktions-)Preisinformationen                                   | – Aufwendiges zweistufiges Verfahren durch Scan und Texteingabe        |
| Auswertung   | – Zielgruppenspezifische Analysen<br>– Kombination von Daten aus Verbraucher- und Handelspanel |                                                                        |
| Kosten       | – Trend zu Electronic-Payment ermöglicht Automatisierung                                       | – Kostenintensive Betreuung und Vergütung der Scan-Teilnehmer          |





**Tab. 29:** Vor- und Nachteile von Klickpfadanalysen (Quelle: Eigene Abbildung).

| Kriterium    | Vorteile                                                                     | Nachteile                                                                                    |
|--------------|------------------------------------------------------------------------------|----------------------------------------------------------------------------------------------|
| Rekrutierung | – Für site-centric Analysen nicht notwendig                                  | – Zustimmung für user-centric Aufzeichnungen unter Beachtung von DSGVO-Richtlinien notwendig |
| Aufzeichnung | – Automatische Erfassung aller site-centric Bewegungen über Logfile-Analysen |                                                                                              |
| Auswertung   | – Standardisierte Kennzahlen über Google-Analytics, etc.                     | – Herausforderung im Umgang mit großen Datenmengen                                           |
| Kosten       | – Bei entsprechendem Know-how gering                                         |                                                                                              |



**Tab. 30:** Vor- und Nachteile von elektrodermalen Beobachtungen (Quelle: Eigene Abbildung).

| Kriterium    | Vorteile                                                                                                      | Nachteile                                                                                                                               |
|--------------|---------------------------------------------------------------------------------------------------------------|-----------------------------------------------------------------------------------------------------------------------------------------|
| Rekrutierung |                                                                                                               | <ul style="list-style-type: none"><li>– Hohes Misstrauen gegenüber der Aufzeichnung von biometrischen Daten</li></ul>                   |
| Aufzeichnung | <ul style="list-style-type: none"><li>– Einfache Erfassung über Anlegen von Elektroden auf der Haut</li></ul> | <ul style="list-style-type: none"><li>– Hautleitfähigkeit ist ein relativ langsames Körpersignal (Verzögerungsraten erfassen)</li></ul> |
| Auswertung   | <ul style="list-style-type: none"><li>– Einfache Interpretation des Aktivierungslevels</li></ul>              | <ul style="list-style-type: none"><li>– Keine Aussage über positive oder negative Auslöser von Ausschlägen</li></ul>                    |
| Kosten       | <ul style="list-style-type: none"><li>– Einfaches Messverfahren ohne große Vorbereitungen</li></ul>           |                                                                                                                                         |

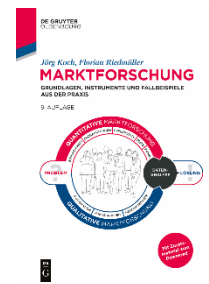

Buch S. 92

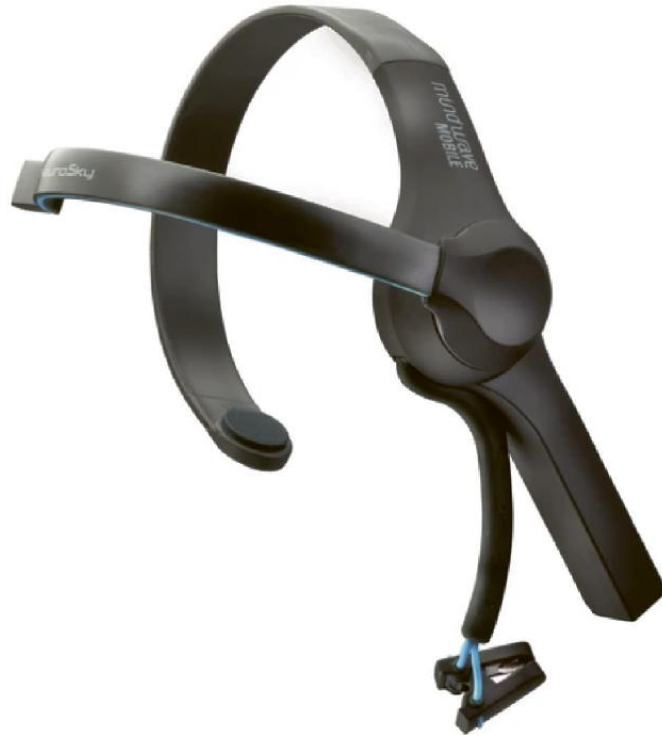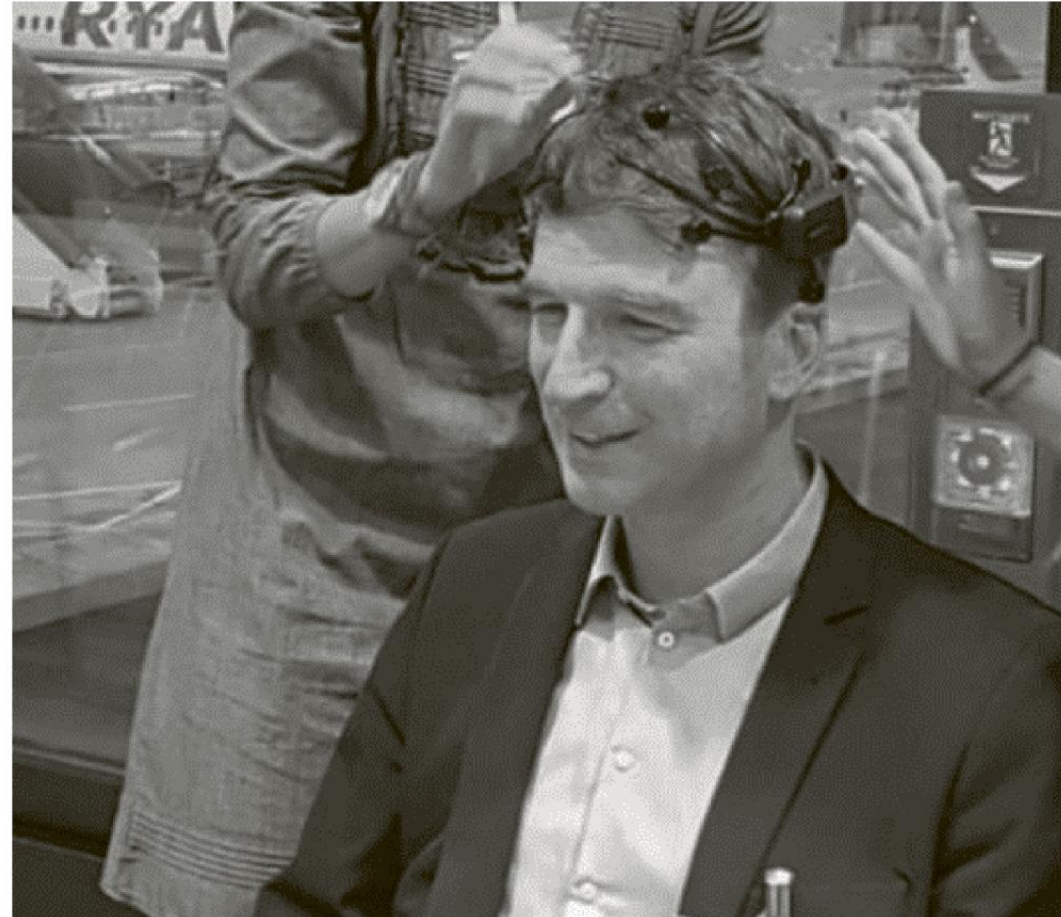

**Abb. 25:** Einfache Headset-Lösungen zur EEG-Messung (Quelle: <http://www.neurosky.com>);  
eigenes Foto.



**Tab. 31:** Vor- und Nachteile von neurophysiologischen Beobachtungen (Quelle: Eigene Abbildung).

| Kriterium    | Vorteile                                                                                                                           | Nachteile                                                                                                                                          |
|--------------|------------------------------------------------------------------------------------------------------------------------------------|----------------------------------------------------------------------------------------------------------------------------------------------------|
| Rekrutierung |                                                                                                                                    | <ul style="list-style-type: none"><li>– Bereitschaft zur Teilnahme an Studien unter klinischen Bedingungen</li></ul>                               |
| Aufzeichnung | <ul style="list-style-type: none"><li>– Standardisierte Hard- und Software zur Aufzeichnung von Neuro-Signalen verfügbar</li></ul> | <ul style="list-style-type: none"><li>– Sehr aufwendige Durchführung von präzisen Messungen unter Ausschaltung zahlreicher Störvariablen</li></ul> |
| Auswertung   |                                                                                                                                    | <ul style="list-style-type: none"><li>– Medizinisches Fachwissen zur Interpretation von Wellen und Bildern</li></ul>                               |
| Kosten       |                                                                                                                                    | <ul style="list-style-type: none"><li>– Hohe Auswertungskosten für medizinische Experten</li></ul>                                                 |



Buch S. 94

**Tab. 32:** Vor- und Nachteile von Mystery Shopping (Quelle: Eigene Abbildung).

| Kriterium    | Vorteile                                                                                                         | Nachteile                                                                                                                                |
|--------------|------------------------------------------------------------------------------------------------------------------|------------------------------------------------------------------------------------------------------------------------------------------|
| Rekrutierung |                                                                                                                  | <ul style="list-style-type: none"><li>– Aufwendige Akquisition und Schulung qualifizierter Testkäufer</li></ul>                          |
| Aufzeichnung | <ul style="list-style-type: none"><li>– Möglichkeit zur detaillierten Prüfung realer Kaufinteraktionen</li></ul> | <ul style="list-style-type: none"><li>– Unschärfe durch den zeitlichen Gap zwischen Testsituation und Ausfüllen des Protokolls</li></ul> |
| Auswertung   |                                                                                                                  | <ul style="list-style-type: none"><li>– Großer Spielraum bei der Interpretation von Testkaufbewertungen</li></ul>                        |
| Kosten       | <ul style="list-style-type: none"><li>– Refinanzierung über höhere Beratungsqualität</li></ul>                   | <ul style="list-style-type: none"><li>– Aufwendige Zusammenfassung qualitativer Aussagen</li></ul>                                       |

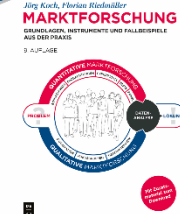

Buch S. 99

Simultanexperiment (EB-CA):

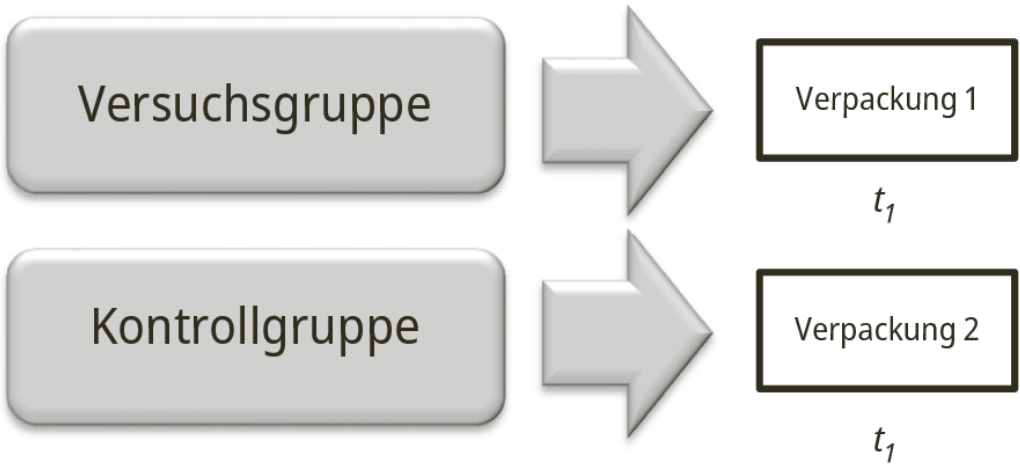

Sukzessivexperiment (EBA):

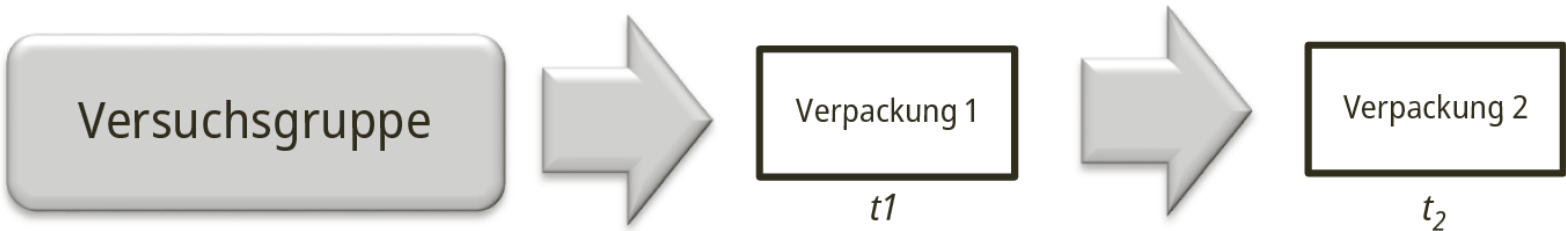

**Abb. 26:** Aufbau von Simultan- und Sukzessivexperimenten am Beispiel eines A/B-Tests (Quelle: Eigene Abbildung).

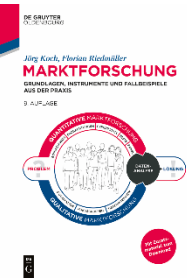

Buch S. 100

## Matched Sample Experiment (EBA-CBA):

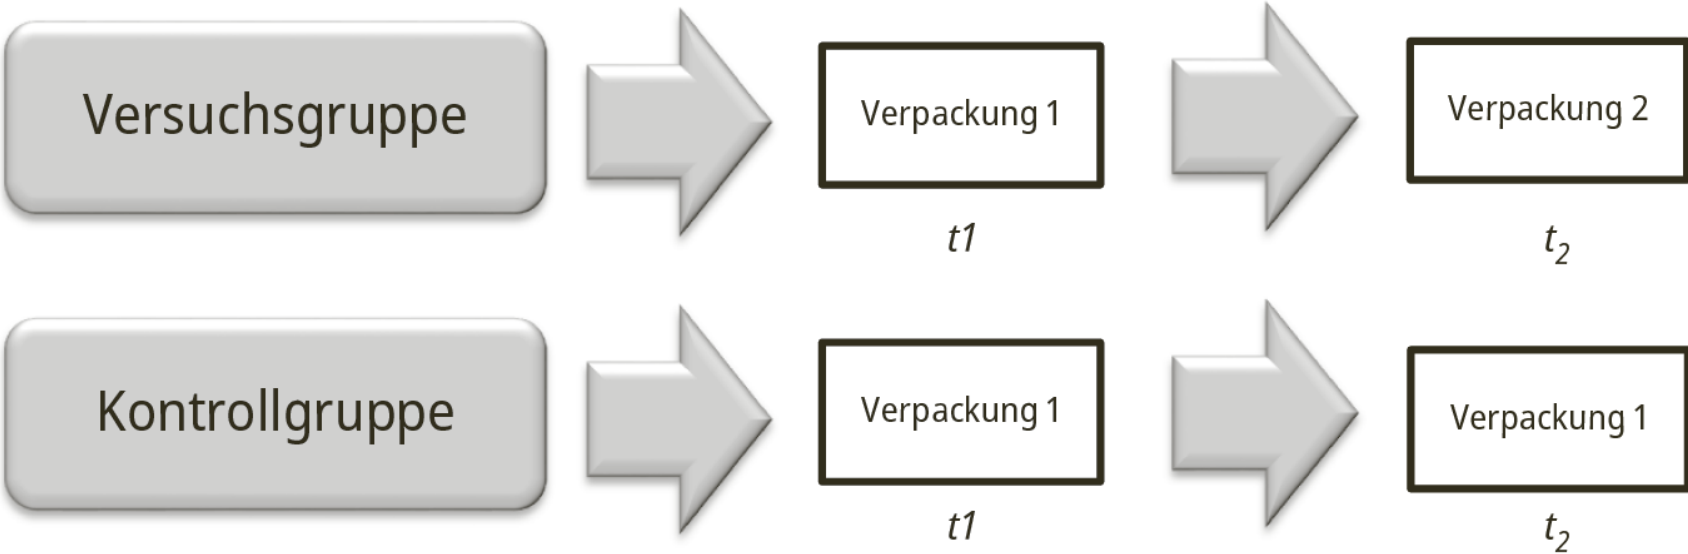

**Abb. 27:** Aufbau eines Matched Sample Experiments am Beispiel eines A/B-Tests (Quelle: Eigene Abbildung).

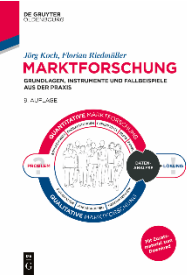

Buch S. 101

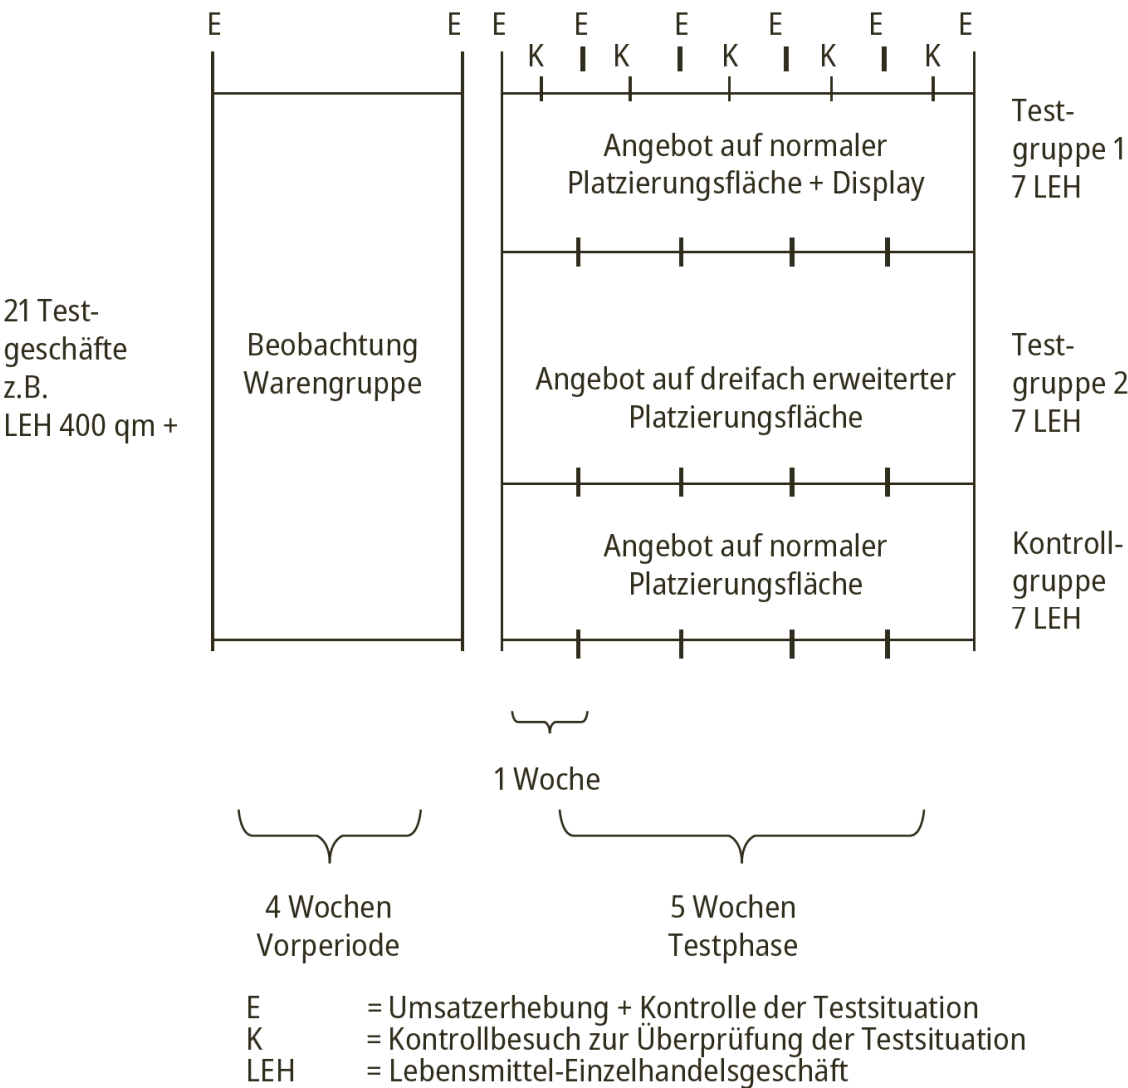

**Abb. 28:** Praxisbeispiel eines Matched Samples für einen Platzierungstest im Lebensmittelhandel (Quelle: Unger 1997, S. 301).





Buch S. 102

## Simultanes Sukzessivexperiment (EA-EBA-CBA):

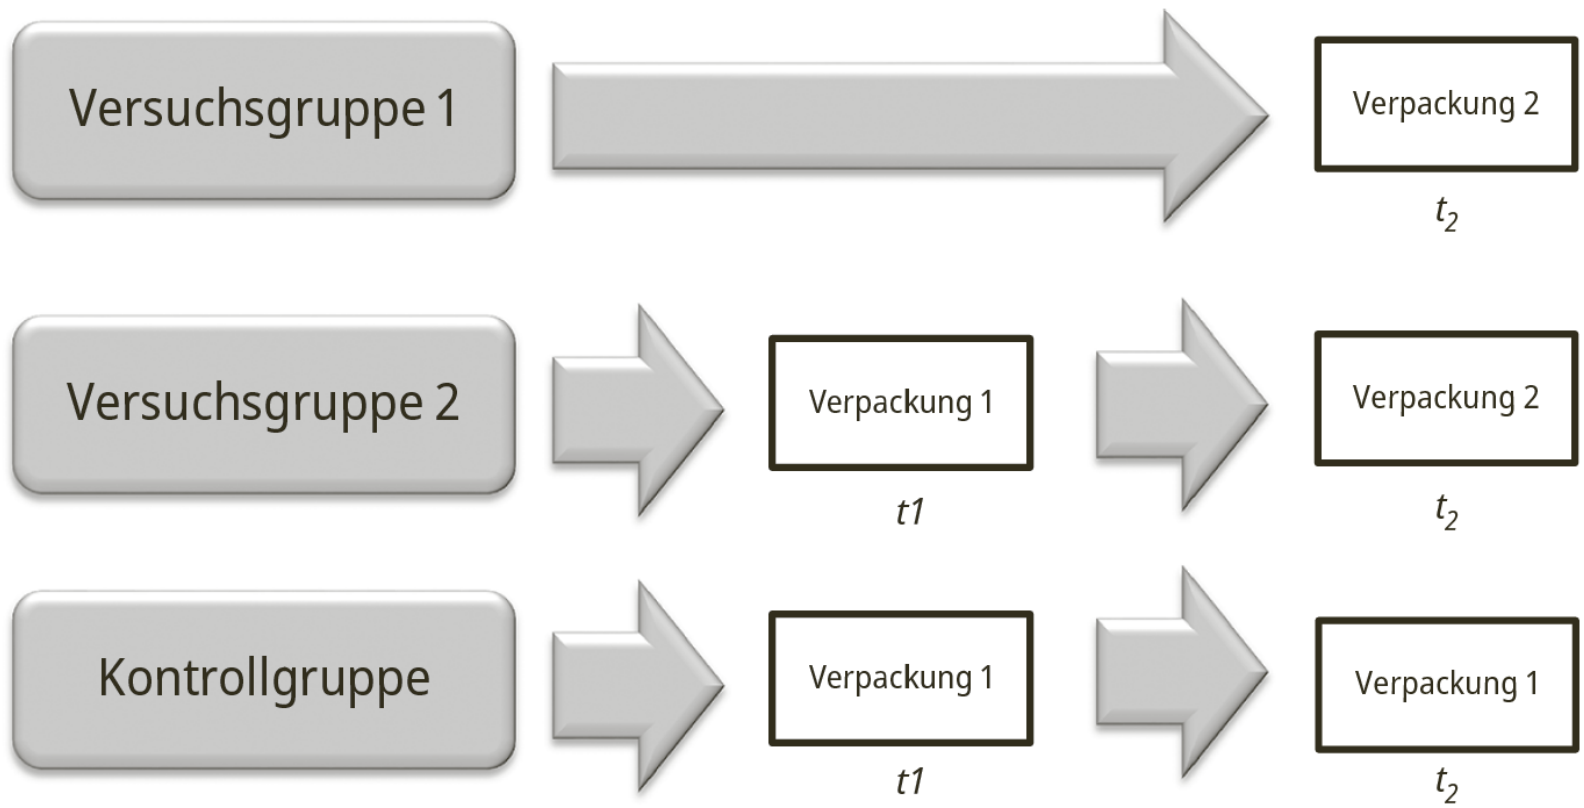

**Abb. 29:** Aufbau eines simultanen Sukzessivexperiments am Beispiel eines A/B-Tests (Quelle: Eigene Abbildung).



Buch S. 103

## Faktorielles Experimentdesign auf Matched Sample Basis

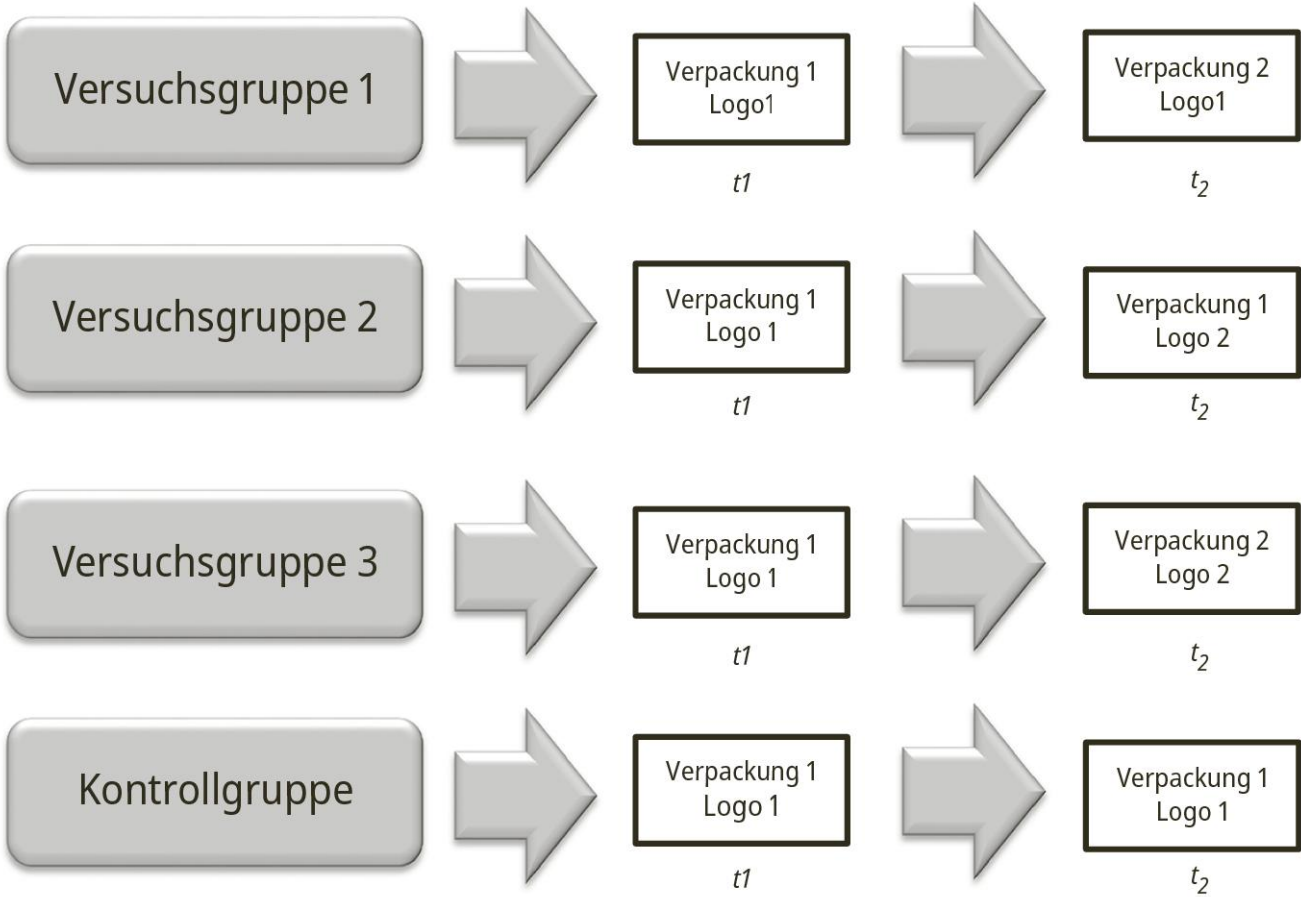

**Abb. 30:** Aufbau eines faktoriellen Experimentdesigns bei zwei unabhängigen Variablen (Quelle: Eigene Abbildung).

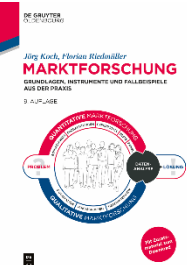

Buch S. 105

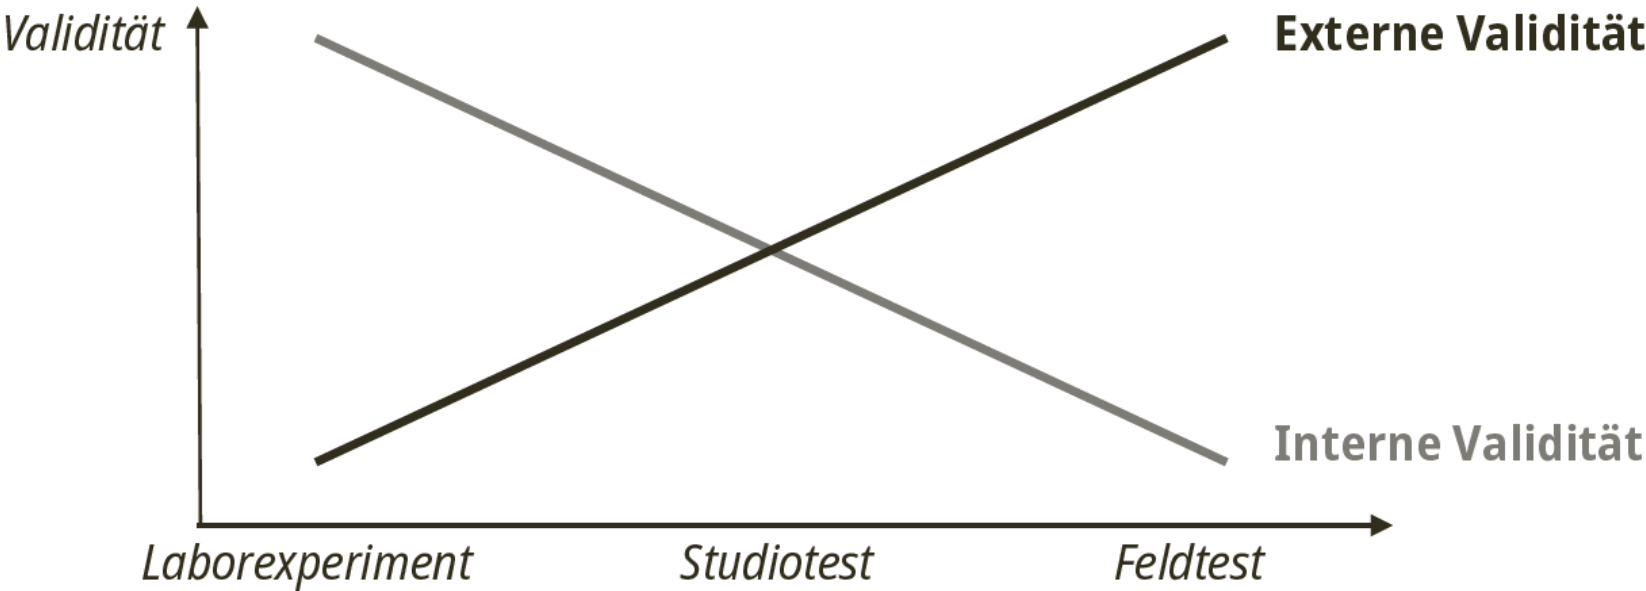

**Abb. 31:** Interne und externe Validität von Experimenten (Quelle: Kreis/Wildner/Kuß 2024, S. 217).



Buch S. 106

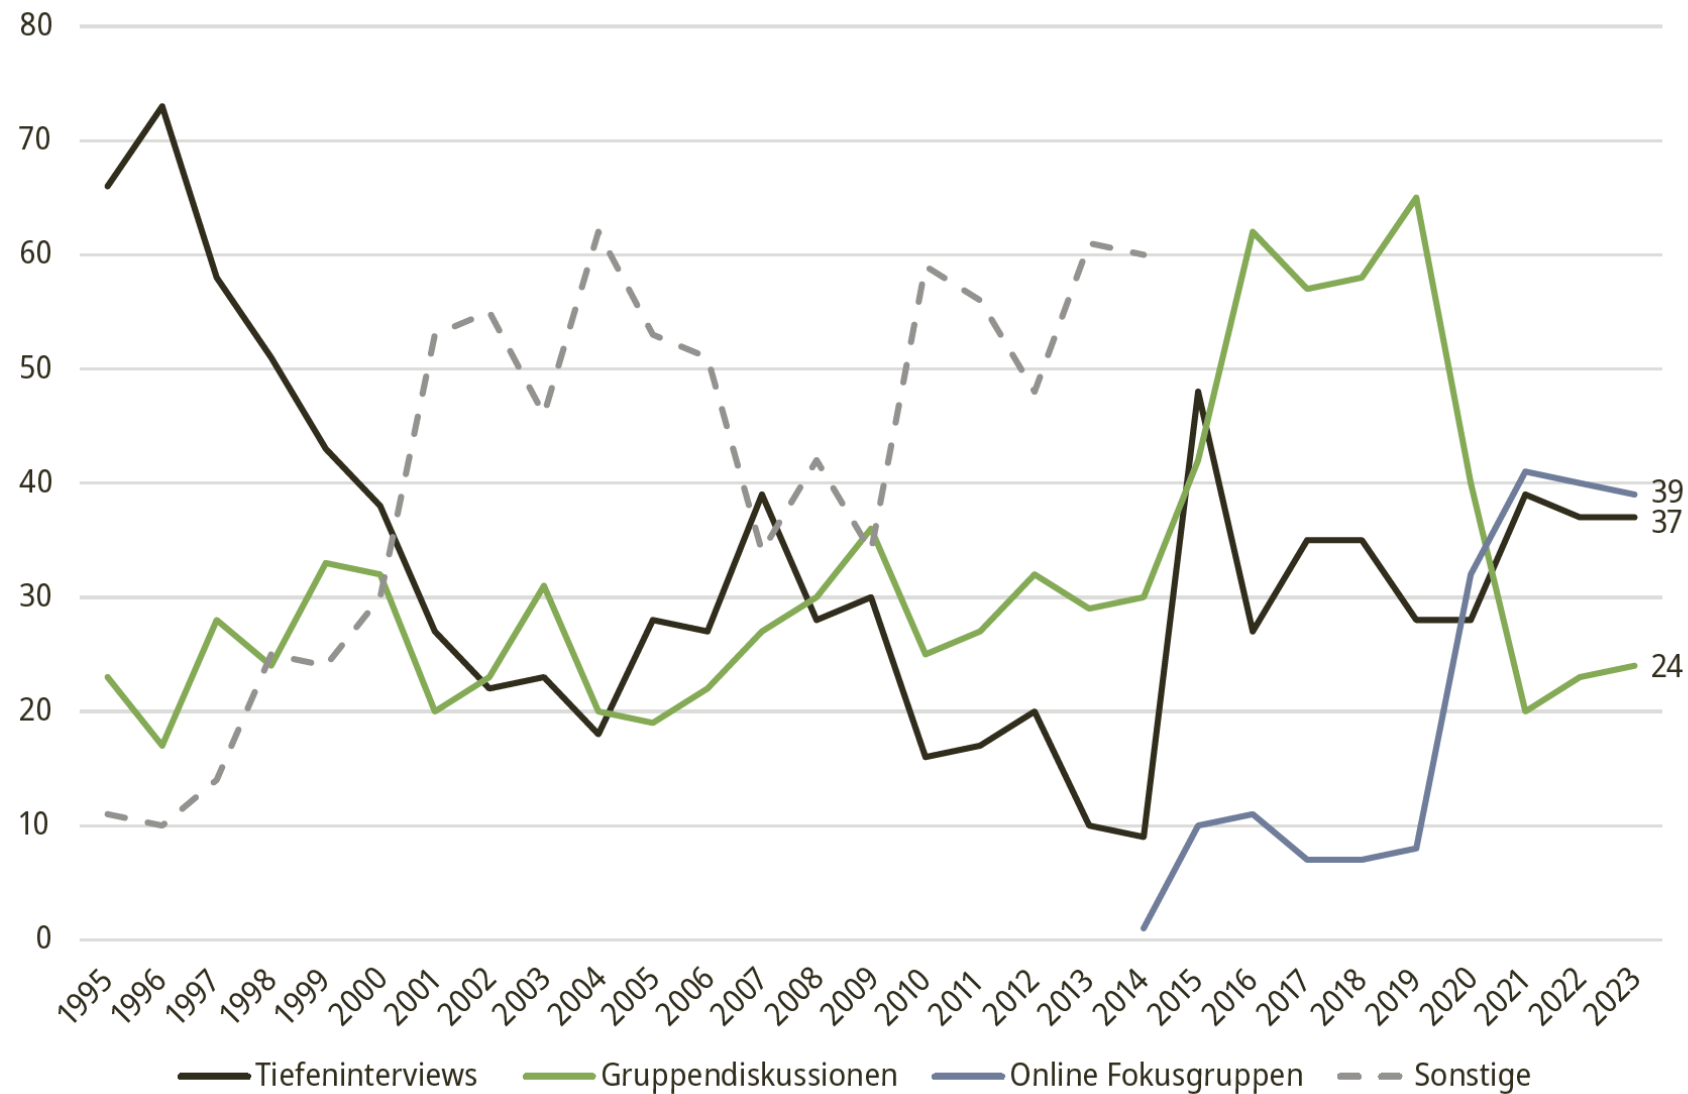

**Abb. 32:** Entwicklung unterschiedlicher explorativer Untersuchungsformen in % (Quelle: ADM 2024a).



**Tab. 33:** Vor- und Nachteile von Tiefeninterviews (Quelle: Eigene Abbildung).

| Kriterium    | Vorteile                                                                                                                                      | Nachteile                                                                                                                         |
|--------------|-----------------------------------------------------------------------------------------------------------------------------------------------|-----------------------------------------------------------------------------------------------------------------------------------|
| Rekrutierung |                                                                                                                                               | <ul style="list-style-type: none"><li>– Identifikation und Ansprache von Teilnehmern mit speziellem Profil</li></ul>              |
| Aufzeichnung | <ul style="list-style-type: none"><li>– Uneingeschränkte Antwortmöglichkeiten der Befragten</li><li>– Erfassung spontaner Eindrücke</li></ul> | <ul style="list-style-type: none"><li>– Hoher Interviewereinfluss während der Gesprächsführung</li></ul>                          |
| Auswertung   | <ul style="list-style-type: none"><li>– Unterstützung der Präsentation durch Audiostatements</li></ul>                                        | <ul style="list-style-type: none"><li>– Komplexe Kategorisierung der Ergebnisse</li><li>– Interpretation der Ergebnisse</li></ul> |
| Kosten       |                                                                                                                                               | <ul style="list-style-type: none"><li>– Zeitaufwand für Interviewer/Befragte führt zu hohen Kosten</li></ul>                      |



**Tab. 34:** Vor- und Nachteile von Gruppendiskussionen (Quelle: Eigene Abbildung).

| Kriterium    | Vorteile                                                                                                                                                    | Nachteile                                                                                                                                    |
|--------------|-------------------------------------------------------------------------------------------------------------------------------------------------------------|----------------------------------------------------------------------------------------------------------------------------------------------|
| Rekrutierung | <ul style="list-style-type: none"><li>– Einfache Ansprache der Teilnehmer durch entspanntes Format</li></ul>                                                |                                                                                                                                              |
| Aufzeichnung | <ul style="list-style-type: none"><li>– Natürliche Gesprächssituation führt zu authentischen Aussagen</li><li>– Live-Teilnahme hinter Spiegelwand</li></ul> | <ul style="list-style-type: none"><li>– Weniger Information pro teilnehmenden Probanden</li><li>– Risiko dominanter Einzelpersonen</li></ul> |
| Auswertung   | <ul style="list-style-type: none"><li>– Authentische Präsentation der Ergebnisse durch Video- oder Audiostatements</li></ul>                                | <ul style="list-style-type: none"><li>– Aufwendige Auswertung der Ergebnisse, insbesondere nonverbaler Signale</li></ul>                     |
| Kosten       | <ul style="list-style-type: none"><li>– Geringe Kosten pro teilnehmenden Probanden</li></ul>                                                                |                                                                                                                                              |



**Tab. 35:** Vor- und Nachteile von Online-Fokusgruppen (Quelle: Eigene Abbildung).

| Kriterium    | Vorteile                                                                                                                                      | Nachteile                                                                                                                                            |
|--------------|-----------------------------------------------------------------------------------------------------------------------------------------------|------------------------------------------------------------------------------------------------------------------------------------------------------|
| Rekrutierung | <ul style="list-style-type: none"><li>– Einfache Online-Rekrutierung der Teilnehmer (ggf. Zugriff auf Befragungs-Communities)</li></ul>       | <ul style="list-style-type: none"><li>– Risiko der gezielten Teilnahme von Wettbewerbern</li></ul>                                                   |
| Aufzeichnung | <ul style="list-style-type: none"><li>– Digitale Aufzeichnung</li><li>– Geringe Effekte durch Meinungsführer im digitalen Austausch</li></ul> | <ul style="list-style-type: none"><li>– Geringe Emotionalität durch fehlenden Live-Kontakt</li></ul>                                                 |
| Auswertung   | <ul style="list-style-type: none"><li>– Authentische Präsentation der Ergebnisse durch Aufzeichnung der digitalen Interaktionen</li></ul>     | <ul style="list-style-type: none"><li>– Interaktion zwischen den Teilnehmern zum Teil nicht nachvollziehbar (Aufmerksamkeit bei Beiträgen)</li></ul> |
| Kosten       | <ul style="list-style-type: none"><li>– Geringe Kosten pro teilnehmenden Probanden</li></ul>                                                  |                                                                                                                                                      |



Buch S. 113

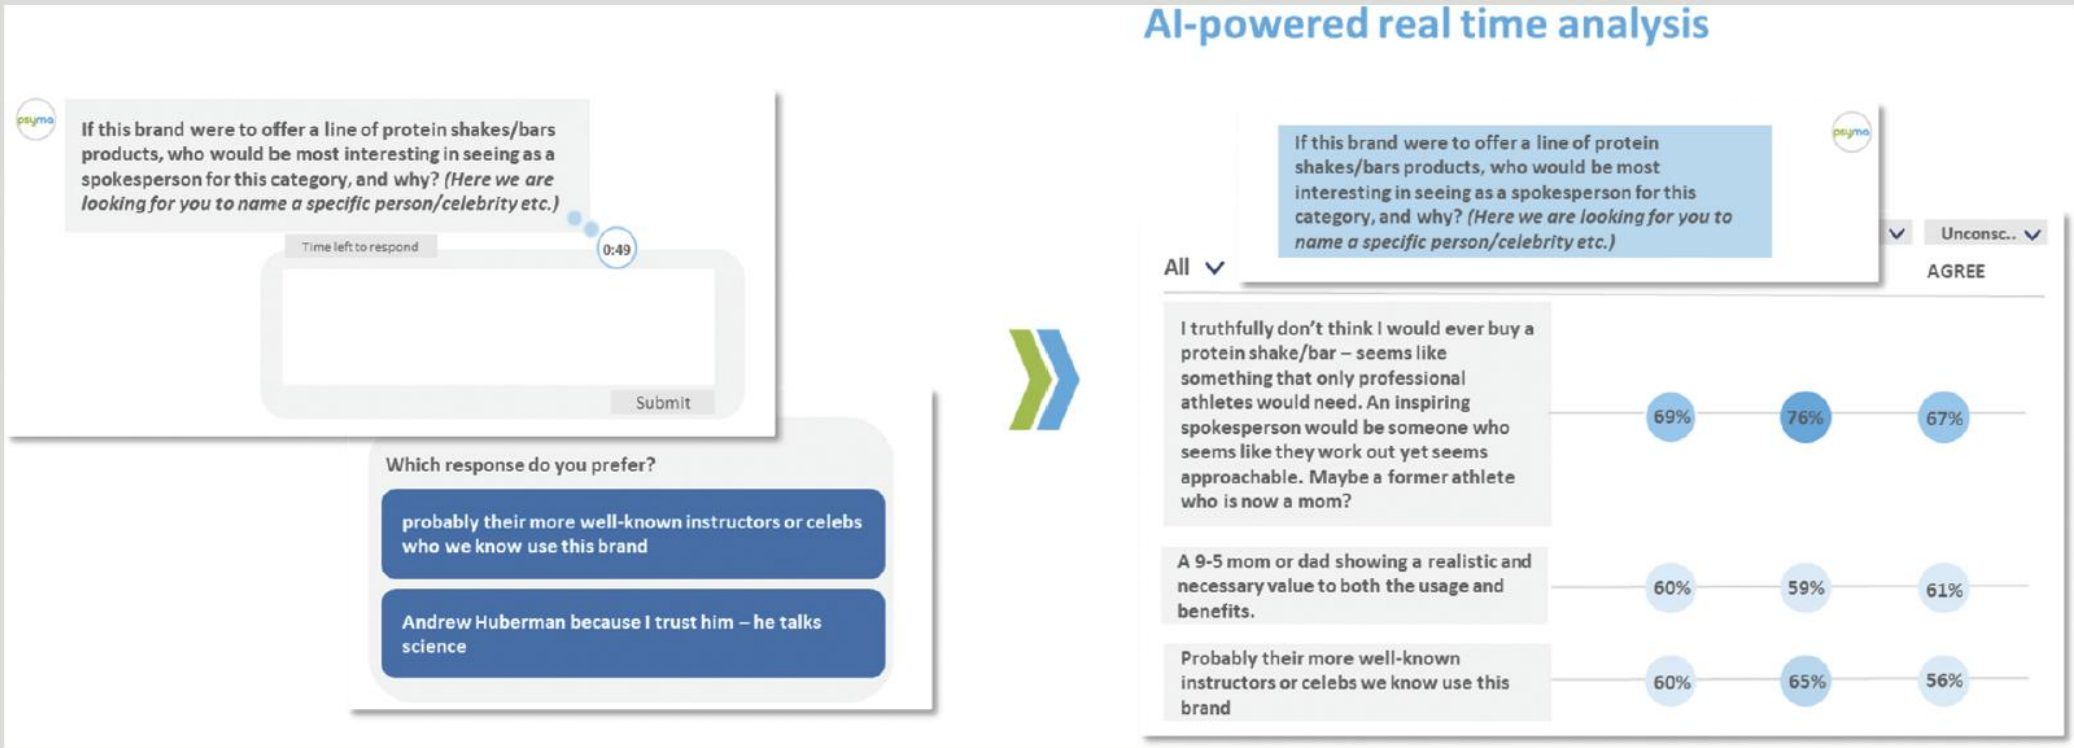

**Abb. 33:** Fiktives Beispiel zur KI-Umwandlung von offenen Texteingaben in kategorisierte Antworten mit Abfrage der abgeleiteten Zustimmungsscores.





Buch S. 116

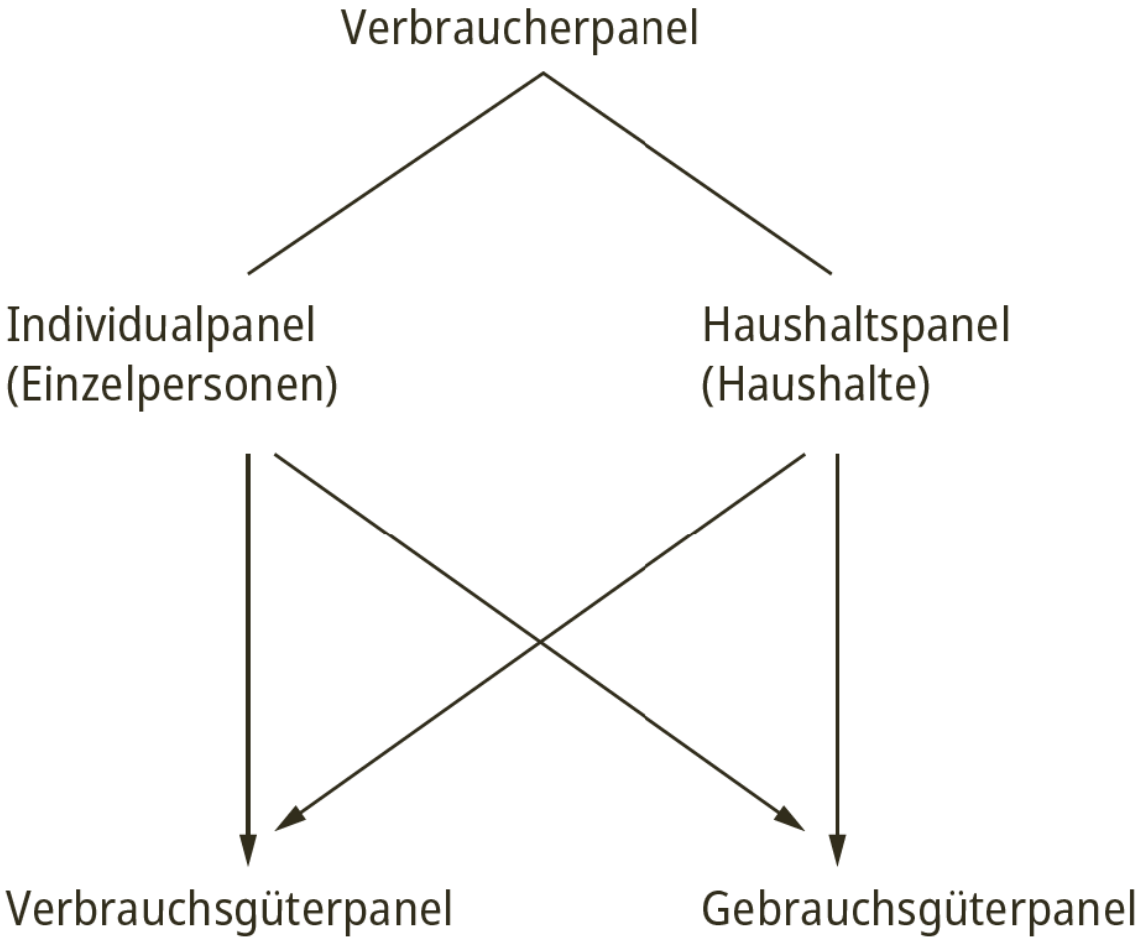

**Abb. 34:** Formen des Verbraucherpanels (Quelle: Eigene Abbildung).

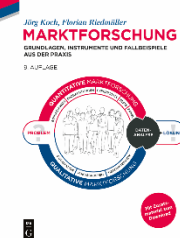

Buch S. 120

Abb. 35: Früher eingesetzter Einkaufsbericht zur Erfassung von Einkaufsverhalten (Quelle: GfK Nürnberg).

| Einzutragende Warengruppen                                                                   |                                                                                                                                                                                                | Datum des Einkaufs | Marke und Hersteller                                                             | Art des Produkts                                                   | Packungsangaben                |                                                                                    | Preis in €                                          |                           | In welchem Geschäft wurde gekauft? |                                      | Wo entnommen? |                                                                                                                                      |
|----------------------------------------------------------------------------------------------|------------------------------------------------------------------------------------------------------------------------------------------------------------------------------------------------|--------------------|----------------------------------------------------------------------------------|--------------------------------------------------------------------|--------------------------------|------------------------------------------------------------------------------------|-----------------------------------------------------|---------------------------|------------------------------------|--------------------------------------|---------------|--------------------------------------------------------------------------------------------------------------------------------------|
|                                                                                              |                                                                                                                                                                                                |                    | Entnehmen Sie bitte die Angaben dem Etikett                                      |                                                                    | Anzahl der gekauften Einheiten | Angabe ob z.B. Packungen, Stücke, Dosen usw.                                       | Gewicht je Packung in Gramm, Liter, ml, ccm angeben | Preis pro Packungseinheit | Gesamtpreis in €                   | Bei welcher Firma, Filiale, usw.     | Geschäftswert | 1 = Regal Normalpreis<br>2 = Regal Sonderpreis<br>3 = woanders Normalpreis<br>4 = woanders Sonderpreis<br>▼ (Bitte Ziffer eintragen) |
|  <b>Eis</b> | Eis für den Haushalt abgepackt                                                                                                                                                                 |                    | Marke und Zusatzbezeichnung angeben                                              | Produktbeschreibung/ Geschmacksrichtung                            |                                |                                                                                    | ml                                                  |                           |                                    | Wenn Heimdienst, bitte Namen angeben |               |                                                                                                                                      |
| <b>Geflügel</b>                                                                              | Geflügel tiefgefroren/frisch<br>Geflügelgerichte z.B. mit Soße unter Tiefkühlkost eintragen                                                                                                    |                    | Markenname <input type="checkbox"/> frisch <input type="checkbox"/> tiefgefroren | z.B. Hähnchen, Poularden, Puten<br>z.B. Hähnchen, Poularden, Puten |                                | Ganzes Geflügel oder weiche Teile                                                  |                                                     |                           |                                    | Wenn Heimdienst, bitte Namen angeben |               |                                                                                                                                      |
| <b>Tiefkühlkost</b>                                                                          | <b>Gemüse</b> z.B. Spinat, Erbsen, Gemüsepfannen, Kräuter<br>hier nur tiefgefrorene Produkte eintragen                                                                                         |                    | Marke, Hersteller                                                                | Gemüsesorte<br>Gemüsesorte                                         |                                |                                                                                    |                                                     |                           |                                    | Wenn Heimdienst, bitte Namen angeben |               |                                                                                                                                      |
|                                                                                              | nur tiefgefroren                                                                                                                                                                               |                    |                                                                                  |                                                                    |                                |                                                                                    |                                                     |                           |                                    |                                      |               |                                                                                                                                      |
|                                                                                              | <b>Kartoffelprodukte</b><br>z.B. Pommes frites, Knödel, Kloßteig, Kroketten                                                                                                                    |                    |                                                                                  | Art des Produktes                                                  |                                |                                                                                    |                                                     |                           |                                    |                                      |               |                                                                                                                                      |
|                                                                                              | <b>Fisch</b> z.B. Fischstäbchen, Schlemmerfilet, Filets                                                                                                                                        |                    |                                                                                  | Art des Produktes                                                  |                                | Alu Schale <input type="checkbox"/> And. Verp. <input type="checkbox"/>            |                                                     |                           |                                    |                                      |               |                                                                                                                                      |
|                                                                                              | tiefgefroren                                                                                                                                                                                   |                    |                                                                                  |                                                                    |                                | <input type="checkbox"/>                                                           |                                                     |                           |                                    |                                      |               |                                                                                                                                      |
|                                                                                              | <b>Backwaren</b> z.B. Kuchen, Torten, Strudel, Teige, Gebäck<br>nur tiefgefrorene Produkte                                                                                                     |                    |                                                                                  | Art des Produktes                                                  |                                | z. Auftauen <input type="checkbox"/> Aufbacken <input type="checkbox"/>            |                                                     |                           |                                    |                                      |               |                                                                                                                                      |
|                                                                                              | tiefgefroren                                                                                                                                                                                   |                    |                                                                                  |                                                                    |                                | <input type="checkbox"/>                                                           |                                                     |                           |                                    |                                      |               |                                                                                                                                      |
|                                                                                              | <b>Pizza/Baguette</b>                                                                                                                                                                          |                    |                                                                                  | Genaue Produktbezeichnung                                          |                                | Einzel <input type="checkbox"/> Mehrfachpack <input type="checkbox"/>              |                                                     |                           |                                    |                                      |               |                                                                                                                                      |
|                                                                                              | tiefgefroren                                                                                                                                                                                   |                    |                                                                                  |                                                                    |                                | <input type="checkbox"/>                                                           |                                                     |                           |                                    |                                      |               |                                                                                                                                      |
|                                                                                              | <b>Komplettgerichte, Teilfertig-gerichte, Fleischprodukte</b><br>z.B. Hühnerfricassee im Kochbeutel, Fleisch-/Fischgerichte mit allen Beilagen, Hackfleischprodukte                            |                    |                                                                                  | Genaue Produktbezeichnung                                          |                                | Alu-/Kunststoffschale <input type="checkbox"/> Kochbeutel <input type="checkbox"/> |                                                     |                           |                                    |                                      |               |                                                                                                                                      |
|                                                                                              | tiefgefroren                                                                                                                                                                                   |                    |                                                                                  |                                                                    |                                | <input type="checkbox"/>                                                           |                                                     |                           |                                    |                                      |               |                                                                                                                                      |
|                                                                                              | <b>Sonstige Tiefkühlkost</b><br>z.B. Obst, Säfte, Suppen, Milchprodukte, Frühlingsrollen                                                                                                       |                    |                                                                                  | Genaue Produktbezeichnung                                          |                                |                                                                                    |                                                     |                           |                                    |                                      |               |                                                                                                                                      |
|                                                                                              | <b>Kartoffelfertigprodukte</b>                                                                                                                                                                 |                    |                                                                                  |                                                                    |                                |                                                                                    | Gramm, Portionen, Stück                             |                           |                                    |                                      |               |                                                                                                                                      |
|                                                                                              | <b>Püree</b> Kartoffelpüree, Erbsenpüree                                                                                                                                                       |                    |                                                                                  |                                                                    |                                |                                                                                    |                                                     |                           |                                    |                                      |               |                                                                                                                                      |
|                                                                                              | <b>Knödel/ Klöße</b> Kartoffelknödel/-Klöße (Rohe, Gekochte, Halb+Halb, usw.)<br>Kloßteig<br>Semmelknödel, Sonstige Knödel (Speckknödel, Vollkorn-Knödel, Quarkknödel, Böhmisches Knödel usw.) |                    |                                                                                  | z.B. rohe Klöße, Semmelknödel                                      |                                | Kochbeutel <input type="checkbox"/> lose <input type="checkbox"/>                  |                                                     |                           |                                    |                                      |               |                                                                                                                                      |
|                                                                                              |                                                                                                                                                                                                |                    |                                                                                  |                                                                    |                                | <input type="checkbox"/>                                                           |                                                     |                           |                                    |                                      |               |                                                                                                                                      |
|                                                                                              |                                                                                                                                                                                                |                    |                                                                                  |                                                                    |                                | <input type="checkbox"/>                                                           |                                                     |                           |                                    |                                      |               |                                                                                                                                      |
|                                                                                              | <b>Kartoffelpuffer</b> (Reibekuchen)                                                                                                                                                           |                    |                                                                                  |                                                                    |                                |                                                                                    |                                                     |                           |                                    |                                      |               |                                                                                                                                      |
|                                                                                              | <b>Kroketten</b> (Kartoffelplätzchen/-medaillons)                                                                                                                                              |                    |                                                                                  |                                                                    |                                |                                                                                    |                                                     |                           |                                    |                                      |               |                                                                                                                                      |
|                                                                                              | <b>Rösti, Bratkartoffeln, Röstkartoffeln</b>                                                                                                                                                   |                    |                                                                                  | Sorte und Geschmacksrichtung                                       |                                | Dose <input type="checkbox"/> Alubeutel (in Schachtel) <input type="checkbox"/>    |                                                     |                           |                                    |                                      |               |                                                                                                                                      |
|                                                                                              | <b>Sonstige Kartoffelfertigprodukte</b><br>z.B. Kartoffelsalat, pfannenfertige Kartoffelgerichte                                                                                               |                    |                                                                                  | Sorte und Geschmacksrichtung                                       |                                | <input type="checkbox"/>                                                           |                                                     |                           |                                    |                                      |               |                                                                                                                                      |

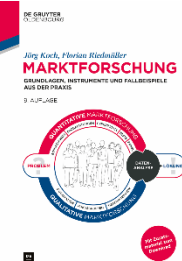

Buch S. 121

**Tab. 36:** Standard Fakts des Verbraucherpanels (Quelle: Eigene Abbildung).

|                           |   |                                           |
|---------------------------|---|-------------------------------------------|
| – <b>wie viele</b>        | → | Käufer (Käuferreichweite/Penetration)     |
| – <b>was</b>              | → | Marken/Produkte/Artikel                   |
| – <b>wie viel</b>         | → | Einkaufsmengen (Menge/Wert absolut und %) |
| – <b>zu welchem Preis</b> | → | Preise (eff. Preise/Ø-Preise)             |
| – <b>wie oft</b>          | → | Einkaufsintensitäten (Mengen pro Käufer)  |
| – <b>wo</b>               | → | Einkaufsstätten                           |
| – <b>wann</b>             | → | Einkaufszeiten/-rhythmen                  |



Buch S. 122

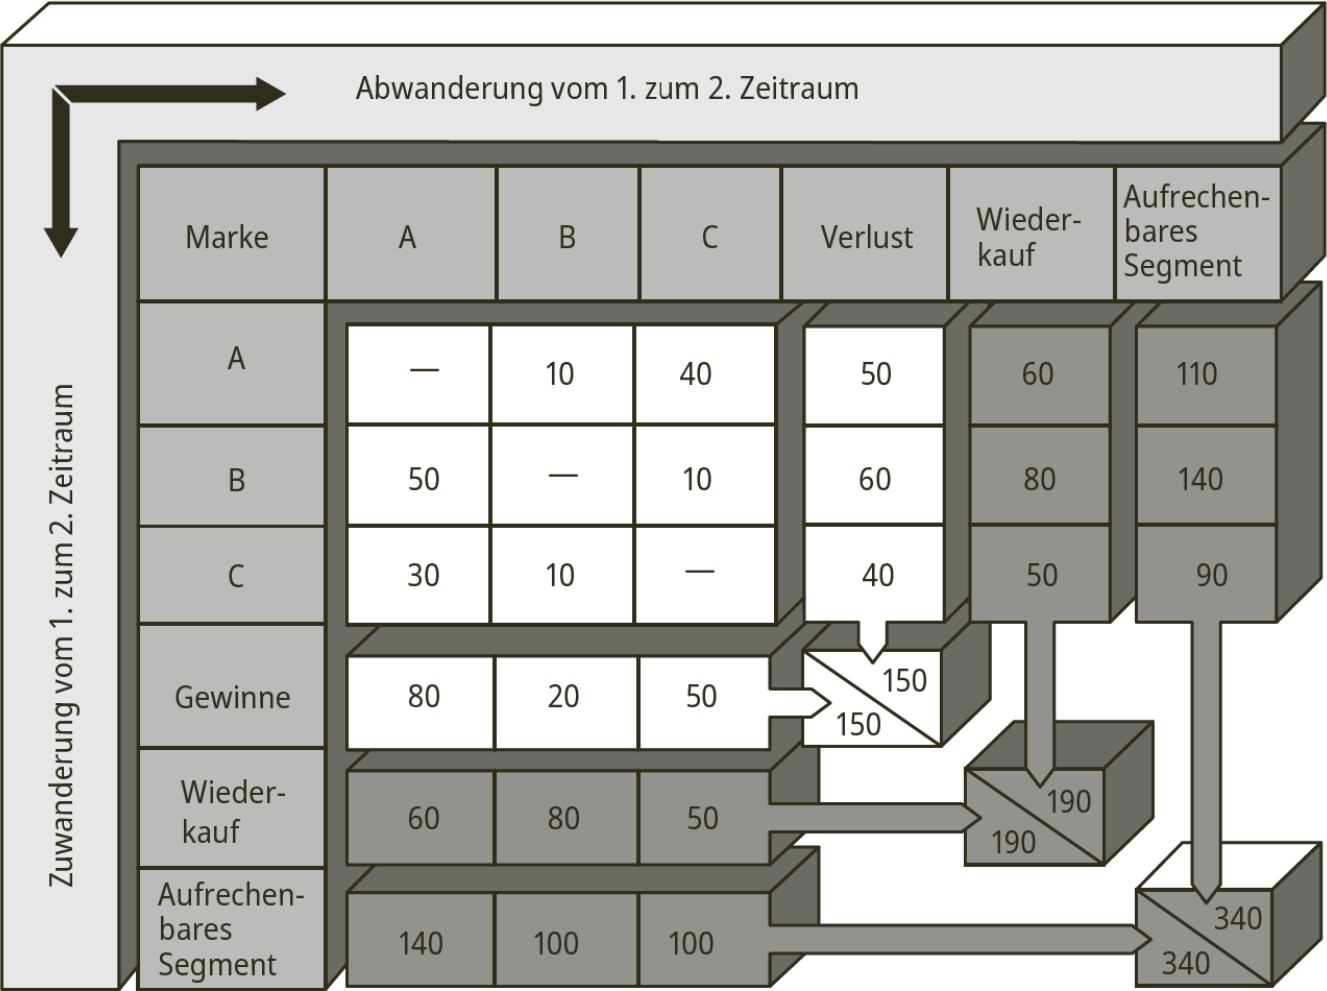

Abb. 36: Beispiel für eine Gain and loss-Innenmatrix.



Buch S. 124

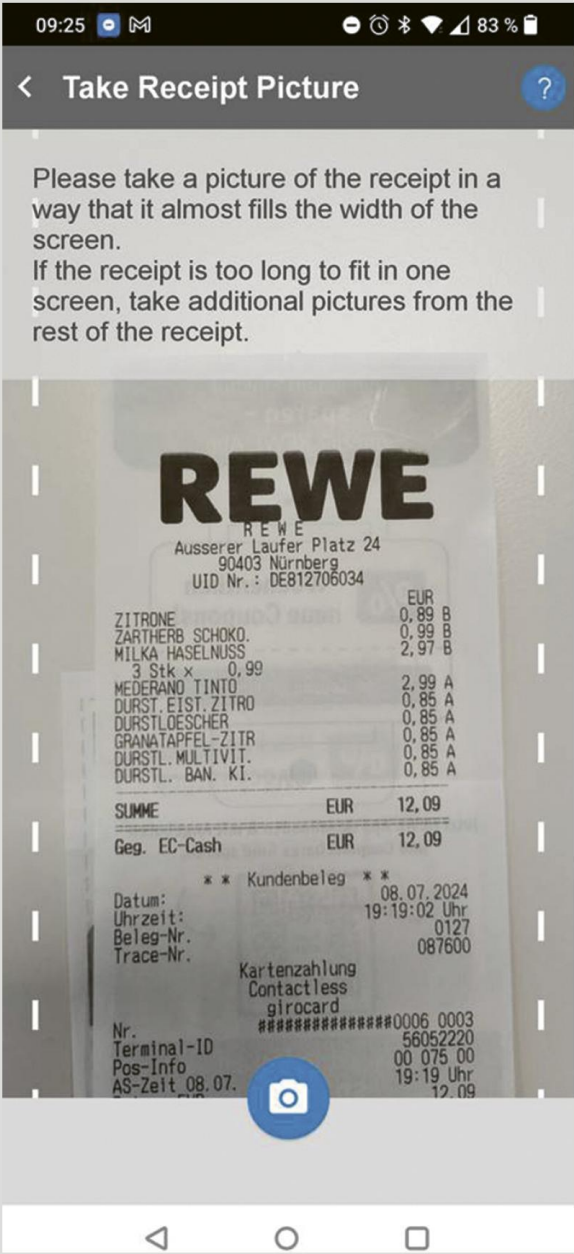

**Abb. 37:** Erfassung von FMCG-Einkaufsakten (Bons) mit Hilfe von Bildeingabe via YouGov Smartphone-App.



Buch S. 125

**Tab. 37:** Gebrauchsgüter-Panel im Großhandel (GH), Einzelhandel (EH) und Fachhandel (FH)  
(Quelle: Eigene Abbildung).

|                             |                            |                             |
|-----------------------------|----------------------------|-----------------------------|
| Augenoptiker                | Elektro-FH/GH              | Küchenspezialisten/-studios |
| Bau- und Heimwerkermärkte   | Fotofach-EH/Foto-Drogerien | Lebensmittelhandel          |
| Büroausstattung.-/-möbel-FH | Gartencenter               | Sanitätsfach-EH             |
| Cash & Carry                | Gastronomie                | Telekom-FH                  |
| Computershops/Systemhändler | Glas/Porzellan/Keramik-FH  | Verbrauchermärkte           |



Buch S. 126

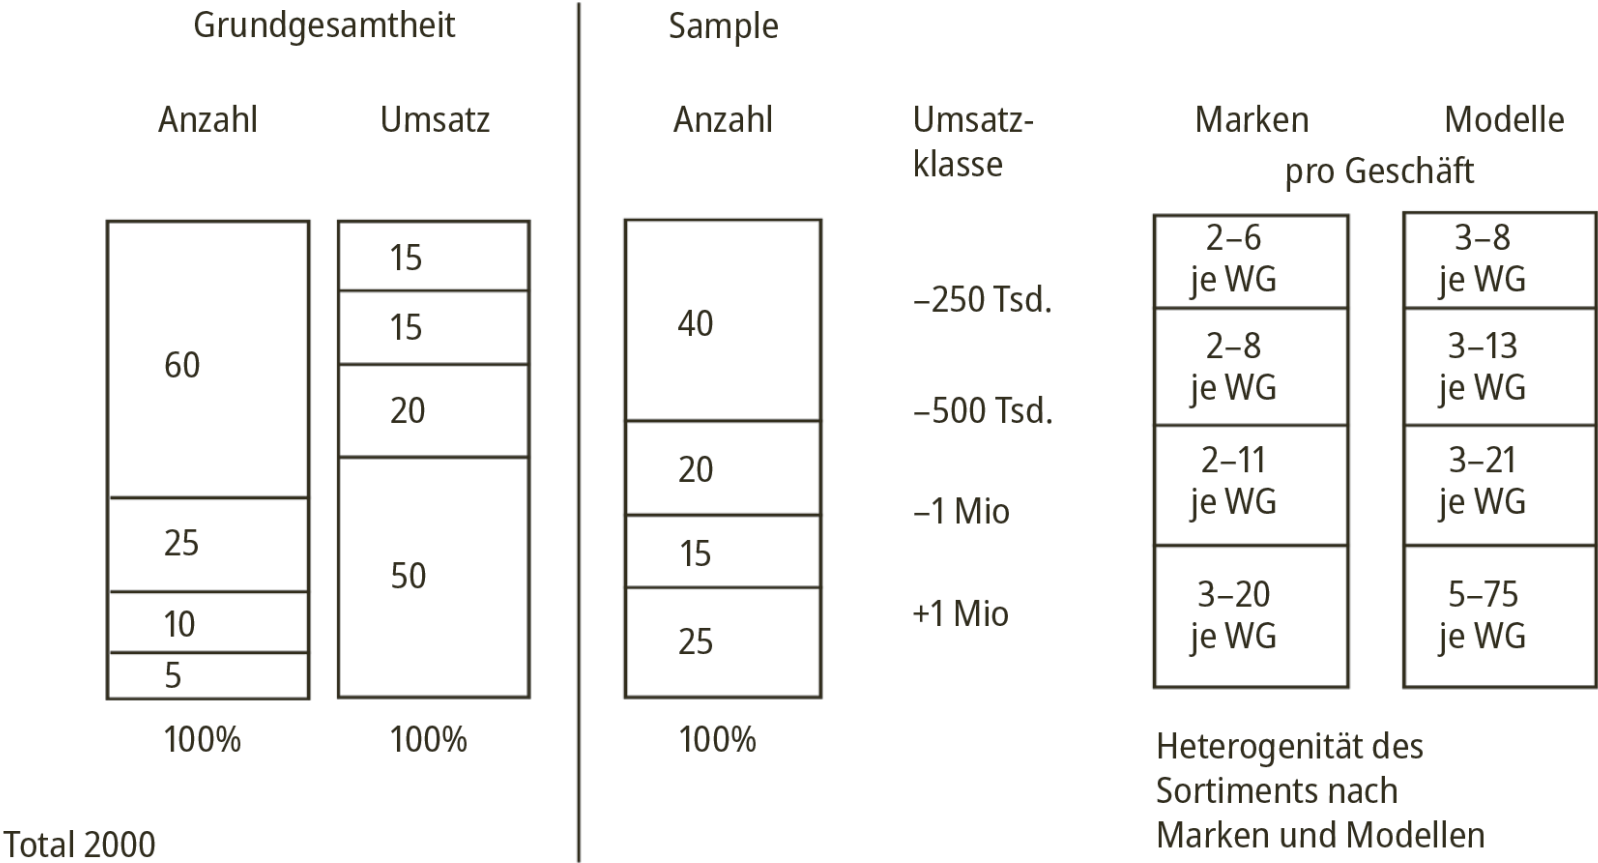

→ Disproportionaler Stichprobenaufbau unter Berücksichtigung der Anzahl der Geschäfte der einzelnen zellen und deren Umsatzbedingung

**Abb. 38:** Disproportionaler Stichprobenaufbau bei einem Handelspanel (Quelle: GfK Nürnberg).





Buch S. 127

ERMITTLUNG DER  
HOCHRECHNUNGSFAKTOREN

|           | Grundgesamtheit |     |       |     |     | Stichprobe |     |       |     |     | Hochrechnungsfaktor |     |       |     |     |
|-----------|-----------------|-----|-------|-----|-----|------------|-----|-------|-----|-----|---------------------|-----|-------|-----|-----|
|           | Gebiet          |     |       |     |     | Gebiet     |     |       |     |     | Gebiet              |     |       |     |     |
|           | Nord            | NRW | Mitte | BWB | Bay | Nord       | NRW | Mitte | BWB | Bay | Nord                | NRW | Mitte | BWB | Bay |
| 1 Mio.    |                 |     |       | 915 |     |            |     |       | 14  |     |                     |     |       | 65  |     |
| 1–2 Mio.  |                 |     |       |     |     |            |     |       |     |     |                     |     |       |     |     |
| 2–5 Mio.  |                 |     |       |     |     |            |     |       |     |     |                     |     |       |     |     |
| 5–10 Mio. |                 | 310 |       |     |     |            | 16  |       |     |     |                     | 19  |       |     |     |
| +10 Mio.  |                 |     |       |     |     |            |     |       |     |     |                     |     |       |     |     |

Umsatz-  
klasse

Zelle von geringer Umsatzbedeutung:  
geringerer Stichprobenumfang

➔ höherer Hochrechnungsfaktor pro Geschäft

Zelle von hoher Umsatzbedeutung:  
größere Stichprobe sinnvoll

➔ niedriger Hochrechnungsfaktor pro Geschäft

Abb. 39: Ermittlung von Hochrechnungsfaktoren.





Buch S. 130

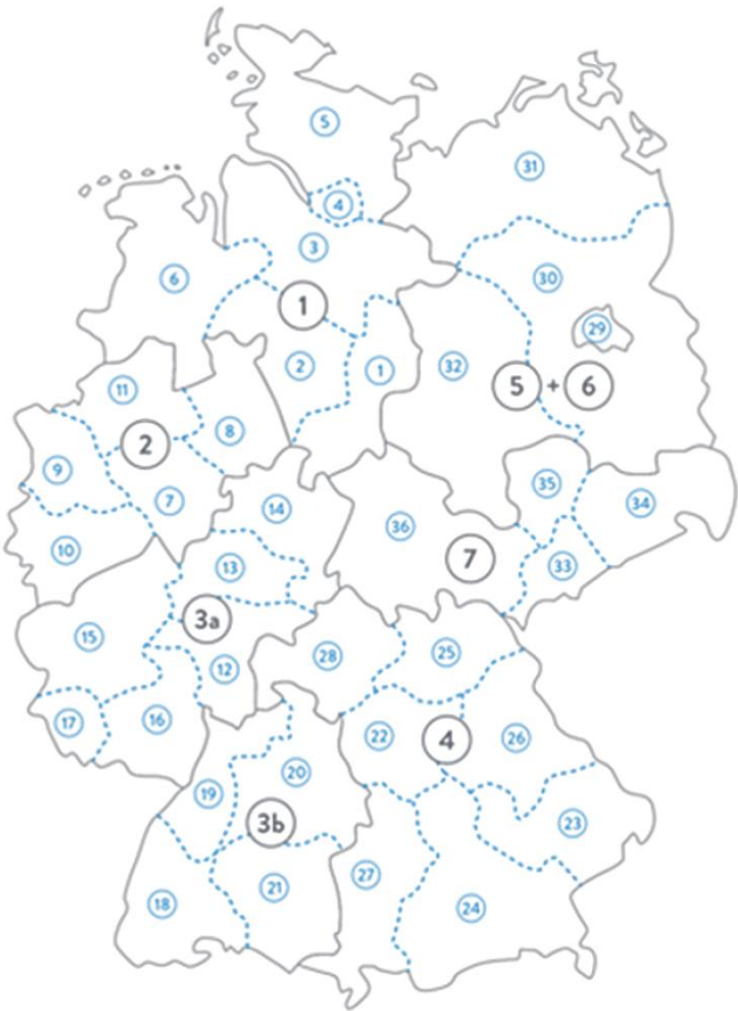

|     |                                                             |
|-----|-------------------------------------------------------------|
| 1   | HAMBURG, BREMEN, SCHLESWIG-HOLSTEIN, NIEDERSACHSEN          |
| 2   | NORDRHEIN-WESTFALEN                                         |
| 3A  | HESSEN, RHEINLAND-PFALZ, SAARLAND                           |
| 3B  | BADEN-WÜRTTEMBERG                                           |
| 4   | BAYERN                                                      |
| 5+6 | BERLIN, MECKLENBURG-VORPOMMERN, BRANDENBURG, SACHSEN-ANHALT |
| 7   | THÜRINGEN, SACHSEN                                          |

**Abb. 40:** Nielsen Micro Regionen (Quelle: <https://sites.nielsen.com/microregionen/>).



Buch S. 133

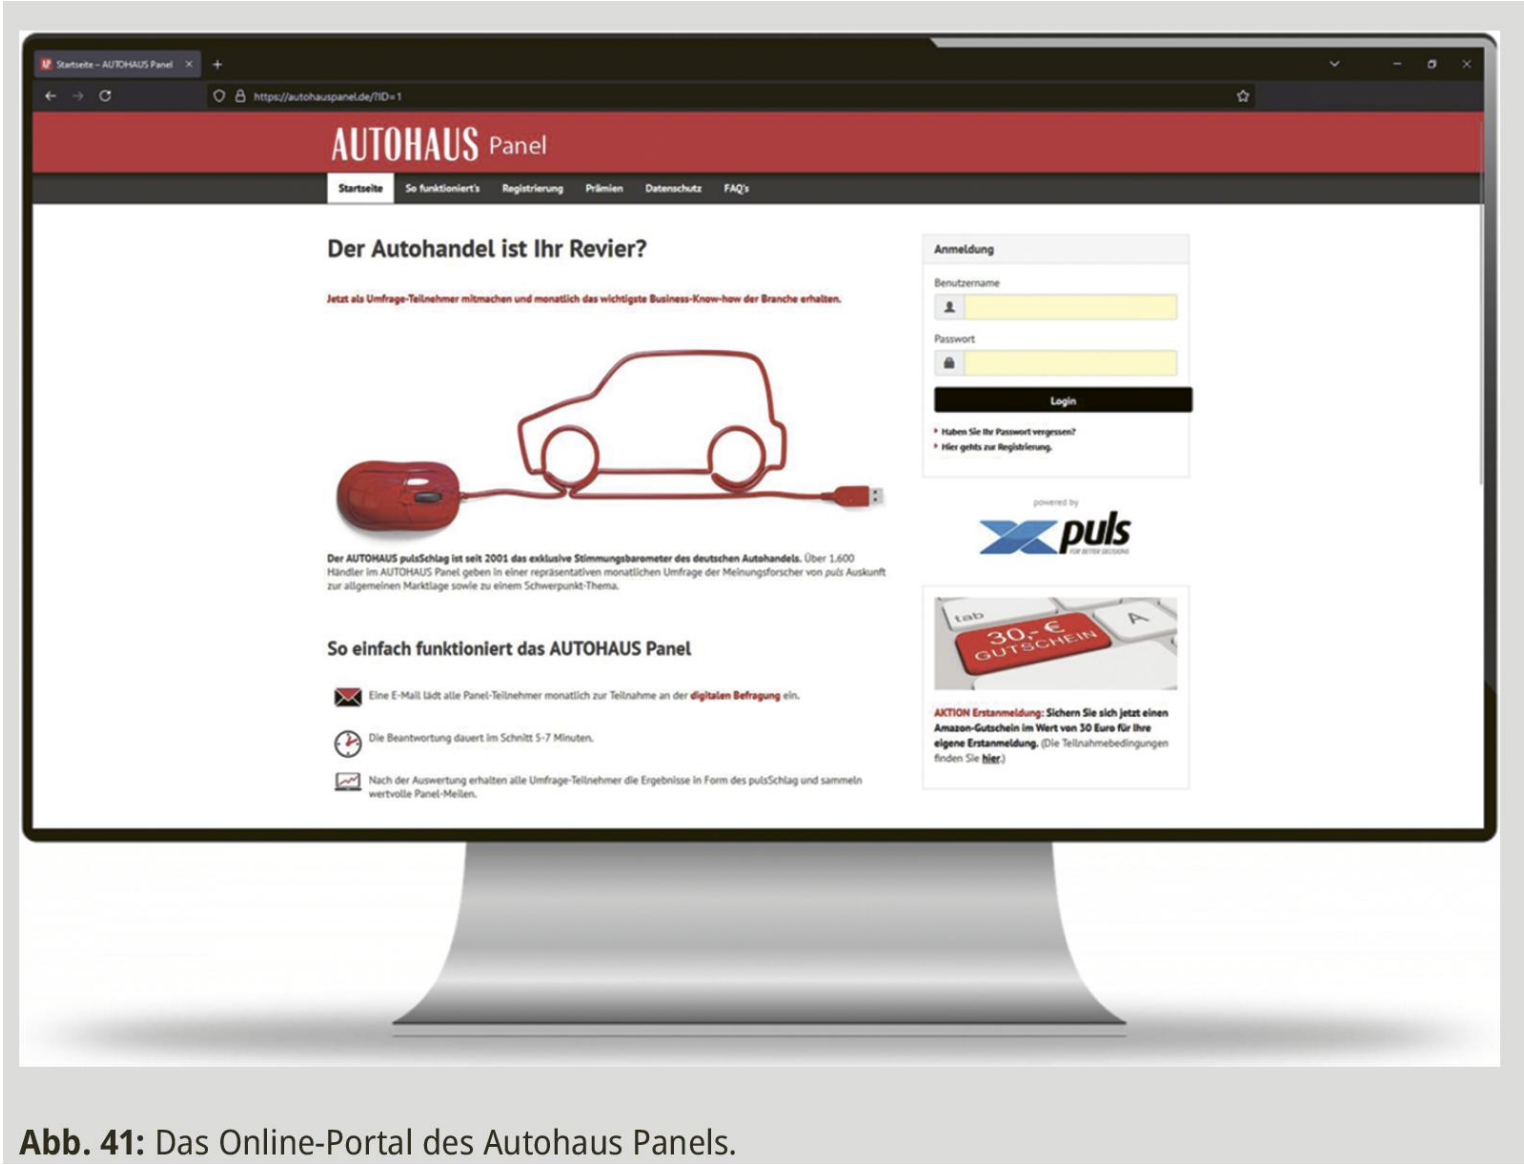

Abb. 41: Das Online-Portal des Autohaus Panels.

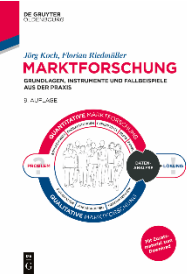

Buch S. 134

Wie wird sich das Geschäft aus Ihrer Sicht im Gw-/NW- und Service-Bereich in den nächsten 3 Monaten entwickeln?

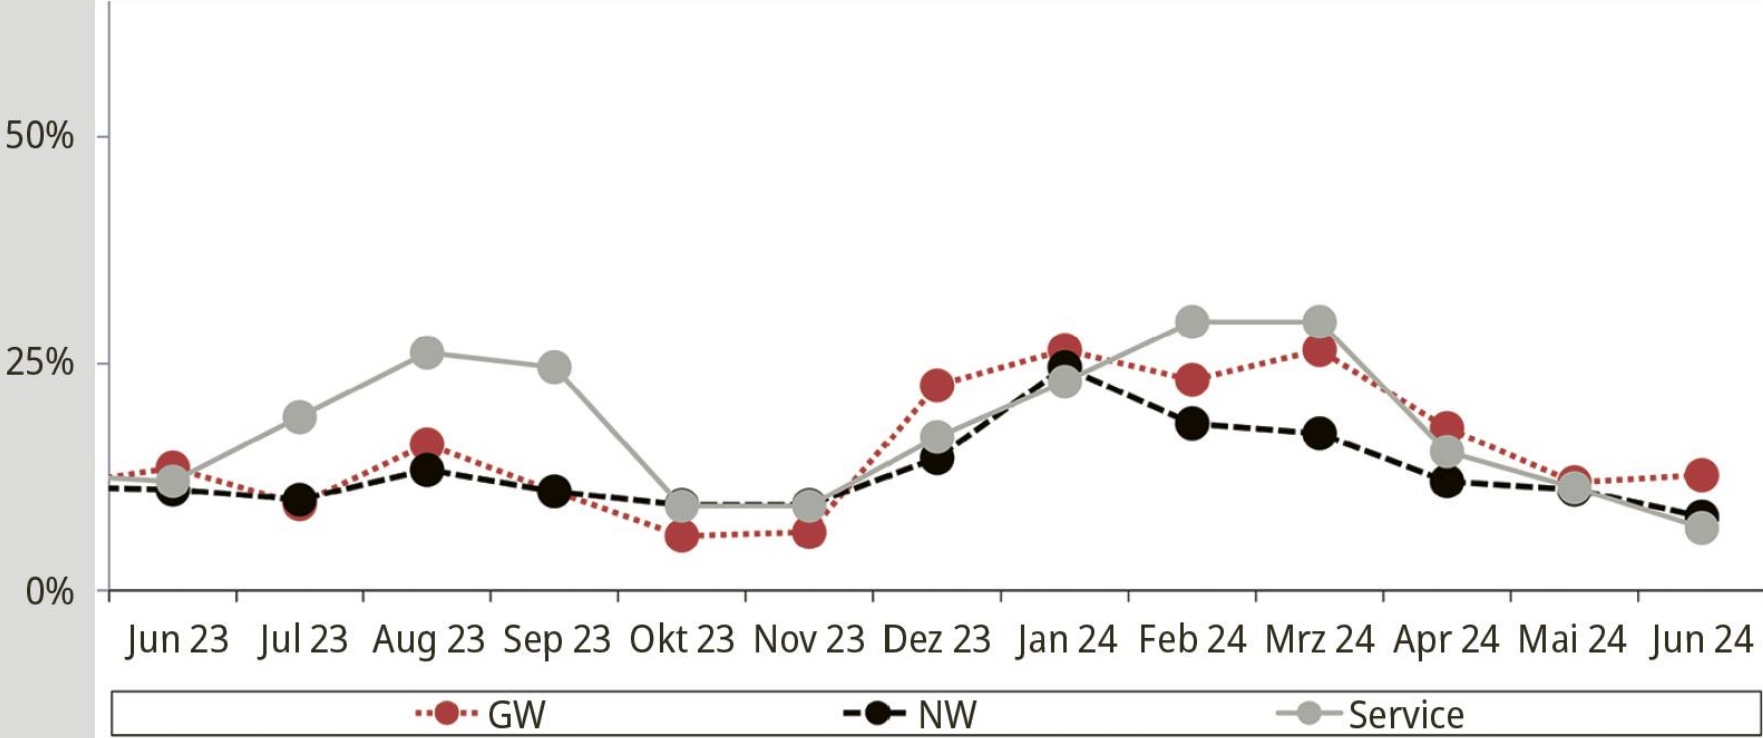

Monatsvergleich  
Antwort: "Wird besser"

Quelle: AUTOHAUS *pulsSchlag* 07/2024

**Abb. 42:** Beispielhaftes Ergebnis aus dem AUTOHAUS *pulsSchlag* 07/2024.



**Tab. 38:** Identifikation von Stakeholdern für Buying Center für B2B Marktforschungsstudien (Quelle: Webster/Wind 1972, S. 14).

|                                 |                                                                                                                                                    |
|---------------------------------|----------------------------------------------------------------------------------------------------------------------------------------------------|
| Einkäufer<br>(Buyer)            | Spezialisten, die die Lieferanten auswählen; Kaufverhandlungen führen; Preise und Konditionen aushandeln                                           |
| Beeinflusser<br>(Influencer)    | Bestimmen die einzuhaltenden Normen und Mindestanforderungen                                                                                       |
| Nutzer/Anwender<br>(User)       | sind bei Industriegütern und OEMs die Be- und Verarbeiter in der Produktion; geben für den Einkäufer Vorgaben in Bezug auf Art, Menge und Qualität |
| Türöffner<br>(Gate Keeper)      | lenken im Hintergrund auf informellen Wegen den Informationsfluss und bereiten so die endgültige Entscheidung vor                                  |
| Entscheider<br>(Decision Maker) | entscheiden letztlich über die Auftragsvergabe unter Berücksichtigung finanzieller Vorteile und Risiken; bestätigen formell den Kaufabschluss      |



Buch S. 137

**Tab. 39:** Interne und externe Quellen zur Sekundärforschung (Quelle: eigene Darstellung).

| Interne Quellen (Auswahl)           | Externe Quellen (Auswahl)                                                                            |
|-------------------------------------|------------------------------------------------------------------------------------------------------|
| Umsatz- und Absatzstatistiken       | Statistikämter des Bundes und der Länder                                                             |
| Außen- und Kundendienstberichte     | Statistiken der Branchenverbände                                                                     |
| Produktionsberichte und Lieferungen | Statistiken der Industrie und Handelskammern                                                         |
| Berichte über Reklamationen         | Veröffentlichungen der wirtschaftswissenschaftlichen Institute (wie DIW, HWWA, IWH, IfW, ifo, usw.)  |
| Berichte über F + E                 | Veröffentlichungen von Beratungsgesellschaften (wie Diebold, Prognos, A.D. Little, Forst & Sullivan) |
| Messeberichte                       | Auskünfte aus Datenbanken und Suchmaschinen<br>Berichte in Fachzeitschriften                         |



Buch S. 140

**Tab. 40:** Anforderungen an die Äquivalenz von internationalen Marktforschungsstudien (Quelle: Eigene Abbildung).

| Dimension                      | Ausprägungen                                                                                           | Beispiele                                                                                         |
|--------------------------------|--------------------------------------------------------------------------------------------------------|---------------------------------------------------------------------------------------------------|
| Untersuchungssachverhalt       | Funktionale Äquivalenz<br>Konzeptionelle Äquivalenz                                                    | Produktverwendung und Verhalten<br>Begriffe und Konzepte,<br>z. B. Lifestyles                     |
|                                | Kategoriale Äquivalenz                                                                                 | Kategorisierung von Produkten                                                                     |
| Untersuchungsmethode           | Erhebungsmethodische Äquivalenz<br>Befragungstaktische Äquivalenz<br>Übersetzungstechnische Äquivalenz | Eingesetzte Erhebungsmethoden<br>Frageformen und -formulierungen<br>Bedeutungsgleiche Übersetzung |
|                                | Messmethodische Äquivalenz                                                                             | Maßeinheiten und Skalen                                                                           |
| Untersuchungseinheiten         | Definitionsäquivalenz<br>Auswahläquivalenz                                                             | Definition der Grundgesamtheit<br>Vergleichbare Verfahren                                         |
| Untersuchungssituation         | Zeitliche Äquivalenz<br>Interaktionsäquivalenz                                                         | Erhebungszeiträume und -punkte<br>Interviewsituation                                              |
| Untersuchungsdatenaufbereitung | Übersetzungsäquivalenz<br>Responsekategorisierungen                                                    | Semantisch gleiche Fragen<br>Semantisch gleiche<br>Antwortvorgaben                                |





Buch S. 140

**Tab. 41:** Quellen für internationale Sekundärforschung im In- und Ausland (Quelle: Eigene Abbildung).

| Inländische Quellen                                                                                 | Ausländische Quellen (vor Ort)                                                        |
|-----------------------------------------------------------------------------------------------------|---------------------------------------------------------------------------------------|
| Publikationen von Ministerien und Behörden<br>(z. B. BMWI, BMZ, AA, GTAI usw.)                      | Publikationen ausländischer Ministerien, Behörden<br>und statistischer Ämter          |
| Publikationen statistischer Ämter<br>(z. B. Stat. Bundesamt: Fachserie Ausland)                     | Publikationen internationaler Organisationen<br>(Eurostat, UN, GATT, IWFI usw.)       |
| Publikationen der Bundesbank<br>(z. B. Länderberichte)                                              | Publikationen ausländischer Nationalbanken                                            |
| Publikationen der IHK's, Wirtschaftsverbände,<br>Banken, Consultingfirmen, Repräsentanzen           | Studien internationaler Consulting-Firmen<br>(z. B. Accenture, Frost & Sullivan usw.) |
| Publikationen international tätiger<br>Marktforschungsinstitute<br>(z. B. CPS GfK, IMS, Ipsos usw.) | Publikationen internationaler<br>Marktforschungsinstitute (Kantar, TNS, Nielsen usw.) |



**Tab. 42:** Die größten internationalen Marktforschungsnetzwerke  
(Quelle: Bohne 2024).

| Unternehmen            | Hauptsitz            | Umsatz in Mrd. US \$ |
|------------------------|----------------------|----------------------|
| IQVIA                  | Durham, USA          | 5,209                |
| Gartner Inc.           | Stamford, USA        | 4,734                |
| The Nielsen Company    | New York, USA        | 3,500                |
| The Kantar Group       | London, UK           | 3,029                |
| Ipsos                  | Paris, France        | 2,539                |
| IHS MarkIT             | London, UK           | 2,133                |
| Costar/GoStar Group    | Washington D.C., USA | 1,944                |
| NielsenIQ              | New Yoek, USA        | 1,844                |
| IRI (Teil von Circana) | Illinois, USA        | 1,550                |





Buch S. 145

**Tab. 43:** Erfüllung von Anforderungen durch gängige eindimensionale Segmentationskriterien (Quelle: Eigene Abbildung).

|                                     | Kaufrelevante Unterteilung | Zeitliche Stabilität | Trennscharfe Messung | Wirtschaftliche Erhebung |
|-------------------------------------|----------------------------|----------------------|----------------------|--------------------------|
| Geographische Segmentierung         | –                          | 0                    | +                    | 0                        |
| Demografische Segmentierung         | –                          | +                    | +                    | 0                        |
| Sozioökonomische Segmentierung      | 0                          | 0                    | +                    | –                        |
| Psychografische Segmentierung       | +                          | 0                    | –                    | –                        |
| Verhaltensorientierte Segmentierung | +                          | –                    | +                    | +                        |



Buch S. 146

**Tab. 44:** Ausgewählte Lifestyle-Typen nach Leo Burnett (Quelle: Pepels 2023, S. 120 f).

---

*New health age adults*, sie orientieren ihre Konsumwünsche an der eigenen Gesundheit und der Nachhaltigkeit des Planeten.

---

*Woofs (Well-off older folks)*, den wohlhabenden Rentnern steht die Welt offen, ihnen ist nichts zu teuer, solange es ihrer Gesundheit dient.

---



Buch S. 149

Abb. 43: Sinus-Milieus in Deutschland 2024 (Quelle: Sinus-Institut 2024).

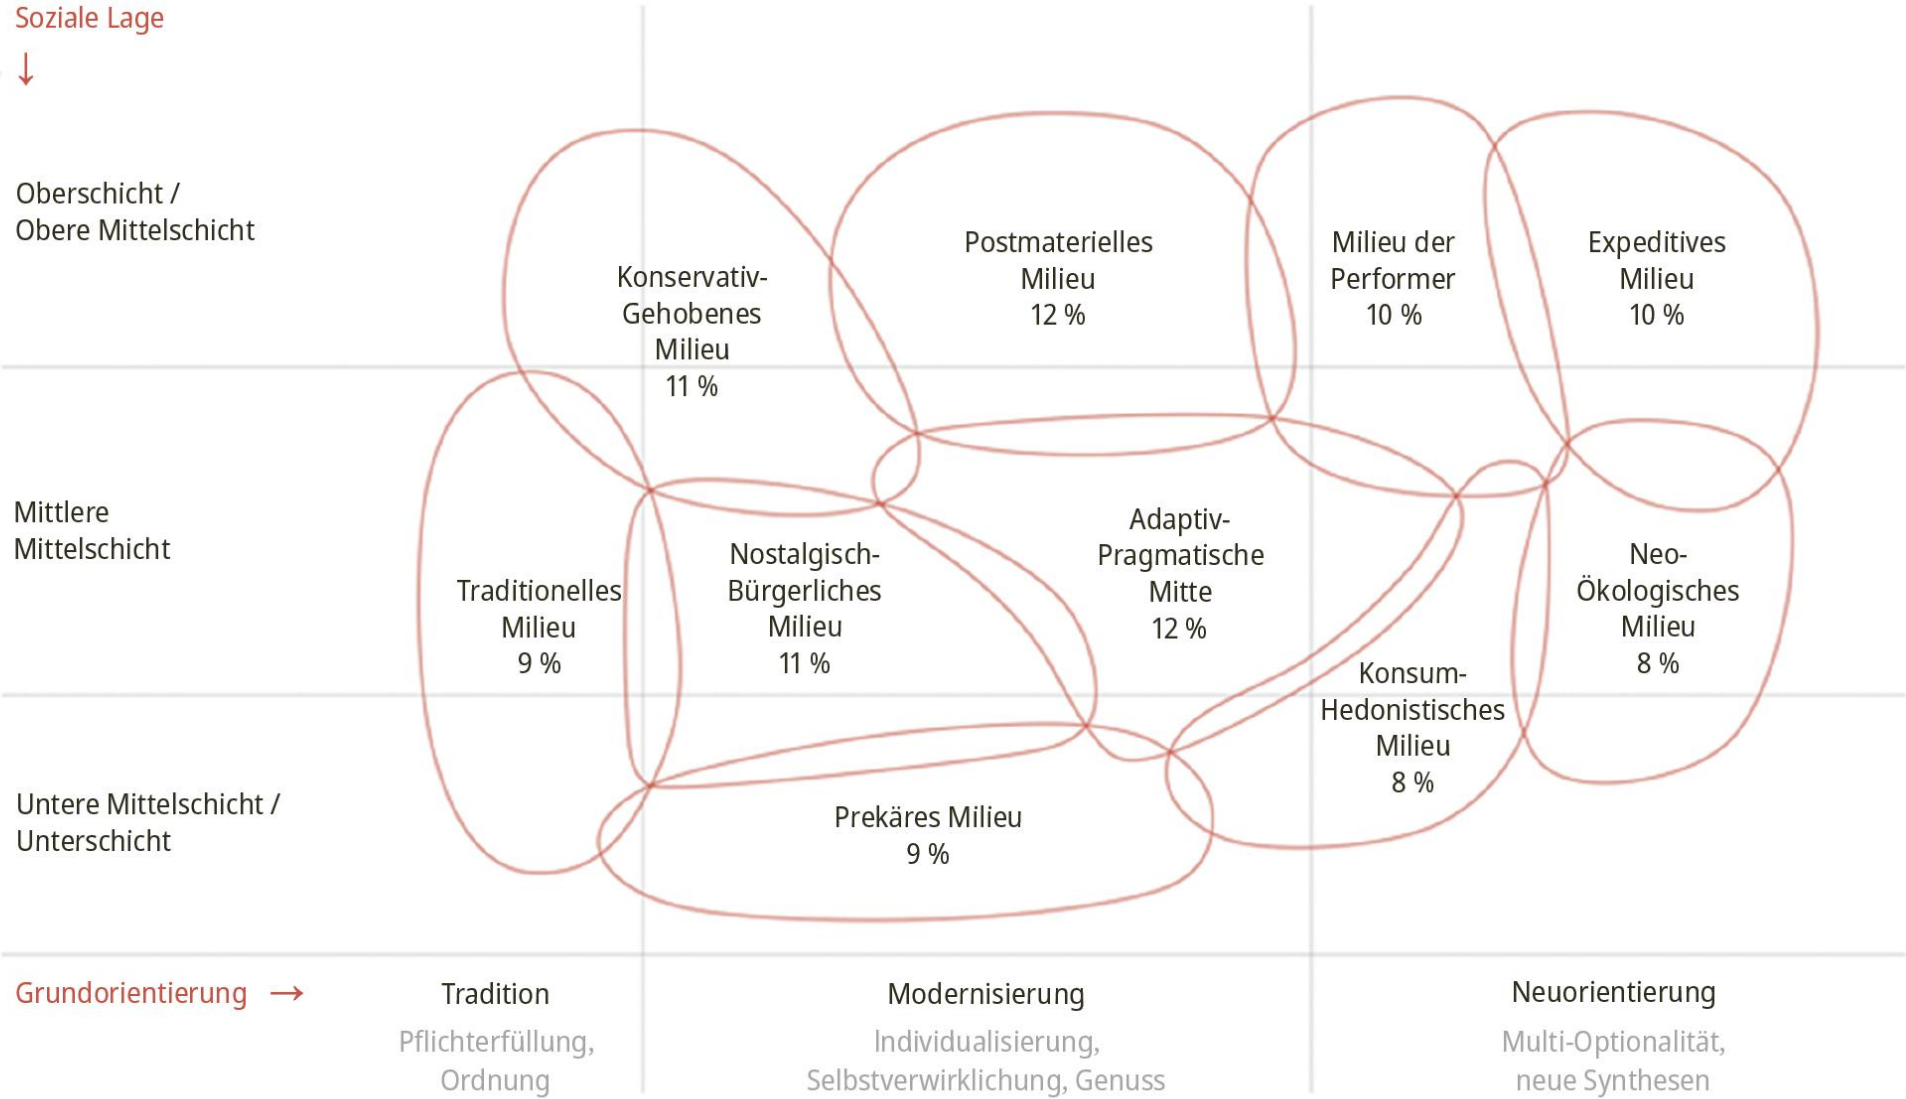



Buch S. 150

**Tab. 45:** Charakteristik eines spezifischen Milieus nach dem Sigma-Ansatzes (Quelle: Sigma 2020).

---

### Hedonistisches Milieu nach Sigma

---

Ob junge Leute mit „unkonventionellem“ Bodystyling und Outfit (was heute kaum noch auffällt), großstädtische Subkulturen oder “bildungsferne“ Unterschicht-Teens, sie eint die Anziehungskraft hedonistischer Lebens- und Freizeitstile (wobei fun & action, big kicks, etc. zunehmend virtuell konsumiert werden).

---



Buch S. 151

**Tab. 46:** Individuelle Auswertung zur Verbreitung des Golfsports in ausgewählten Sigma-Milieus (Quelle: Gesellschaft für integrierte Kommunikationsforschung 2015).

| Sigma-Milieu                  | Basis<br>(alle: 70,52 Mio.) | Freizeitbeschäftigung Golf spielen |           |        |        |
|-------------------------------|-----------------------------|------------------------------------|-----------|--------|--------|
|                               |                             | häufig                             | ab und zu | selten | nie    |
| Etabliertes Milieu            | 5,69 Mio.                   | 0,8 %                              | 1,5 %     | 1,7 %  | 96,0 % |
| Aufstiegsorientiertes Milieu  | 12,45 Mio.                  | 0,6 %                              | 1,6 %     | 2,8 %  | 95,0 % |
| Hedonistisches Milieu         | 5,50 Mio.                   | 0,3 %                              | 0,8 %     | 2,3 %  | 96,6 % |
| Modernes bürgerliches Milieu  | 8,17 Mio.                   | 0,3 %                              | 0,6 %     | 0,9 %  | 98,2 % |
| Traditionelles Arbeitermilieu | 3,02 Mio.                   | 0,1 %                              | 0,1 %     | 0,4 %  | 99,4 % |

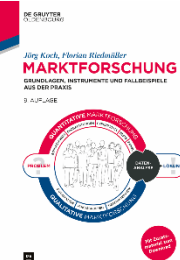

Buch S. 152

Planungsprozess vorher

Σ 80 000 Artikel

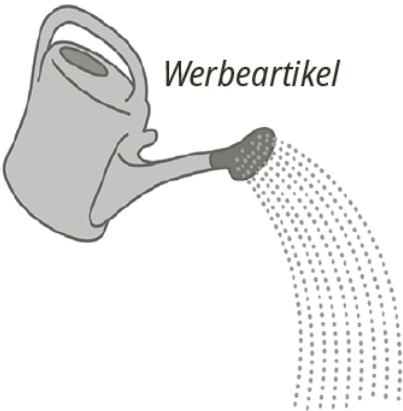

Artikelselektion nur nach Werbeumsätzen optimiert – unspezifisch über alle Kunden

Planungsprozess jetzt

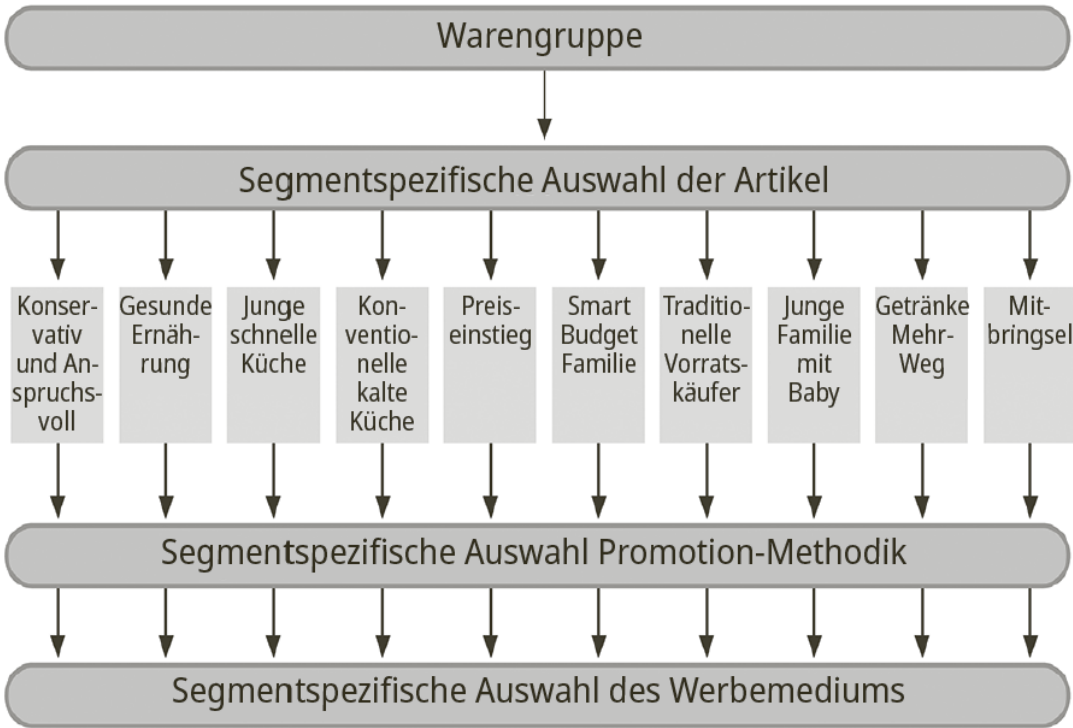

➡ Prozess berücksichtigt zusätzlich noch die Promotion aus dem Vorjahr sowie den aktuellen Marketingrahmenplan

**Abb. 44:** Segmentspezifischer Planungsprozess für Promotions bei real. (Quelle: Schwertfeger/Uphues 2013, S. 34).



Buch S. 154

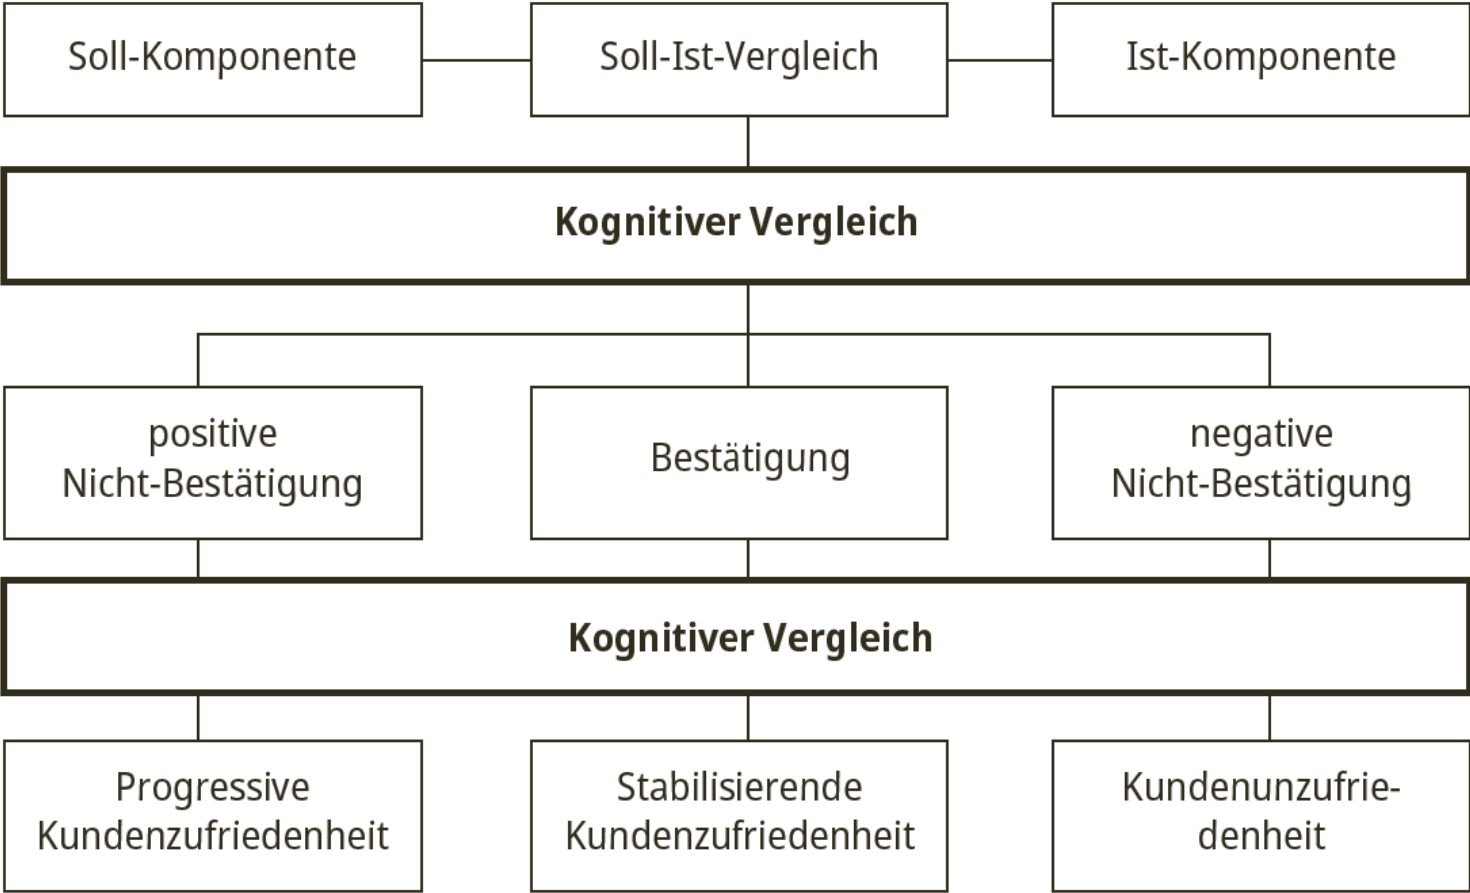

**Abb. 45:** Kundenzufriedenheit als emotionale Reaktion auf einen kognitiven Vergleich (Quelle: Scharnbacher/Kiefer 2003, S. 11).



Buch S. 154

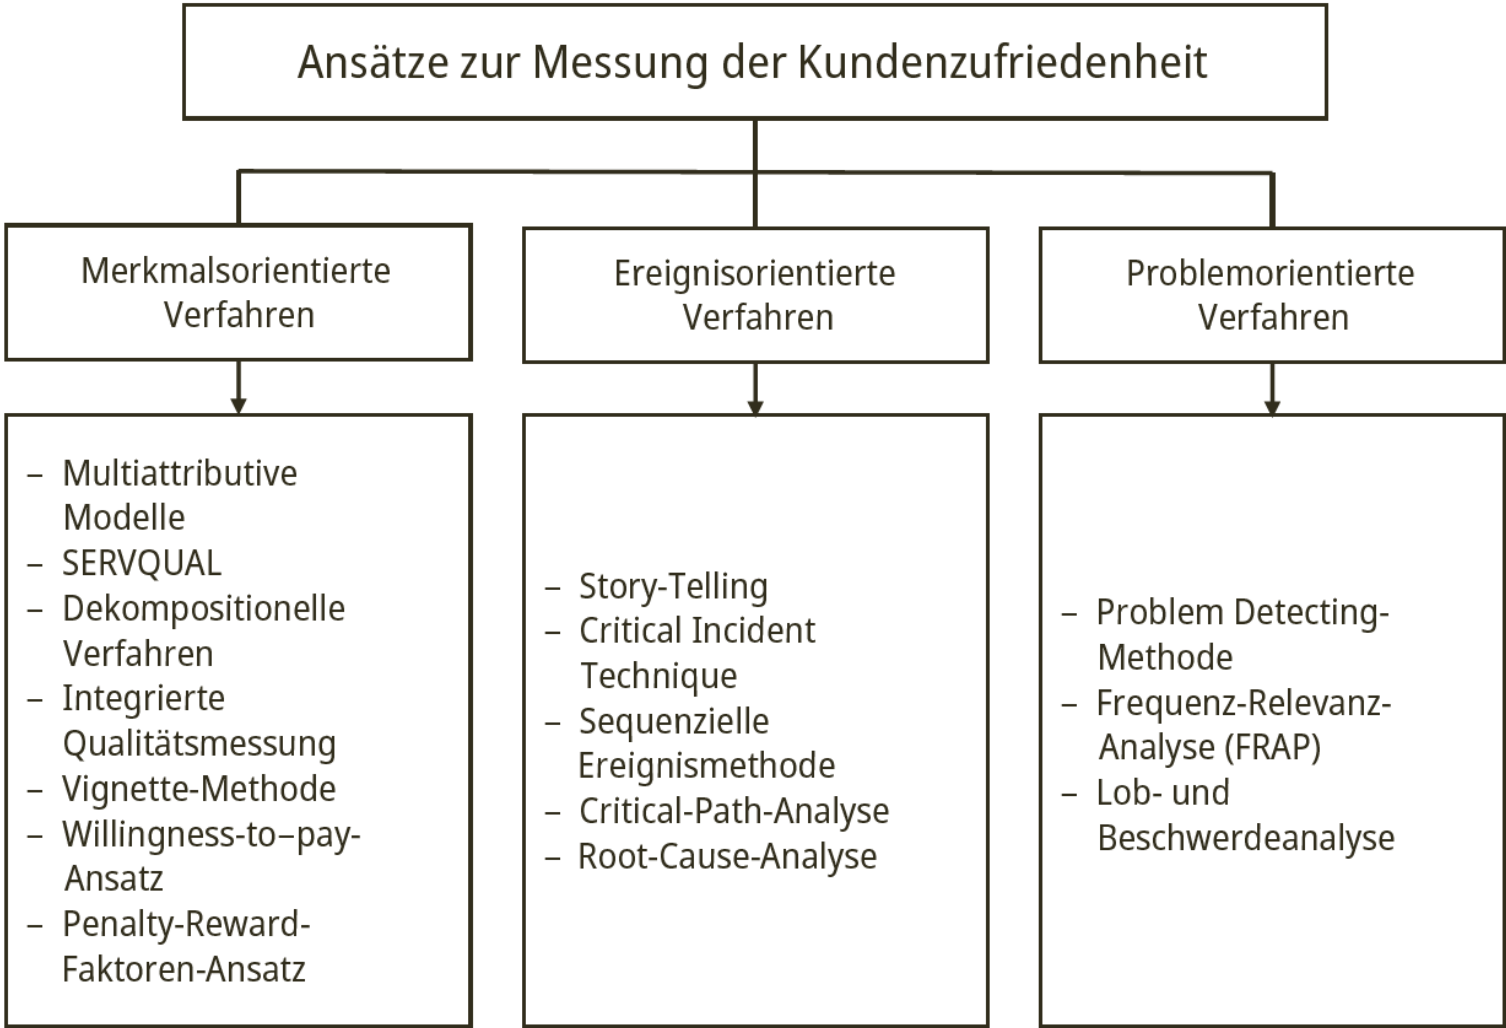

**Abb. 46:** Verfahren und Methoden zur Kundenzufriedenheitsmessung (Quelle: Meffert et al. 2024, S. 119).





Buch S. 159

### Kreismethode

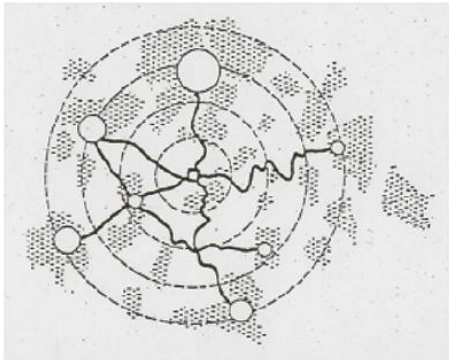

„Zuerst studiere ich bei der Post die Haushaltslisten des Ortes. Dann nehme ich einen Zirkel, mache einen Kreis, bei dem auch die bis zu 5 km entfernten Haushalte erfasst werden. Jene Zahl die dabei herauskommt multipliziere ich mit 3 und habe so die ungefähre Einwohnerzahl. Liegt diese über 15000, so eröffne ich dort eine Filiale“.  
Österreich / Massenfilialist

Quelle: Berekoven

### Zeitdistanzmethode

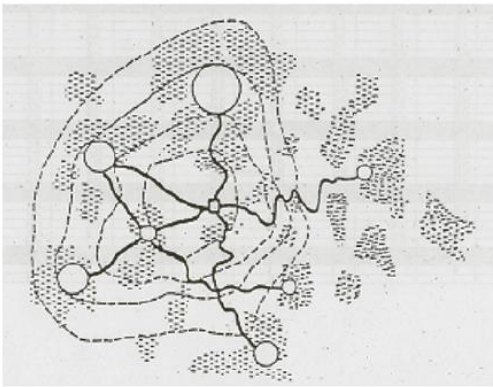

### Ökonometrische Methode

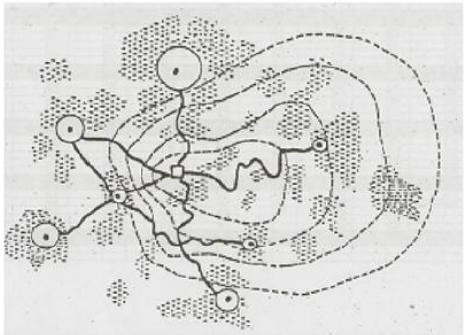

**Abb. 47:** Veränderung des Einzugsgebiets analog zur eingesetzten Methode (Quelle: Eigene Abbildung in Anlehnung an Berekoven 1995).



Buch S. 160

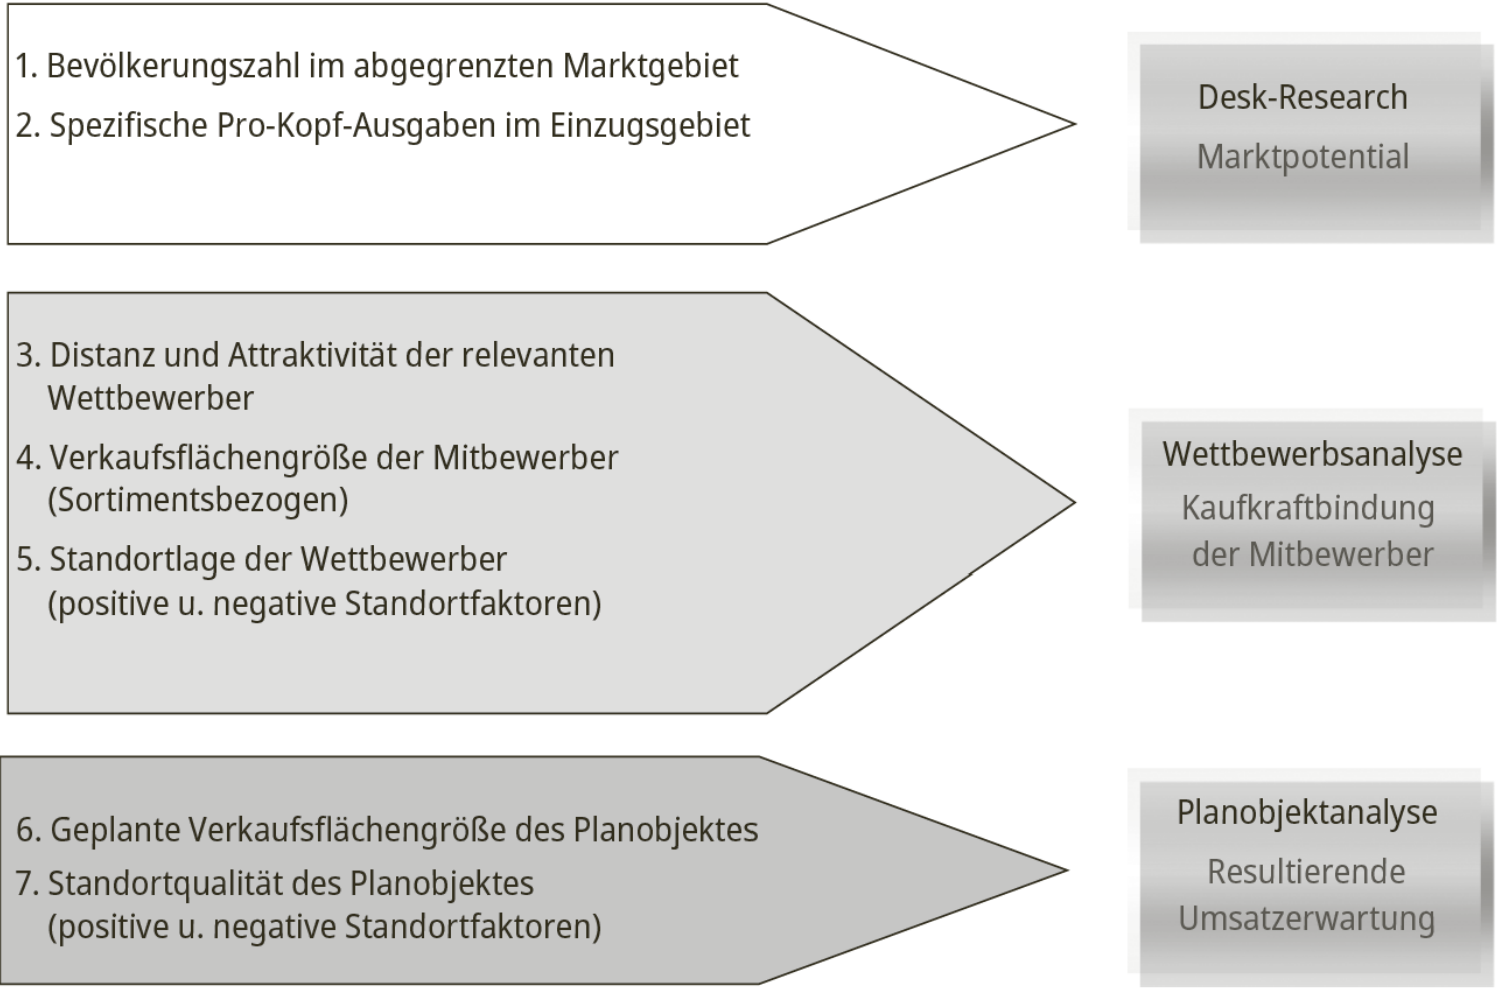

**Abb. 48:** Vorgehensweise der ökonometrischen Methode bei der Standortbewertung (Quelle: GfK Nürnberg).



Buch S. 162

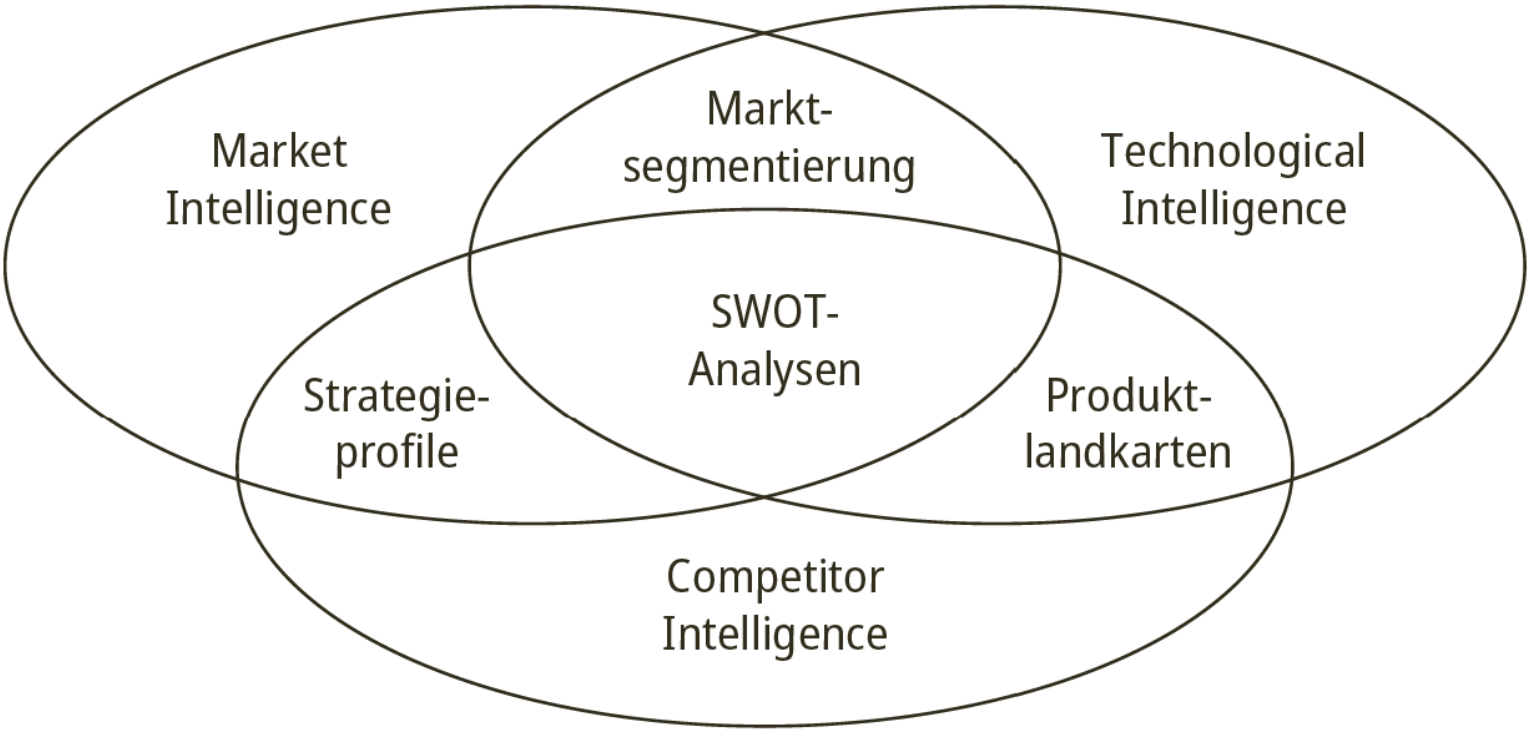

**Abb. 49:** Informations- und Erkenntnisbereiche von Competitive Intelligence (Quelle: Eigene Abbildung).



Buch S. 162

**Tab. 47:** Erhebungsprofil für eine Competitive Intelligence Analyse am Beispiel des Automobilmarkts  
(Quelle: Eigene Abbildung in Anlehnung an Aaker/Moorman 2024, S. 83).

|                      | Marktebene        | Technologieebene                    | Konkurrenzebene                                 |
|----------------------|-------------------|-------------------------------------|-------------------------------------------------|
| Erfolgsentscheidend  | Marktanteil       | Produktqualität,<br>Servicequalität | Produktdifferenzierung,<br>Händlerzufriedenheit |
| Erfolgsunterstützend | Markenbekanntheit |                                     | Finanzlage, Management                          |



**Tab. 48:** Beispiele für unterschiedliche Beschaffungsarten zu Competitive Intelligence Aspekten (Quelle: Eigene Abbildung).

|                             | Marktebene                                                                                                    | Technologieebene                                                                                                | Konkurrenzebene                                                                                                        |
|-----------------------------|---------------------------------------------------------------------------------------------------------------|-----------------------------------------------------------------------------------------------------------------|------------------------------------------------------------------------------------------------------------------------|
| <b>Weißer Beschaffung</b>   | Clipping-Journals, d. h. die gezielte Auswertung von Zeitschriften und Datenbanken zur Marktsituation         | Patentanalyse, d. h. gezielte Auswertung von Patentanmeldungen und -veröffentlichungen                          | Offizieller Besuch beim Tag der offenen Tür oder bei Tagungspräsentationen der Wettbewerber                            |
| <b>Graue Beschaffung</b>    | Dumper Diving, d. h. das Durchforsten von Papier-Mülleimern zu Konzeptpapieren bei Meetings von Wettbewerbern | Messescreening, d. h. Zugang zu den Exponaten eines Messestands von Konkurrenten ohne bzw. unter falschen Namen | Falsche Jobangebote, d. h. das Durchführen von Interviews mit Konkurrenzmitarbeitern zu Stellen, die es gar nicht gibt |
| <b>Schwarze Beschaffung</b> | Abhöranlagen in Hotel- oder Meetingräumen                                                                     | Diebstahl von Prototypen                                                                                        | Hacken von Wettbewerbsservern                                                                                          |

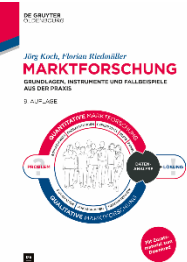

Buch S. 164

**Tab. 49:** Exemplarisches Competitive Strength Grid für den europäischen Automobilmarkt (Quelle: Aaker/Moorman 2024, S. 83).

| Charakter                   | Kriterium              | BMW | Ford | Mercedes | Volvo |
|-----------------------------|------------------------|-----|------|----------|-------|
| <i>erfolgsentscheidend</i>  | Produktqualität        | 0   | –    | 0        | 0     |
|                             | Produktdifferenzierung | +   | –    | +        | +     |
|                             | Händlerzufriedenheit   | +   | 0    | +        | 0     |
|                             | Marktanteil            | +   | +    | +        | 0     |
|                             | Servicequalität        | +   | –    | 0        | +     |
| <i>erfolgsunterstützend</i> | Finanzlage             | +   | +    | 0        | 0     |
|                             | Management             | 0   | +    | –        | 0     |
|                             | Markenbekanntheit      | +   | +    | +        | 0     |
|                             | ...                    |     |      |          |       |

+ = überdurchschnittlich // 0 = durchschnittlich // – = unterdurchschnittlich

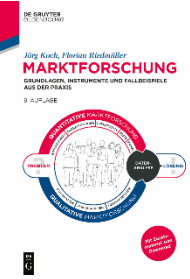

Buch S. 168

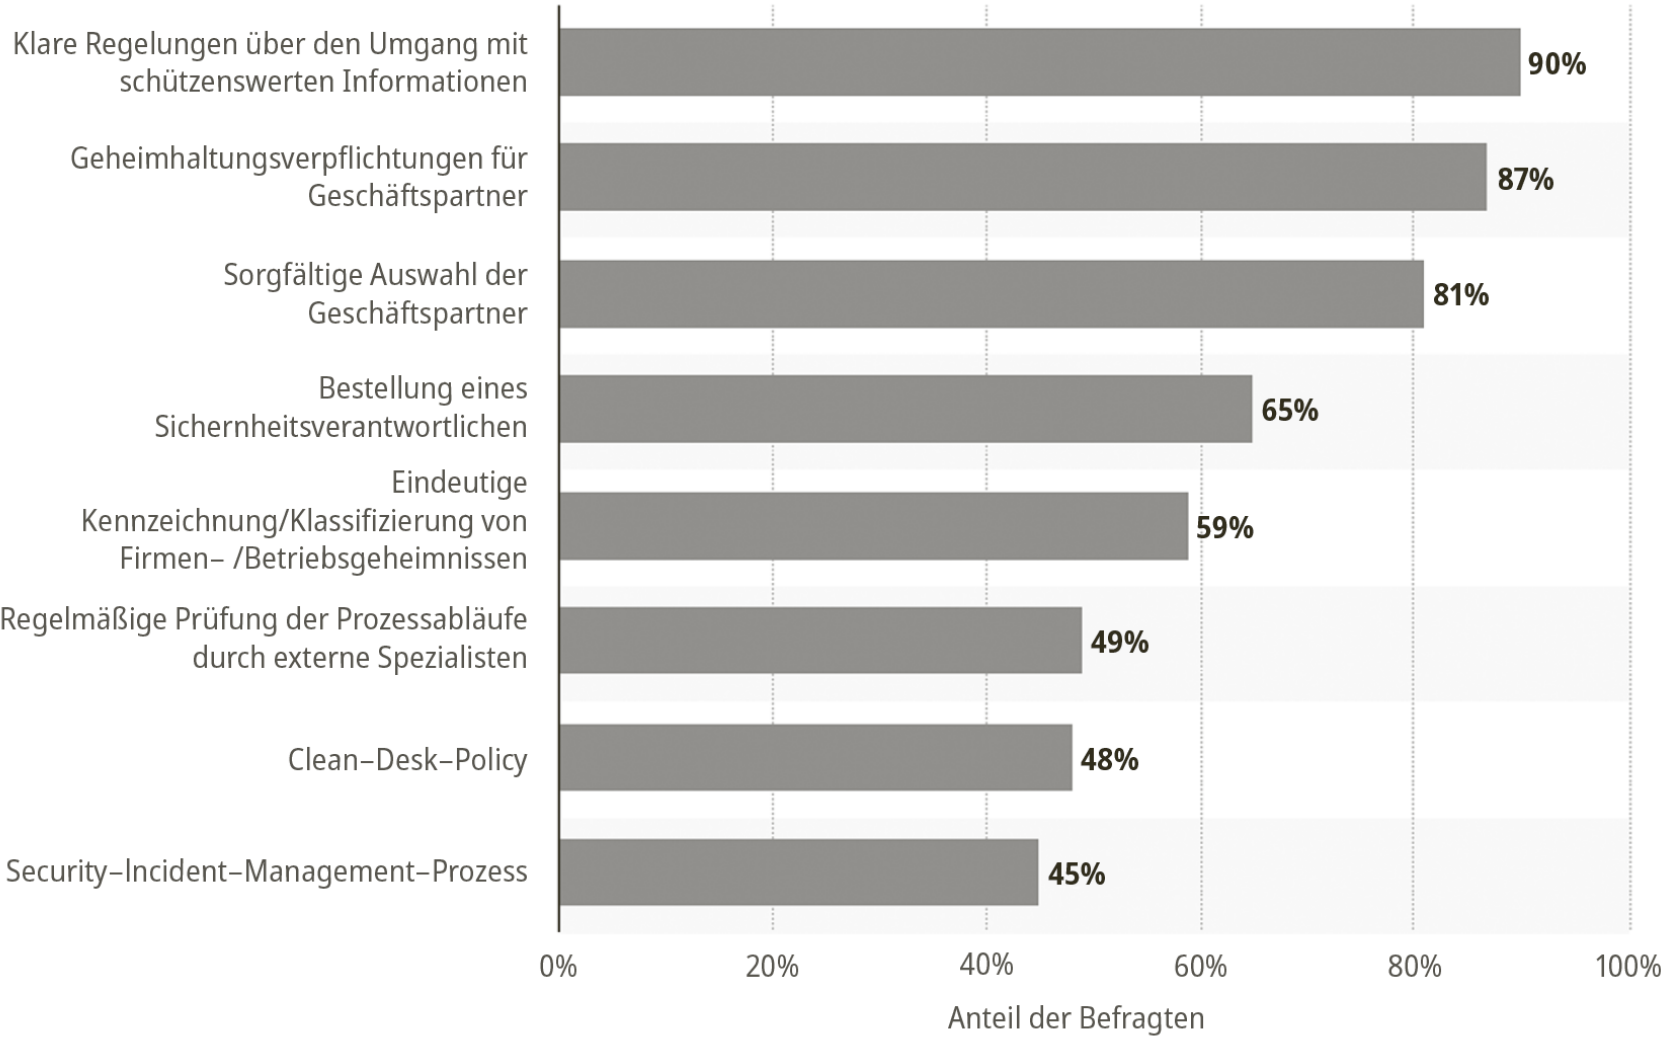

Abb. 50: EY Forensics Datenklaustudie 2023 (Quelle: Meseke/Koch 2023, S. 39).





**Tab. 50:** Beispielrechnung und Erklärung zum Marktgesetz nach Parfitt-Collins (Quelle: Eigene Abbildung).

|                                                                         |   |                                                                                      |   |                                                                               |   |                                                                                                                                       |
|-------------------------------------------------------------------------|---|--------------------------------------------------------------------------------------|---|-------------------------------------------------------------------------------|---|---------------------------------------------------------------------------------------------------------------------------------------|
| 15,8 %                                                                  | * | 55 %                                                                                 | * | 115 %                                                                         | = | 10 %                                                                                                                                  |
| Erstkaufpenetration                                                     |   | Bedarfsdeckungsrate                                                                  |   | Kaufintensität                                                                |   | Geschätzter Marktanteil                                                                                                               |
| = Anteil der erreichten Erstkäufer an den Gesamtkäufern der Warengruppe |   | = Wiederkaufsmenge der Erstkäufer in der Folgeperiode als %-Anteil vom Gesamteinkauf |   | = Umsätze der Erstkäufer in Relation zu allen anderen Käufern der Warengruppe |   | Marktanteil auf Basis einer Modellrechnung, die einen gestützten Bekanntheitsgrad und eine Distributionsrate von je 100 % unterstellt |





Buch S. 177

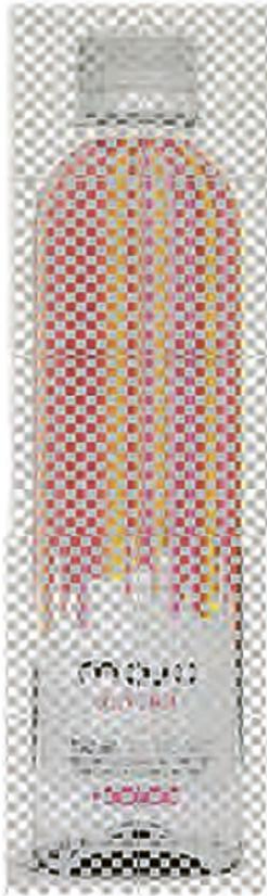

|                          |  |  |  |  |  |
|--------------------------|------------------------------------------------------------------------------------|-------------------------------------------------------------------------------------|-------------------------------------------------------------------------------------|-------------------------------------------------------------------------------------|-------------------------------------------------------------------------------------|
| Great Taste              | 68                                                                                 | 54                                                                                  | 62                                                                                  | 59                                                                                  | 83                                                                                  |
| Personal Relevance       | 63                                                                                 | 52                                                                                  | 27                                                                                  | 52                                                                                  | 62                                                                                  |
| High Quality             | 54                                                                                 | 41                                                                                  | 37                                                                                  | 56                                                                                  | 92                                                                                  |
| Value Perceptions        | 52                                                                                 | 52                                                                                  | 47                                                                                  | 58                                                                                  | 62                                                                                  |
| Trust                    | 51                                                                                 | 47                                                                                  | 49                                                                                  | 49                                                                                  | 51                                                                                  |
| Better than other brands | 49                                                                                 | 75                                                                                  | 52                                                                                  | 56                                                                                  | 51                                                                                  |
| Speed of Noting          | 35                                                                                 | 75                                                                                  | 58                                                                                  | 56                                                                                  | 92                                                                                  |
| Shop-Ability             | 80                                                                                 | 59                                                                                  | 62                                                                                  | 78                                                                                  | 45                                                                                  |
| Visibility on shelf      | 85                                                                                 | 85                                                                                  | 85                                                                                  | 85                                                                                  | 85                                                                                  |
| Buying                   | 55                                                                                 | 43                                                                                  | 35                                                                                  | 78                                                                                  | 86                                                                                  |

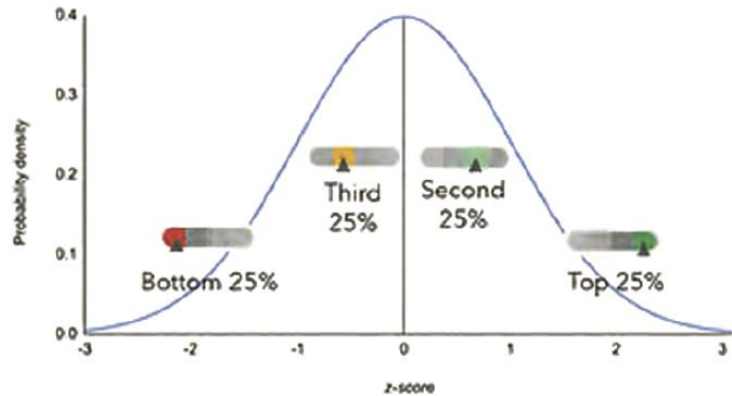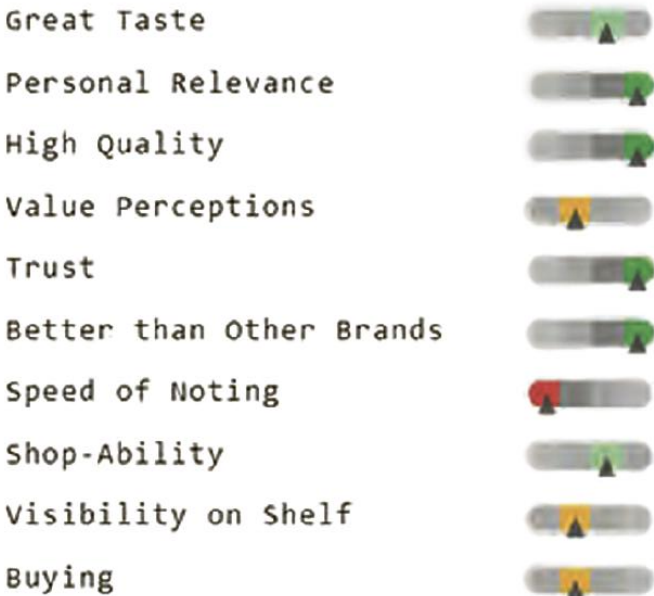

Abb. 51: Bewertung eines neuen Verpackungsdesigns mit Unterstützung von KI (Quelle: Dössel 2022, S. 24).

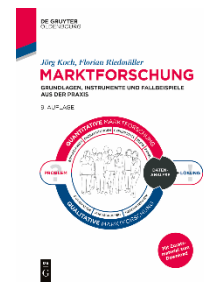

Buch S. 180

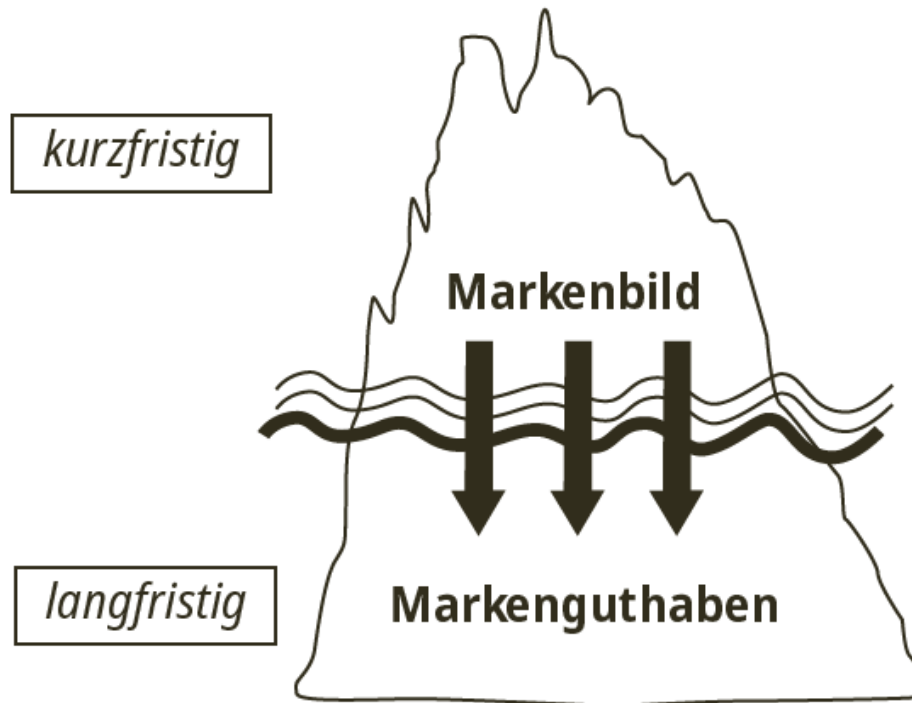

- Markenbekanntheit
- Subjektiv wahrgenommener Werbedruck
- Einprägsamkeit der Werbung
- Markenuniqueness
- Klarheit des inneren Bilds
- Attraktivität des inneren Bilds
- Markensympathie
- Markenvertrauen
- Markenloyalität

**Abb. 52:** Ursprungsversion des Eisberg-Modells (Quelle: Andresen/Esch, 1994, S. 212–230).



Buch S. 181

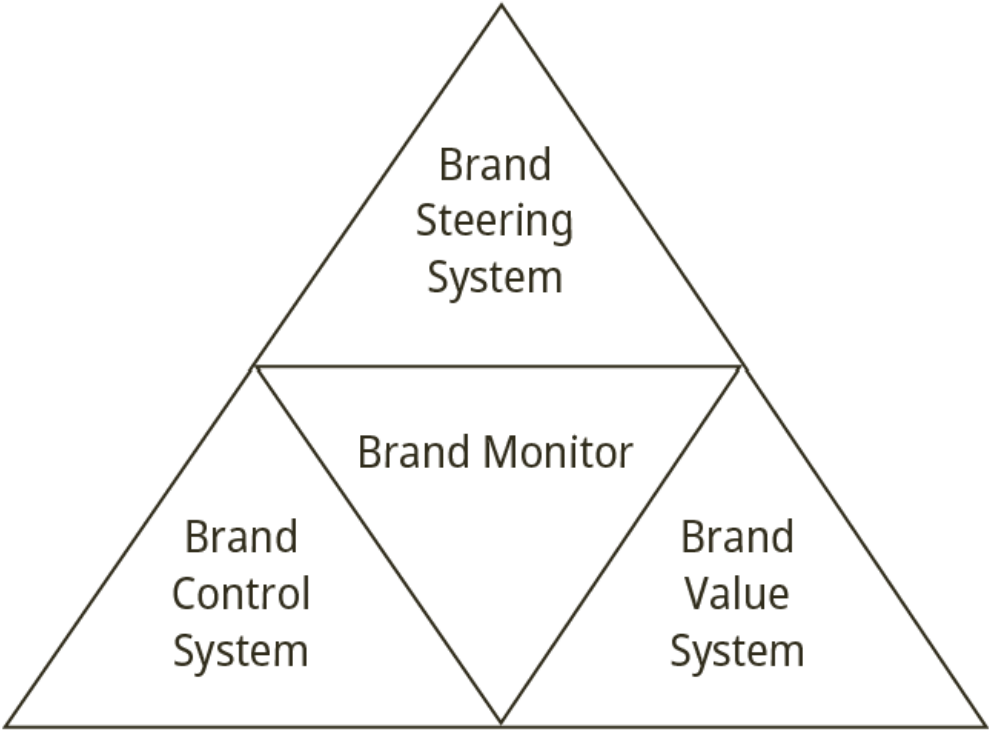

**Abb. 53:** Modell des Brand Performancer (Quelle: A. C. Nielsen 1994).



Buch S. 181

**Tab. 51:** Markt- und konsumentenbezogene Indikatoren (Quelle: A. C. Nielsen 1994).

| marktbezogene Indikatoren                                                                                                                                                        | konsumentenbezogene Indikatoren                                                                                                     |
|----------------------------------------------------------------------------------------------------------------------------------------------------------------------------------|-------------------------------------------------------------------------------------------------------------------------------------|
| <ul style="list-style-type: none"><li>– Marktvolumen</li><li>– Marktwachstum</li><li>– Marktanteil</li><li>– Marktanteilsentwicklung</li><li>– gewichtete Distribution</li></ul> | <ul style="list-style-type: none"><li>– Bekanntheitsgrad der Marke</li><li>– Marken im relevant set</li><li>– Markentreue</li></ul> |

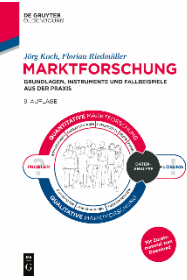

Buch S. 184

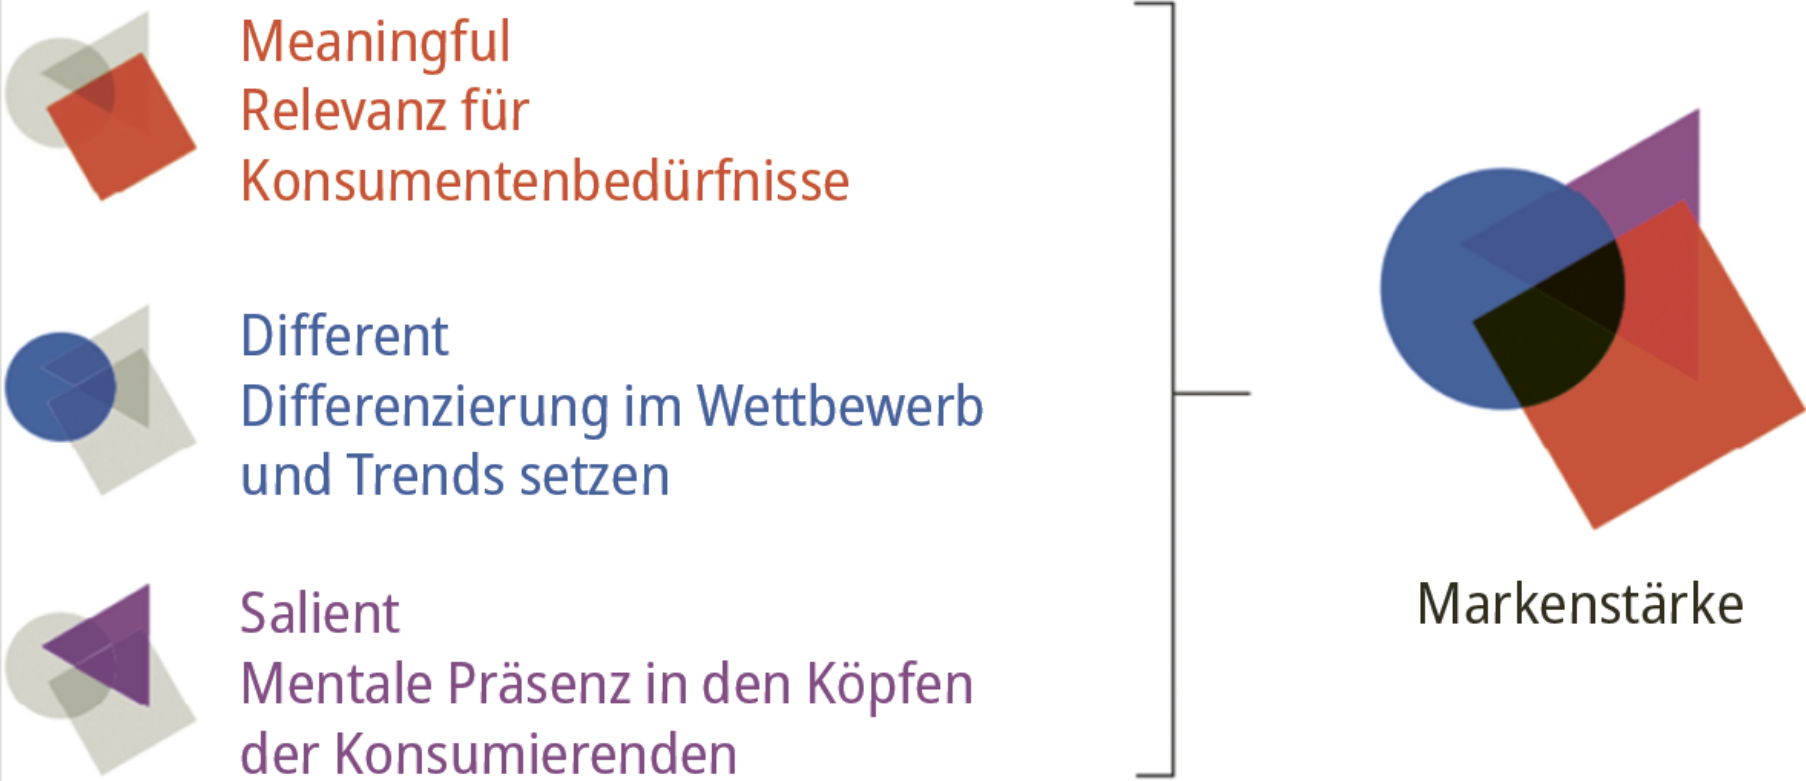

**Abb. 54:** Meaningful Different Salient Framework von Kantar (MDS).



Buch S. 184

# KANTAR BRANDZ

## TOP 50 MOST VALUABLE GERMAN BRANDS 2024

| Rank | Brand            | Brand Value (U\$M) | Rank | Brand           | Brand Value (U\$M) |
|------|------------------|--------------------|------|-----------------|--------------------|
| 1    | TELEKOM/T-MOBILE | 73,483             | 26   | DEUTSCHE POST   | 2,564              |
| 2    | SAP              | 51,49              | 27   | KAUFLAND        | 2,472              |
| 3    | SIEMENS          | 28,24              | 28   | JACOBS          | 2,343              |
| 4    | MERCEDES-BENZ    | 23,588             | 29   | DM              | 2,295              |
| 5    | BMW              | 23,281             | 30   | SPARKASSE       | 2,088              |
| 6    | DHL              | 19,793             | 31   | REWE            | 1,973              |
| 7    | ALDI             | 18,298             | 32   | LENOR           | 1,96               |
| 8    | PORSCHE*         | 16,75              | 33   | HUGO BOSS       | 1,932              |
| 9    | BOSCH            | 16,246             | 34   | ROSSMANN        | 1,921              |
| 10   | ADIDAS           | 14,655             | 35   | MIELE           | 1,827              |
| 11   | LIDL             | 12,737             | 36   | LUFTHANSA       | 1,822              |
| 12   | E.ON             | 9,336              | 37   | OTTO            | 1,687              |
| 13   | ALLIANZ          | 8,58               | 38   | MAN             | 1,545              |
| 14   | NIVEA            | 7,205              | 39   | BECK'S          | 1,396              |
| 15   | AUDI             | 7,122              | 40   | COMMERZBANK     | 1,352              |
| 16   | VOLKSWAGEN       | 6,5                | 41   | BECHTLE         | 1,341              |
| 17   | DB SCHENKER      | 3,659              | 42   | FIELMANN        | 1,324              |
| 18   | CONTINENTAL      | 3,621              | 43   | TUI             | 1,31               |
| 19   | ENBW             | 3,53               | 44   | FLINK           | 1,302              |
| 20   | KNORR            | 3,524              | 45   | PERSIL          | 1,254              |
| 21   | EDEKA            | 3,055              | 46   | 1&1             | 1,231              |
| 22   | PUMA             | 2,83               | 47   | SIXT            | 1,177              |
| 23   | DEUTSCHE BANK    | 2,761              | 48   | BOFROST         | 1,156              |
| 24   | DPD              | 2,715              | 49   | HELIOS KLINIKEN | 1,15               |
| 25   | ZALANDO          | 2,63               | 50   | SCHWARZKOPF     | 982                |

\*Brand Value is restated

Total Value of Kantar BrandZ  
Most Valuable German Brands 2024 (U\$M)

\$407,030 M

YOY  
2024 vs 2023

+9%

Abb. 55: Top 50 wertvollsten Deutschen Marken 2024, Kantar BrandZ.



Buch S. 186

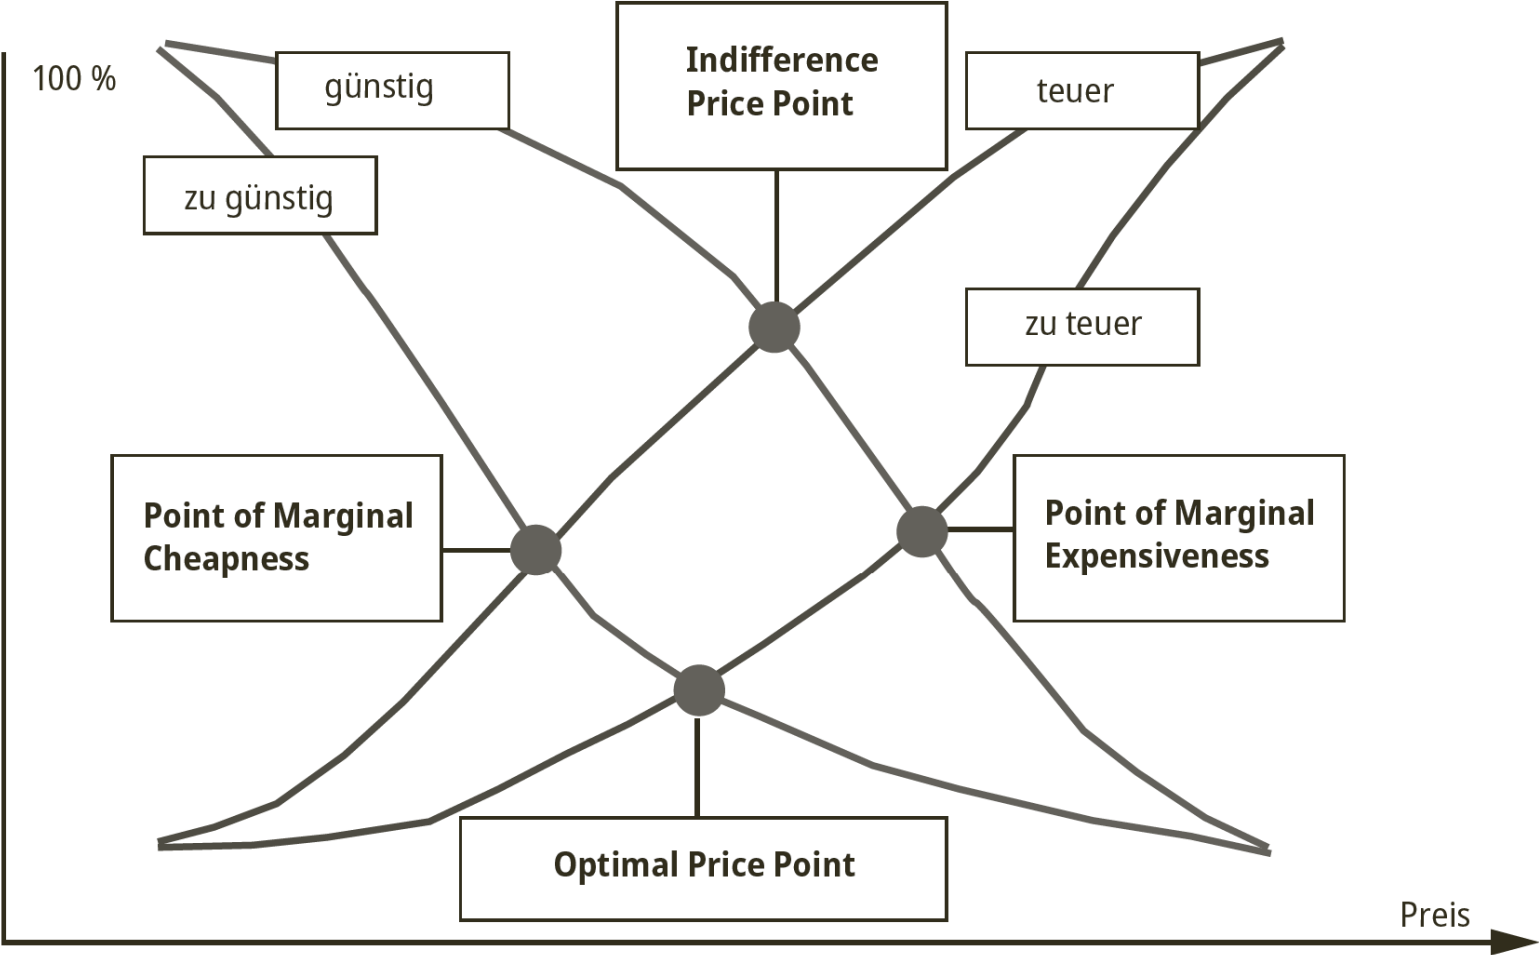

*Optimal Price Point (OPP): Schnittpunkt der Kurven „zu günstig“ (invers) und „zu teuer“*

**Abb. 56:** Der optimale Preispunkt – Ergebnisdarstellung des PSM-Ansatzes (Quelle: Krämer/Dethlefsen/ Baigge 2017, S. 46).



Buch S. 188

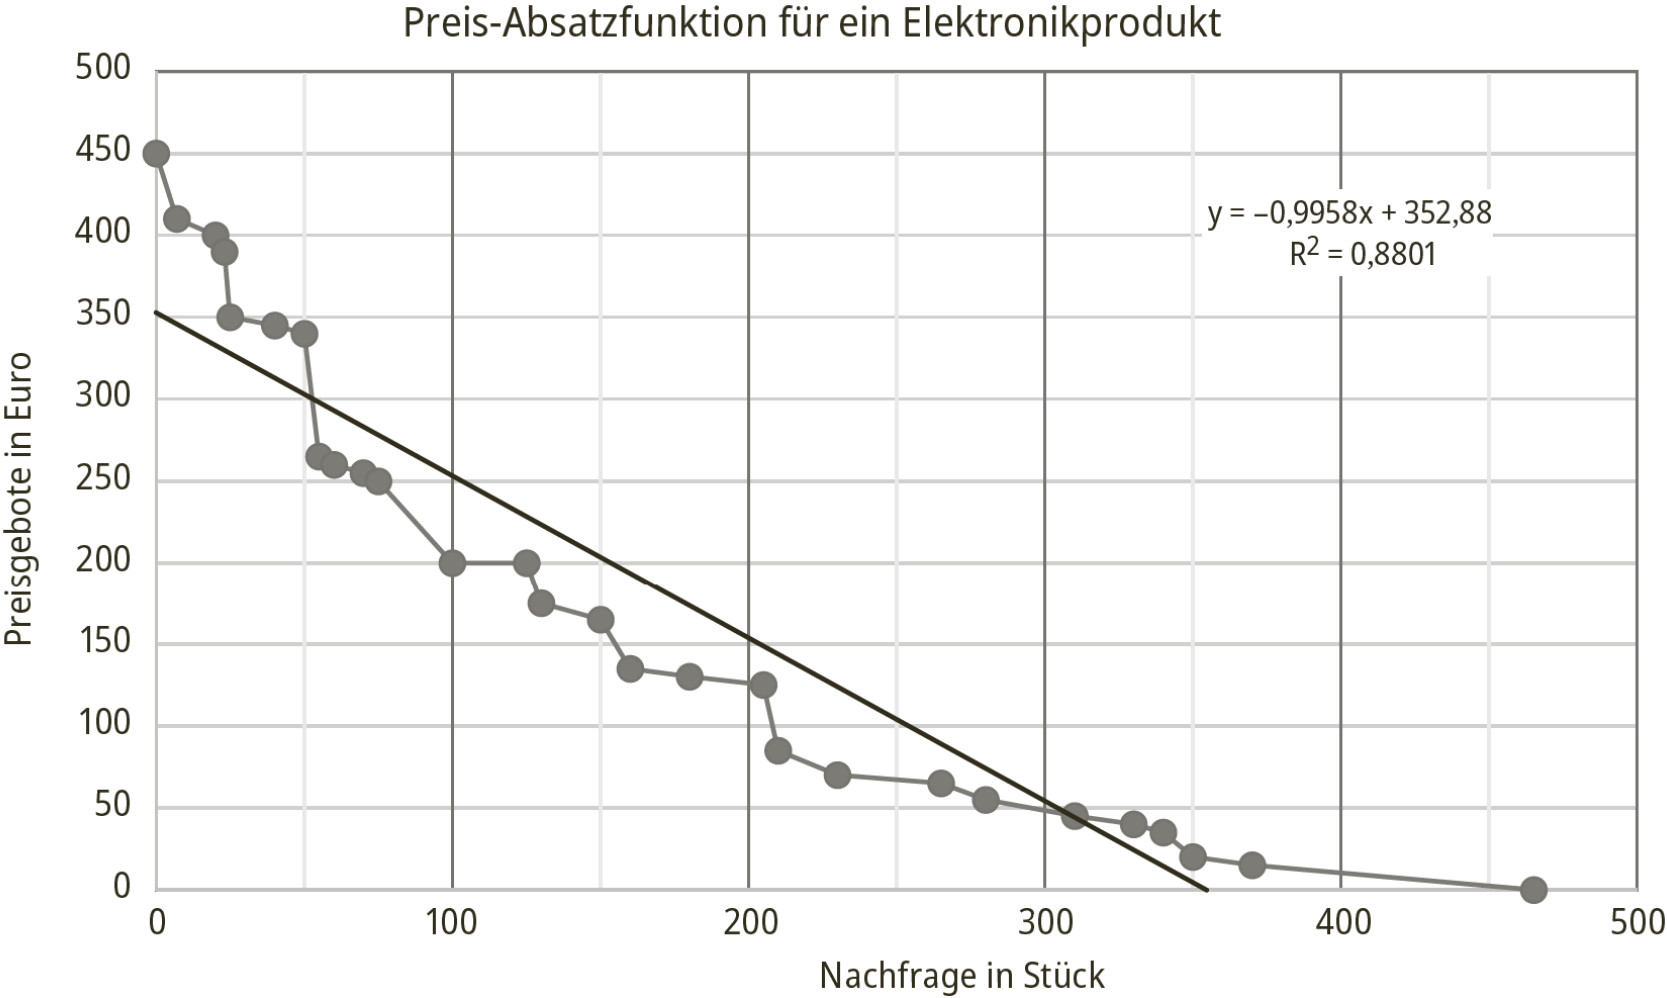

**Abb. 57:** Bestimmung von Preis-Absatz-Funktionen über Internet-Auktionen (Quelle: Winkelmann/Spandl 2023, S. 393).



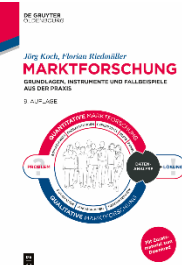

**Tab. 52:** Klassische Werbewirkungsmodelle im Überblick (Quelle: Schweiger/Schrattenecker 2013, S. 205).

| Autor           | Werbewirkung (psychologische Zielgrößen) |                        |                     |                |                   | Werbeerfolg |
|-----------------|------------------------------------------|------------------------|---------------------|----------------|-------------------|-------------|
|                 | 1                                        | 2                      | 3                   | 4              | 5                 | 6           |
| Lewis           | Attention                                | Interest               | Desire              | –              | –                 | Action      |
| Lavidge-Steiner | Awareness                                | Knowledge              | Liking              | Preference     | Conviction        | Purchase    |
| Colley          | Awareness                                | Comprehension          | Conviction          | –              | –                 | Action      |
| Seyffert        | Sinneswirkung                            | Aufmerksamkeitswirkung | Vorstellungswirkung | Gefühlswirkung | Gedächtniswirkung | Handlung    |
| McGuire         | Aufmerksamkeit                           | Kenntnis               | Einverständnis      | Behalten       | –                 | Verhalten   |
| Kroeber-Riel    | Aufmerksamkeit                           | Kognitive Vorgänge     | Emotionale Vorgänge | Einstellung    | Kaufabsicht       | Kauf        |



Buch S. 173

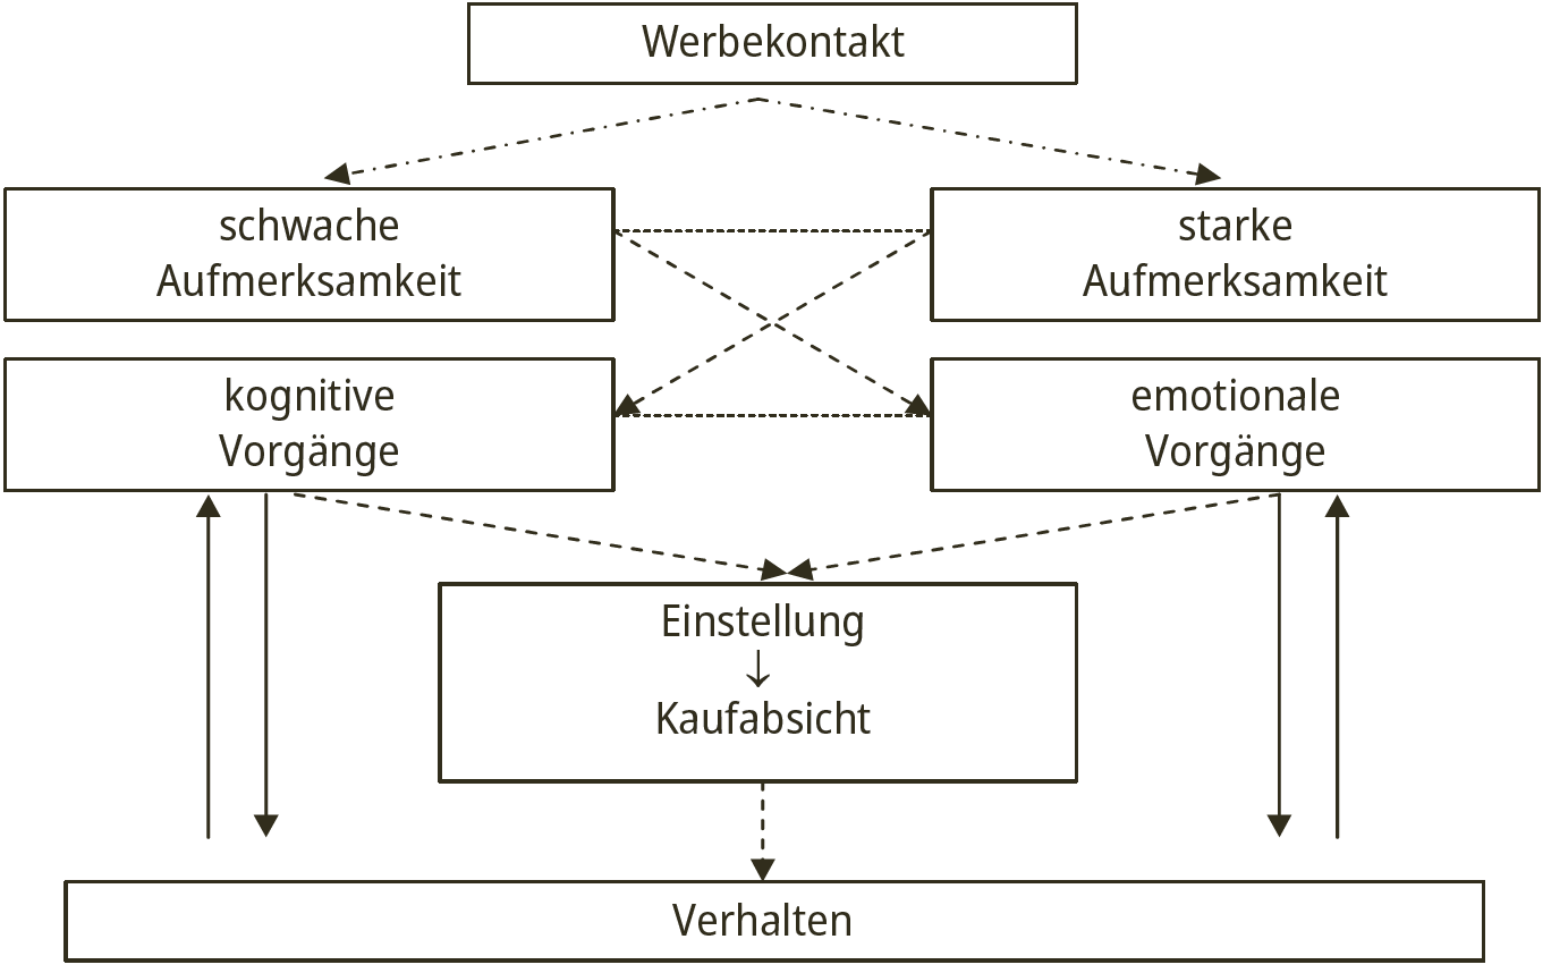

**Abb. 58:** Grundmodell der Werbewirkung (Quelle: Kroeber-Riel/Weinberg/Gröppel-Klein 2019, S. 559).



Buch S. 192/193

Tab. 53: Werbewirkungskette mit zugeordneten Messinstrumenten (Quelle: Eigene Abbildung).

| Wirkungsstufen                          | Wirkungsindikatoren                                                                              | Wirkungsmaße/<br>Messkriterien                                                                                          | Mess- bzw.<br>Erhebungsinstrumente                                                              |
|-----------------------------------------|--------------------------------------------------------------------------------------------------|-------------------------------------------------------------------------------------------------------------------------|-------------------------------------------------------------------------------------------------|
| Wahrnehmung                             | Aufmerksamkeit/<br>Impact<br>Anmutung<br>Aktualgenese<br>Gestaltfestigkeit<br>Wahrnehmungsablauf | Betrachtungsdauer<br>Spontanassoziationen<br>Wahrnehmungsschwellen<br>Prägnanz<br>Fixation/Sakkaden                     | Blickverlaufskamera<br>Kurzexposition<br>Tachistoskop<br>Perimeter<br>Blickverlaufskamera       |
| psycho-biologische<br>Aktivierung       | Affektive Erregung                                                                               | Hautwiderstand<br>Hauttemperatur<br>Pulsrate<br>Pupillenreaktion                                                        | Elektrodermale Hautreaktion<br>Infrarot-Thermometer<br>Herzfrequenzmessgerät<br>Pupillometer    |
| neuro-<br>physiologische<br>Aktivierung | Positive/negative<br>Gehirnreaktion                                                              | Neuronenaktivität<br>Stoffwechselprozesse                                                                               | Elektroenzephalographie<br>Magnetresonanztomographie                                            |
| Verarbeitung                            | Lernen<br>Verstehen<br>Erinnern                                                                  | Bekanntheit<br>Botschaftsinhalt<br>Produktkenntnisse<br>Sloganpenetration<br>Wiedererkennung<br>Erinnerte Werbeninhalte | Befragung<br>Foldertest<br>Copytest<br>Day-After-Recall-Test<br>Recognition-Test<br>Recall-Test |
| Bewertung                               | Akzeptanz                                                                                        | Einstellungen<br>Assoziationen<br>Emotionen                                                                             | Semantisches Differenzial<br>Mentale Reichweite<br>Emotion Tracking                             |
| Verhalten                               | Kauf                                                                                             | Kaufabsicht<br>Probier-/Erstkäufer<br>Wiederkäufer                                                                      | Markttest<br>Verbraucherpanel<br>Verbraucherpanel                                               |

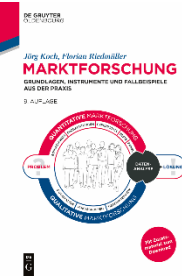

Buch S. 194

**Tab. 54:** Indikatoren und dazugehörige Messgeräte (Quelle: Eigene Abbildung).

| Indikator              | Messgerät                               |
|------------------------|-----------------------------------------|
| Hautwiderstandsmessung | = elektrodermale Hautreaktion (EDR/PGR) |
| Gehirnstrommessung     | = Elektroenzephalogramm (EEG)           |
| Pulsrate               | = Herzfrequenzmesser                    |
| Pupillenveränderung    | = Pupillometer                          |
| Hauttemperatur         | = Infrarot-Quarzthermometer             |
| Stimmfrequenzanalyse   | = Mikrotremor                           |
| Mimik                  | = Facial Action Coding System (FACS)    |



Buch S. 195

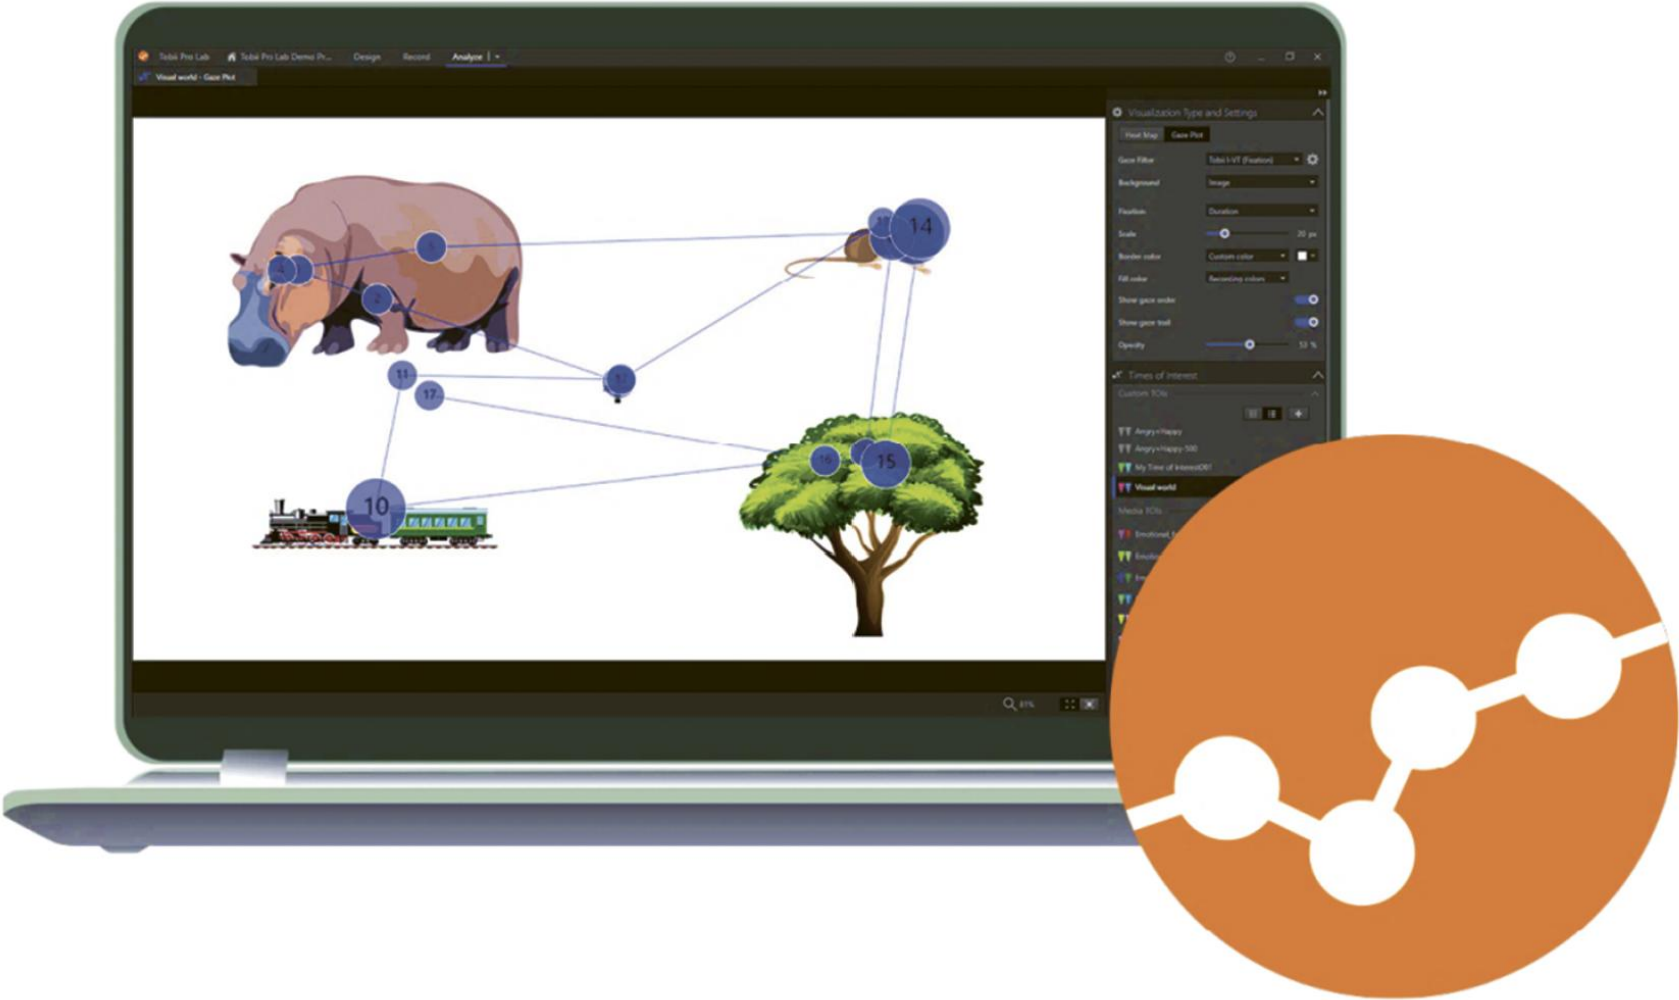

Abb. 59: Eye-Tracking Gaze-Plot einer Bildschirmbetrachtung (Quelle: Tobii 2020).

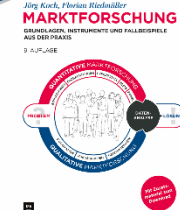

Buch S. 199

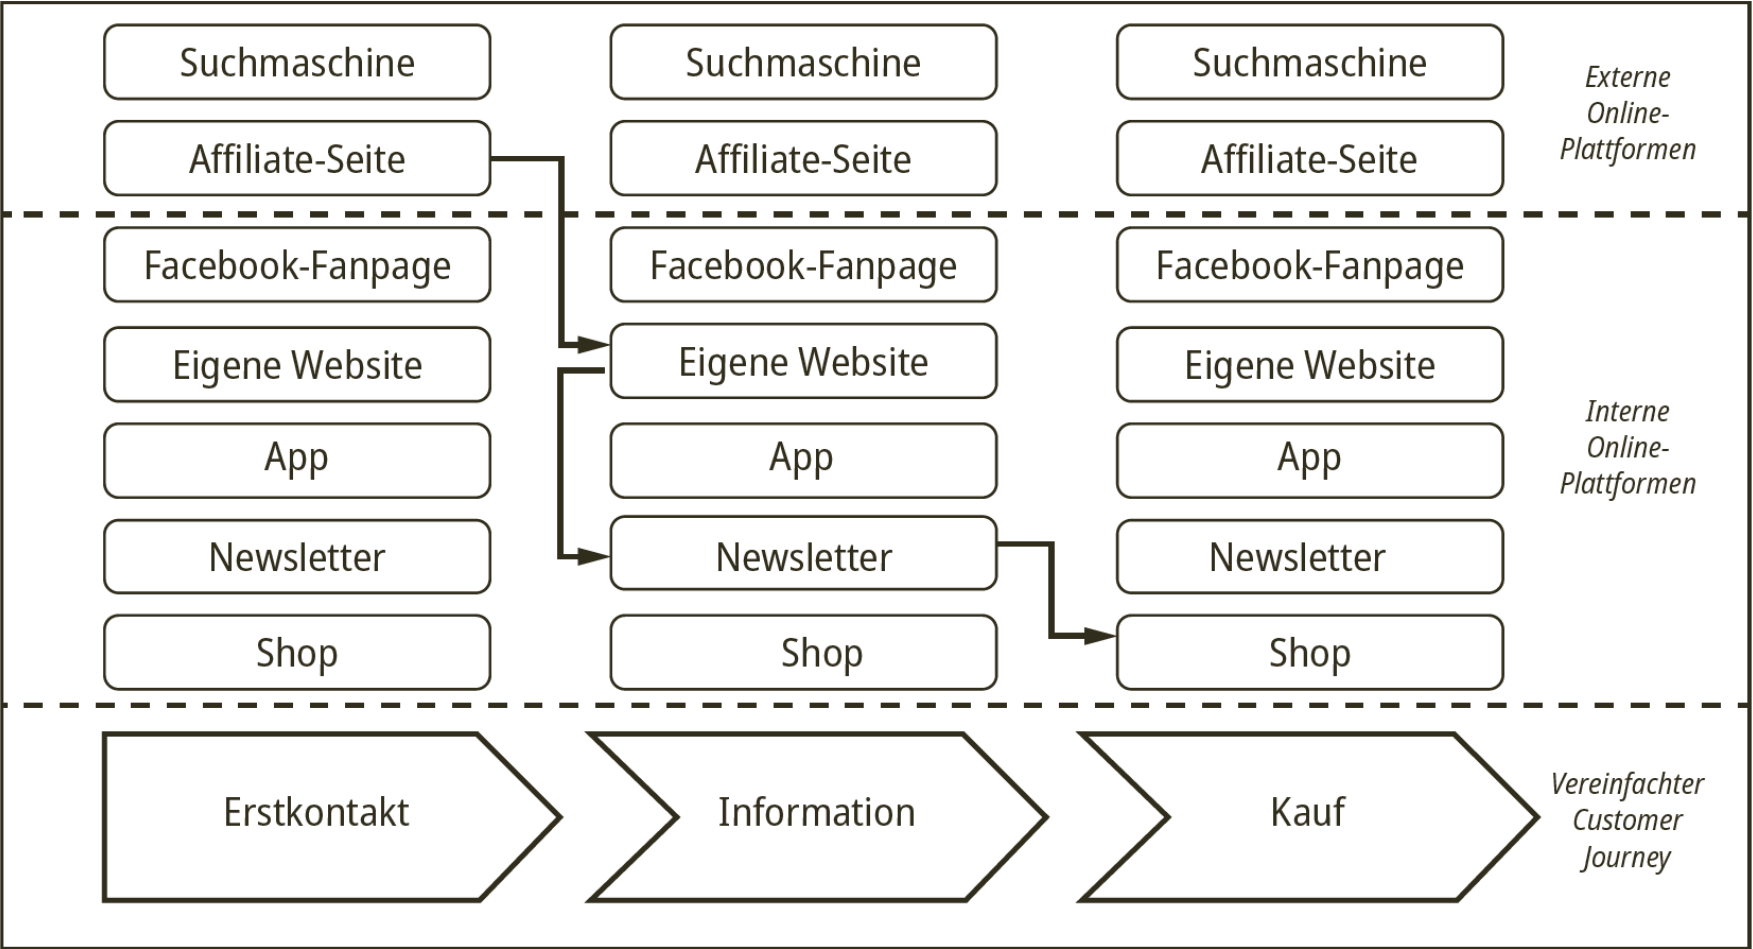

**Abb. 60:** Darstellung einer einfachen medieninternen Analyse zur Customer Journey (Quelle: Eigene Abbildung).



Buch S. 201

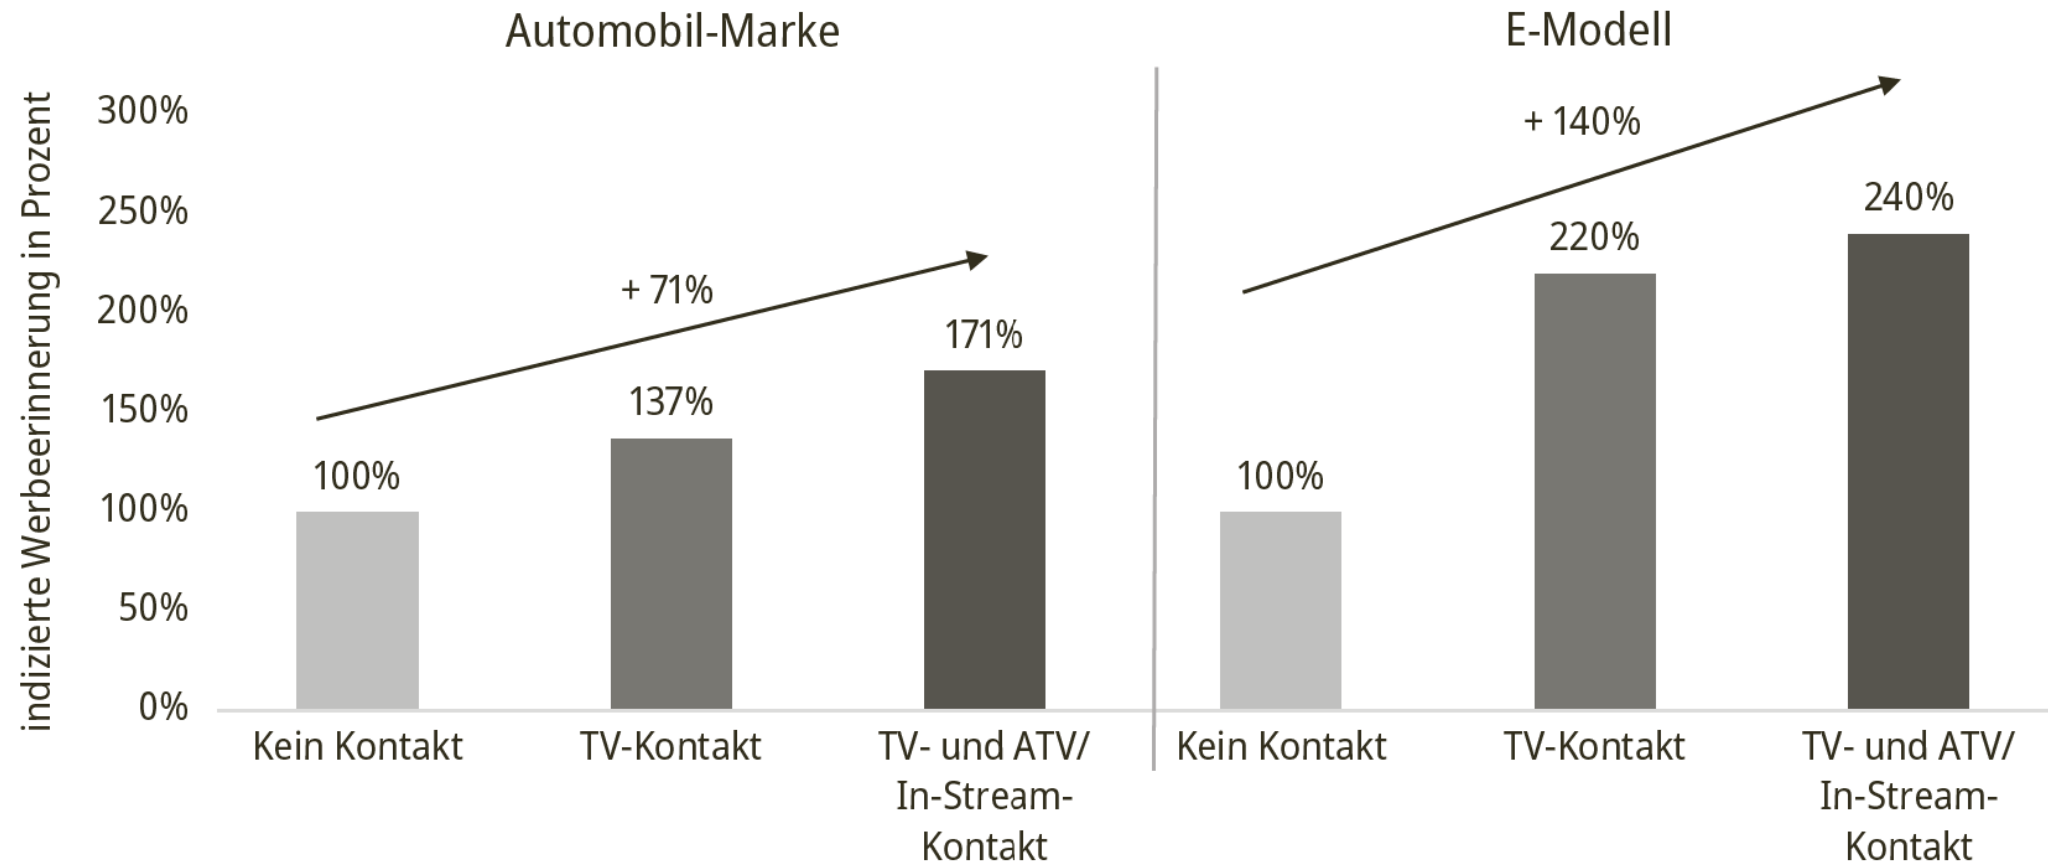

**Abb. 61:** Gestützte indizierte Werbeerinnerung an eine Automobilmarke und das beworbene E-Modell bei unterschiedlichen Werbekontaktformen (Quelle: Kaufmann/Reimann 2023, S. 12).



Buch S. 202

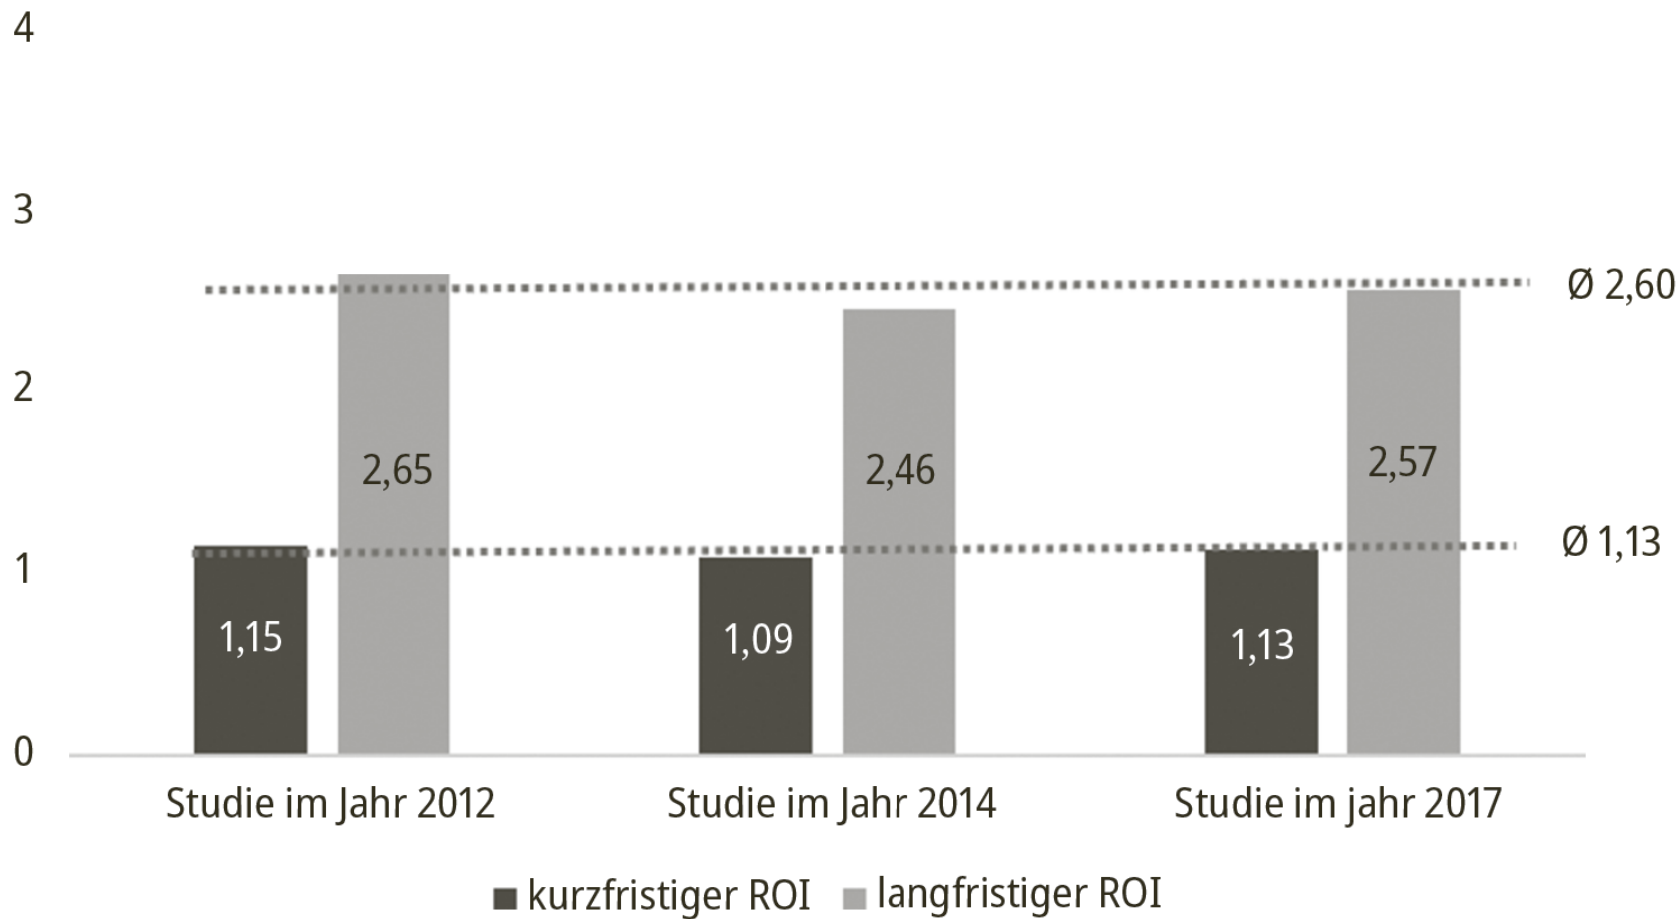

**Abb. 62:** Kurz- und langfristige ROI-Wirkung von TV-Werbung bei 318 analysierten Kampagnen in den Jahren 2012, 2014 und 2017 (Quelle: The global TV Group 2021, S. 25).





Buch S. 204

**Tab. 55:** Netto Werbeaufwendungen (in Mio. Euro) und Veränderung zum Vorjahr in % (Quelle: Zentralverband der Deutschen Werbewirtschaft 2023).

| Medium                    | 2023 (Mrd. Euro) | Veränd. |
|---------------------------|------------------|---------|
| Internet                  | 12.801           | + 8,3 % |
| Fernsehen                 | 5.083            | – 4,5 % |
| Tageszeitungen            | 1.566            | – 6,9 % |
| Fachzeitschriften         | 1.294            | – 4,5 % |
| Außenwerbung              | 1.202            | + 3,9 % |
| Anzeigeblätter            | 1.169            | + 3,9 % |
| Radio                     | 807              | – 0,7 % |
| Publikumszeitschriften    | 572              | – 9,6 % |
| Verzeichnismedien         | 253              | – 9,8 % |
| Wochen-/Sonntagszeitungen | 95               | – 7,4 % |
| Kino                      | 60               | +19,3 % |
| Gesamt                    | 25.869           | + 0,7 % |



Buch S. 206

Tab. 56: Struktur der Media-Analyse (Quelle: Arbeitsgemeinschaft Media Analyse 2024).

| MA Media Analyse           |                                                                                                                                                                                                                                                                                                                                                                                                                                                                                                                                                                                                                                                                                                                                                                                                                                                                                                                     |
|----------------------------|---------------------------------------------------------------------------------------------------------------------------------------------------------------------------------------------------------------------------------------------------------------------------------------------------------------------------------------------------------------------------------------------------------------------------------------------------------------------------------------------------------------------------------------------------------------------------------------------------------------------------------------------------------------------------------------------------------------------------------------------------------------------------------------------------------------------------------------------------------------------------------------------------------------------|
| Herausgeber                | Arbeitsgemeinschaft Media Analyse e. V., ein Zusammenschluss von Verlagen, Sendern, Werbeagenturen. Internetunternehmen und Werbungtreibenden                                                                                                                                                                                                                                                                                                                                                                                                                                                                                                                                                                                                                                                                                                                                                                       |
| Erfasste Medien            | National verbreitete Publikumszeitschriften und Wochenzeitungen, konfessionelle Zeitschriften (Konpress), Stadtilustrierte, überregionale und regionale Tageszeitungen, Zeitungssupplements, Lesezirkel, Außenwerbung/ Plakat, Kinobesuch, Radio/Webradio, Fernsehen, Online-Medien                                                                                                                                                                                                                                                                                                                                                                                                                                                                                                                                                                                                                                 |
| Sonstige Erhebungsmerkmale | Empfangsmöglichkeiten Fernsehen/Hörfunk, Freizeitverhalten, Reisen, Einkaufsverhalten, Haushaltsausstattung, Internet-Online-Nutzung, Soziodemographie                                                                                                                                                                                                                                                                                                                                                                                                                                                                                                                                                                                                                                                                                                                                                              |
| Grundgesamtheit            | Deutschsprachige Bevölkerung in Privathaushalten am Ort der Hauptwohnung in der Bundesrepublik Deutschland im Alter von 14 und mehr Jahren                                                                                                                                                                                                                                                                                                                                                                                                                                                                                                                                                                                                                                                                                                                                                                          |
| Stichprobe                 | Mehrstufige, systematische Zufallsauswahl aus dem Rufnummernbestand der Bundesnetzagentur (nur private, keine gewerbl. Nummern). Auswahlgrundlage ca. 120 Mio. Rufnummern.                                                                                                                                                                                                                                                                                                                                                                                                                                                                                                                                                                                                                                                                                                                                          |
| Berichte/Methoden          | Die Ergebnisse werden je nach Medium in verschiedenen Berichten niedergelegt:<br><b>Pressemedien I:</b> Publikumszeitschriften/Konpress; Befragung per computergest. Interview (Casi); ca. 40.000 Fälle; jeweils 2 Wellen<br><b>Pressemedien II:</b> Tageszeitungen/Supplements; Computer aided self interviewing (Casi); ca. 40.000 Fälle; jeweils 2 Wellen.<br><b>Hörfunk:</b> ca. 400 öffentl. und private Sender; Computer assisted Telephone interviewing (Cati); 67.000 Fälle; 2 Wellen<br><b>Plakat:</b> Großflächen, Mega- u. Citylight-Poster, Ganzsäulen; Cati-Interviews (Mobilität gestern) und Messung von Personen mit GPS-Empfänger über 7 Tage; 52.876 Fälle, in 2 Wellen<br><b>Online:</b> Internet-Angebote mit buchbaren Werbeflächen<br>3-Säulen-Modell: techn. Messung, On-Site-Befragung, Cati-Erhebung; Tech. Messung = Vollerhebung, On-Site = 400.000 Fälle, Cati = 10.500 Fälle pro Welle |
| Durchführende Institute    | Emnid, NIQ Medienforschung, Ifak, infratest, INRA, Media Markt-Analysen, Marplan und weitere (überschneidungsfreie Stichprobennetze)                                                                                                                                                                                                                                                                                                                                                                                                                                                                                                                                                                                                                                                                                                                                                                                |



Buch S. 207

**Tab. 57:** Struktur der AWA (Quelle: Institut für Demoskopie Allensbach 2024).

| AWA: Allensbacher Werbeträgeranalyse |                                                                                                                                                                                                                                                                                                                                                                                                                                                                                                                                                                       |
|--------------------------------------|-----------------------------------------------------------------------------------------------------------------------------------------------------------------------------------------------------------------------------------------------------------------------------------------------------------------------------------------------------------------------------------------------------------------------------------------------------------------------------------------------------------------------------------------------------------------------|
| Herausgeber                          | Institut für Demoskopie Allensbach                                                                                                                                                                                                                                                                                                                                                                                                                                                                                                                                    |
| Erfasste Medien                      | National verbreitete Publikumszeitschriften und Wochenzeitungen, Stadtilustrierte, Zeitungs-/Magazinsupplements, Kundenzeitschriften, überregionale und regionale Tageszeitungen, Anzeigenblätter, Kino, Hörfunk, Fernsehen, Plakat, Nahverkehrsmittel, Telefonbuch, Telefonkarte. Die Online-Medien werden im Detail in einer separaten Untersuchung (ACTA) erhoben                                                                                                                                                                                                  |
| Sonstige Erhebungsmerkmale           | Untersuchung in mehr als 2000 Märkten zu Kauf- u. Verbrauchsgewohnheiten und Markenbewußtsein. Politik und Gesellschaft, Einstellungen und Konsumverhalten, Interessen, Sport, Freizeit/Hobby, Kultur, Urlaub und Reisen, Geld- und Kapitalanlagen, Haus und Wohnen, Unterhaltungselektronik, Fotografie, Computer und Telekommunikation, Kraftfahrzeuge, Mode, Körperpflege und Kosmetik, Haushalt, Nahrungsmittel und Getränke, Tabakwaren, Gesundheit, Beruf, Einstellungen zur Werbung, zu Medien und zu Medieninhalten, Internet-Online-Nutzung, Soziodemografie |
| Grundgesamtheit                      | Deutschsprachige Wohnbevölkerung ab 14 Jahre                                                                                                                                                                                                                                                                                                                                                                                                                                                                                                                          |
| Stichprobe                           | Quotenauswahlverfahren, disproportionaler Stichprobenansatz zur Vergrößerung der Fallzahlen im Segment der 14- bis unter 60-jährigen, rund 23.000 Befragungen jährlich (2019)                                                                                                                                                                                                                                                                                                                                                                                         |
| Befragungstechnik                    | Face-to-face-Interviews in der Wohnung der Befragten                                                                                                                                                                                                                                                                                                                                                                                                                                                                                                                  |
| Durchführendes Institut              | IfD Allensbach                                                                                                                                                                                                                                                                                                                                                                                                                                                                                                                                                        |
| Berichterstattung                    | jährlich                                                                                                                                                                                                                                                                                                                                                                                                                                                                                                                                                              |
| Sonderform der AWA                   | „AWA First Class“: Teilstichprobe, Bevölkerung ab 14 Jahre im gesellschaftlich-wirtschaftlichen Status 1 (6,28 Mio. Personen ab 14 Jahre)                                                                                                                                                                                                                                                                                                                                                                                                                             |



Buch S. 208

**Tab. 58:** Struktur der b4p (Quelle: Gesellschaft für integrierte Kommunikationsforschung 2023).

| Best for Planning       |                                                                                                                                                                                                    |
|-------------------------|----------------------------------------------------------------------------------------------------------------------------------------------------------------------------------------------------|
| Herausgeber             | Verlage: A. Springer, Bauer, Funke, Gruner & Jahr, Burda                                                                                                                                           |
| Grundgesamtheit         | Deutschsprachige Wohnbevölkerung in Privathaushalten ab 14 Jahre                                                                                                                                   |
| Art der Stichprobe      | 30.000 Fälle at random ausgewählt. Stichprobenziehung nach dem ADM-Stichprobensystem (mehrstufig) auf der Basis einer Flächenstichprobe.                                                           |
| Untersuchungsgegenstand | Besitz- und Konsumdaten für 2.400 Marken aus 107 Produktbereichen/Anschaffungsabsichten/Freizeitinteressen/Einstellungen zur sozialen Umwelt/Reichweiten und Strukturen der genutzten Werbeträger. |
| Einbezogene Medien      | Publikumszeitschriften, Supplements, regionale und überregionale Tageszeitungen, TV, Radio, Plakat, Kino, Mobile (181 Apps), Social Media (ca. 734 Websites).                                      |
| Besonderheiten          | Über 150 Statements zu Einstellungen werden verdichtet zu wichtigen Zielgruppenmodellen und Typen (Sinus, Sigma usw.).<br>Technisch gemessene Online- und Mobile-Nutzung                           |



Buch S. 212

Tab. 59: Struktur des AGF/NIQ-Panels (Quelle: AGF 2024).

| AGF/NIQ-Panel              |                                                                                                                                                                                                                                                                                                        |
|----------------------------|--------------------------------------------------------------------------------------------------------------------------------------------------------------------------------------------------------------------------------------------------------------------------------------------------------|
| Herausgeber                | AGF Arbeitsgemeinschaft Videoforschung, ein Zusammenschluss der Sender ARD, ZDF, RTL-Gruppe, Pro 7 SAT 1-Media, Sky, tele5, Viacom, N 24 und von Werbeagenturen und Werbetreibenden.                                                                                                                   |
| Medien                     | Erfassung: Alle im Gebiet der Bundesrepublik empfangbaren Fernsehsender (= ca. 300 identifizierbare Sender)<br>Aktuelle Auswertung: 9 private, 2 öffentl. und 9 ARD- Regionalsender.<br>Alle Daten gehen in die Fusion mit der MA.                                                                     |
| Sonstige Erhebungsmerkmale | Technische Ausstattung, Beliebtheit der Sendergenres, Freizeitbeschäftigungen, Urlaubsverhalten, Heimcomputer/PC, Konsum (Verwendungshäufigkeiten nach Produktgruppen), Soziodemografie.<br>Schriftliche Erhebungen einmal jährlich, Übertragung in die Auswertungsprogramme zur Zielgruppenbestimmung |
| Grundgesamtheit            | Ab 2016 deutschsprachige Bevölkerung in privaten Haushalten mit mind. 1 TV-Gerät oder einem streamingfähigen Device.                                                                                                                                                                                   |
| Stichprobe                 | Panel mit 5.400 Haushalten, die repräsentativ für 38,7 Mio. TV-Haushalte stehen.<br>Ab 2024 repräsentativ für 40,5 Mio. Bewegtbild-Haushalte.                                                                                                                                                          |
| Erhebungstechnik           | Mit der Messtechnik „TC UMX“ wird sekundengenau protokolliert, welche Programme am TV-Gerät oder über Zusatzgeräte (z. B. Videorecorder; DVD-Player) realtime oder zeitversetzt gesehen werden.<br>Video-Streaming, wenn eine Videodatei mit Werbung über einen Recorder abgespielt wird.              |
| Durchführendes Institut    | NIQ, Ankordata, AGF-Scape, DAP                                                                                                                                                                                                                                                                         |
| Berichterstattung          | Tägliche Berichterstattung der Daten des Vortages, Einspeisung in die vorhandenen PC-Auswertungsprogramme, nationale Berichterstattung in der Datei „ma media plus“                                                                                                                                    |
| Desktop PC/Laptop          | Für die Messung der Bewegtbildnutzung auf Desktop PCs und Laptops existiert ein 15.000er Panel in Zusammenarbeit mit Nielsen                                                                                                                                                                           |



Buch S. 220

**Tab. 60:** Häufigkeitstabelle zur Frage „Welche Sportart bevorzugen Sie?“ (Quelle: SPSS-Datensatz „Sportschuh Panel“ – Variable 1).

|                 | Häufigkeit | Prozent | Kumulierte Prozente |
|-----------------|------------|---------|---------------------|
| Running         | 8          | 26,7    | 26,7                |
| Indoor Training | 6          | 20,0    | 46,7                |
| Fußball         | 6          | 20,0    | 66,7                |
| Basketball      | 4          | 13,3    | 80,0                |
| Handball        | 3          | 10,0    | 90,0                |
| Tennis          | 2          | 6,7     | 96,7                |
| Sonstiges       | 1          | 3,3     | 100,0               |
| Gesamt          | 30         | 100,0   |                     |



Buch S. 221

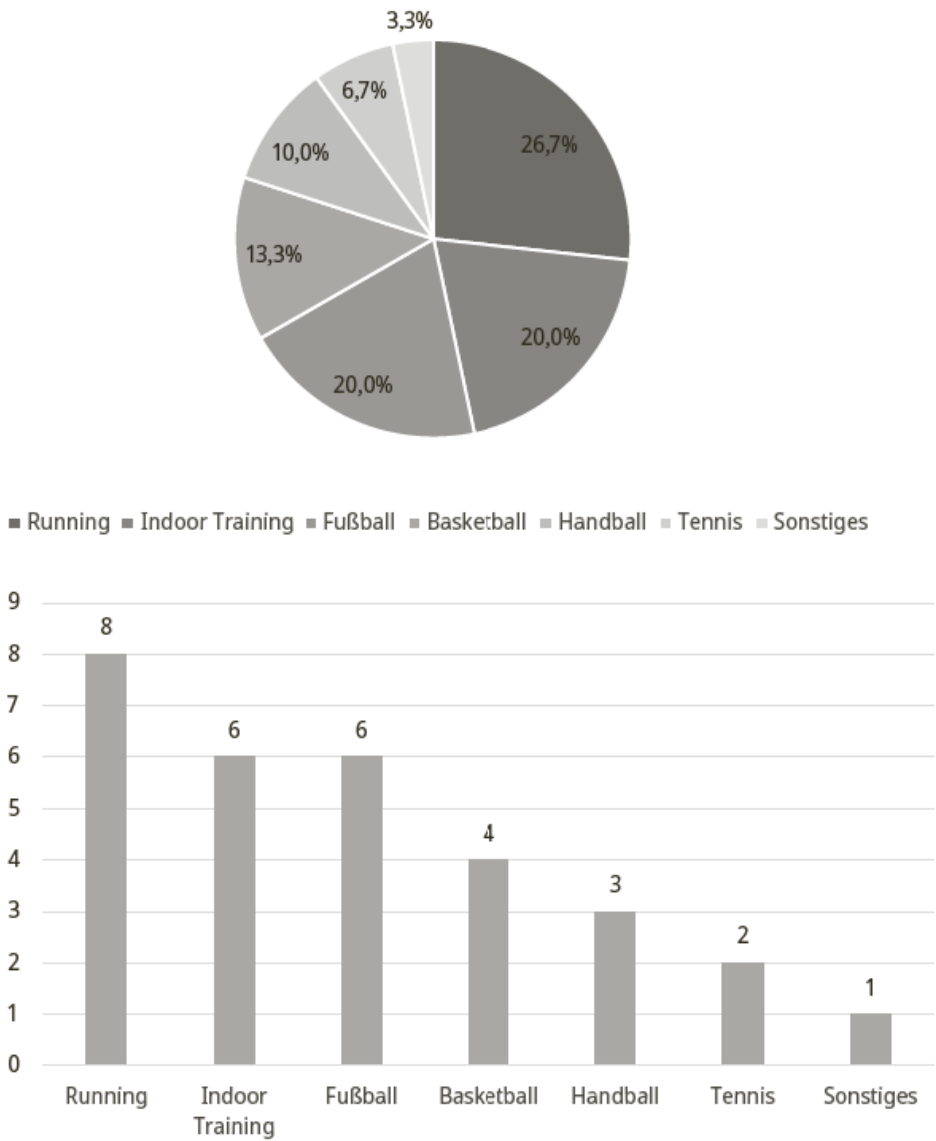

**Abb. 63:** Kreis- und Balkendiagramm zur Frage „Welche Sportart bevorzugen Sie?“ (Quelle: SPSS-Datensatz „Sportschuh Panel“ – Variable 1).



Buch S. 223

**Tab. 61:** Lage- und Streuungsparameter zu den Fragen „Alter“ und „Sportschuh Besitz“ (Quelle: SPSS-Datensatz „Sportschuh Panel“ – Variable 9 und 15).

|                 |         | Wie alt sind Sie? | Wie viele Paar Sportschuhe besitzen Sie? |
|-----------------|---------|-------------------|------------------------------------------|
| N               | Gültig  | 30                | 29                                       |
|                 | Fehlend | 0                 | 1                                        |
| Mittelwert      |         | 38,00             | 3,97                                     |
| Median          |         | 37,50             | 4,00                                     |
| Modus           |         | 34                | 5                                        |
| Std.-Abweichung |         | 13,560            | 2,044                                    |
| Varianz         |         | 183,862           | 4,177                                    |
| Spannweite      |         | 48                | 9                                        |





Buch S. 224

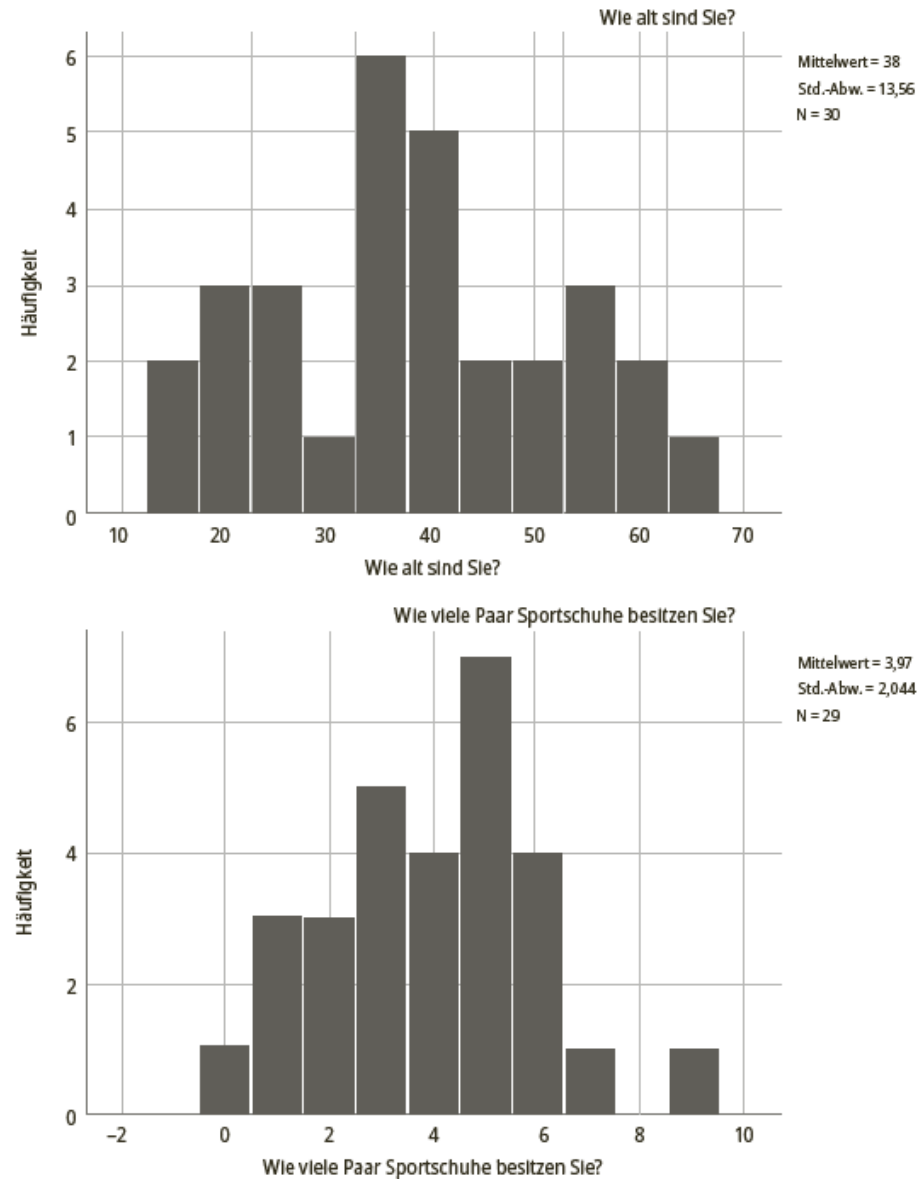

Abb. 64: Häufigkeitsverteilung zu den Fragen „Alter“ (gruppiert) und „Sportschuh Besitz“  
(Quelle: SPSS-Datensatz „Sportschuh Panel“ – Variable 9 und 15).



Buch S. 226

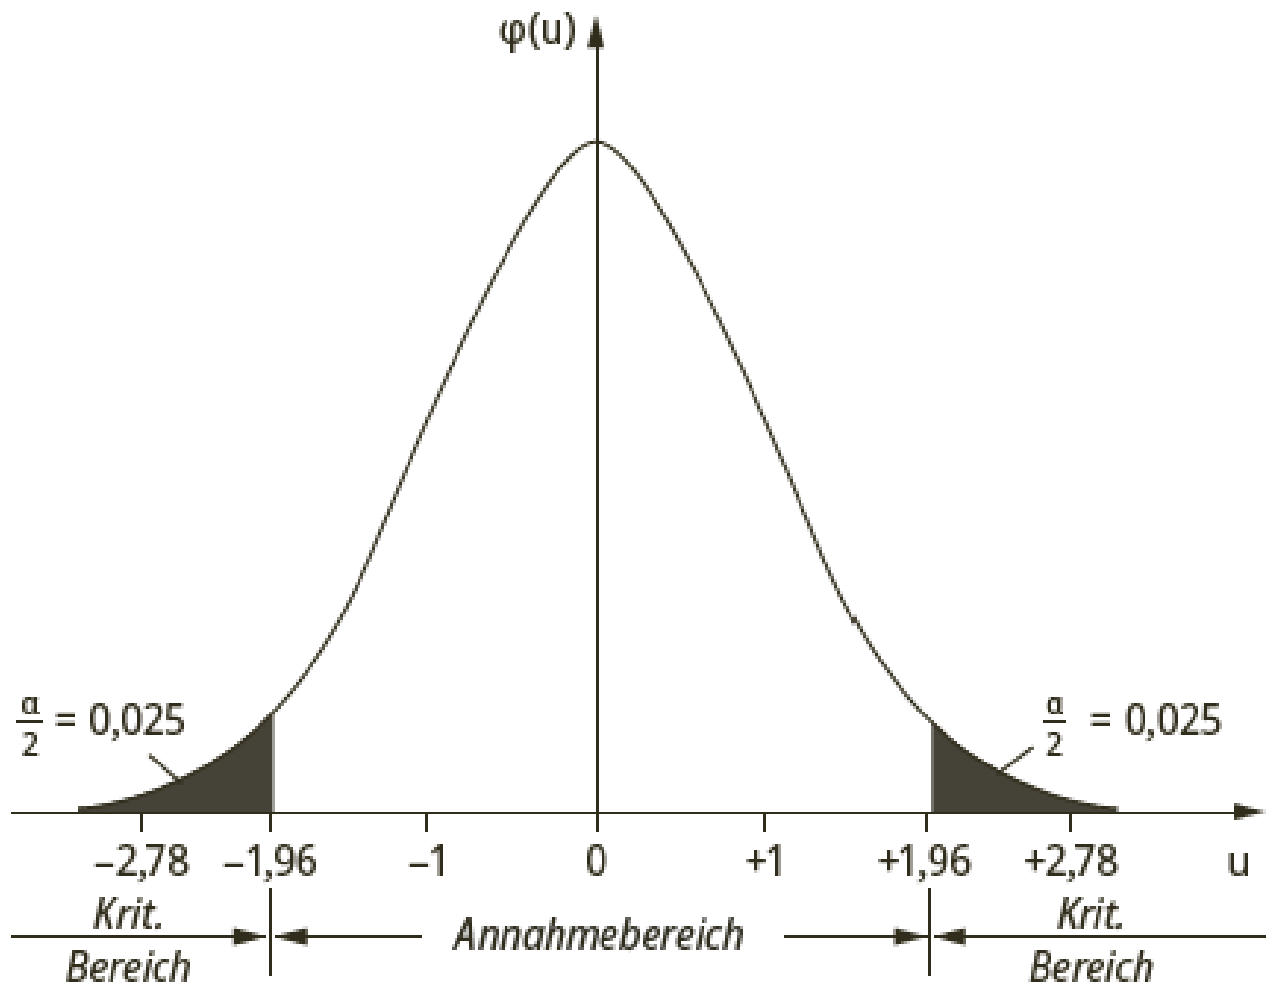

**Abb. 65:** Prüffunktion mit zweiseitigem Annahmebereich (Quelle: Clauss/Ebner 1972, S. 175).



Buch S. 226

**Tab. 62:**  $\alpha$ - und  $\beta$ -Fehler bei statistischen Entscheidungen (Quelle: Clauss/Ebner 1972, S. 178).

| Entscheidung aufgrund des<br>Stichprobenwerts | In der Grundgesamtheit gilt: |                       |
|-----------------------------------------------|------------------------------|-----------------------|
|                                               | $H_0$ trifft zu              | $H_0$ trifft nicht zu |
| $H_0$ wird angenommen                         | Richtige Entscheidung        | $\beta$ -Fehler       |
| $H_0$ wird abgelehnt                          | $\alpha$ -Fehler             | Richtige Entscheidung |



Buch S. 227

**Tab. 63:** Kreuztabelle der Variablen „Geschlecht“ und „Mitgliedschaft Fitnessstudio“ (Quelle: SPSS-Datensatz „Sportschuh Panel“ – Variable 14 und 16).

|            |          |                            | Sind Sie Mitglied in einem Fitnessstudio? |        | Gesamt  |
|------------|----------|----------------------------|-------------------------------------------|--------|---------|
|            |          |                            | Ja                                        | Nein   |         |
| Geschlecht | Männlich | Anzahl                     | 3                                         | 11     | 14      |
|            |          | % innerhalb von Geschlecht | 21,4 %                                    | 78,6 % | 100,0 % |
|            | Weiblich | Anzahl                     | 10                                        | 6      | 16      |
|            |          | % innerhalb von Geschlecht | 62,5 %                                    | 37,5 % | 100,0 % |
| Gesamt     |          | Anzahl                     | 13                                        | 17     | 30      |
|            |          | % innerhalb von Geschlecht | 43,3 %                                    | 56,7 % | 100,0 % |



Buch S. 228

**Tab. 64:** Echte und zufällige Merkmalsverteilung „Geschlecht“ und „Mitgliedschaft Fitnessstudio“ (Quelle: SPSS-Datensatz „Sportschuh Panel“ – Variable 14 und 16).

|            |                  |                  | Sind Sie Mitglied in einem Fitnessstudio? |      | Gesamt |
|------------|------------------|------------------|-------------------------------------------|------|--------|
|            |                  |                  | Ja                                        | Nein |        |
| Geschlecht | Männlich         | Anzahl           | 3                                         | 11   | 14     |
|            |                  | Erwartete Anzahl | 6,1                                       | 7,9  | 14,0   |
|            | Weiblich         | Anzahl           | 10                                        | 6    | 16     |
|            |                  | Erwartete Anzahl | 6,9                                       | 9,1  | 16,0   |
| Gesamt     | Anzahl           |                  | 13                                        | 17   | 30     |
|            | Erwartete Anzahl |                  | 13,0                                      | 17,0 | 30,0   |



Buch S. 229

Die  $\chi^2$ -Verteilung. Irrtumswahrscheinlichkeit  $\alpha$  (in %)

| $f$ | 99,0   | 97,5   | 95     | 90    | $\alpha$ | 50   | 30   | 10   | 5    | 2,5  | 1    |
|-----|--------|--------|--------|-------|----------|------|------|------|------|------|------|
| 1   | ,03157 | ,03982 | ,02393 | ,0158 | ,148     | ,455 | 1,07 | 2,71 | 3,84 | 5,02 | 6,64 |
| 2   | ,0201  | ,0506  | ,103   | ,211  | ,713     | 1,39 | 2,41 | 4,61 | 5,99 | 7,38 | 9,21 |
| 3   | ,115   | ,216   | ,352   | ,584  | 1,42     | 2,37 | 3,67 | 6,25 | 7,81 | 9,35 | 11,3 |
| 4   | ,297   | ,484   | ,711   | 1,06  | 2,19     | 3,36 | 4,88 | 7,78 | 9,49 | 11,1 | 13,3 |
| 5   | ,554   | ,831   | 1,15   | 1,61  | 3,00     | 4,35 | 6,06 | 9,24 | 11,1 | 12,8 | 15,1 |
| 6   | ,872   | 1,24   | 1,64   | 2,20  | 3,83     | 5,35 | 7,23 | 10,6 | 12,6 | 14,4 | 16,8 |
| 7   | 1,24   | 1,69   | 2,17   | 2,83  | 4,67     | 6,35 | 8,38 | 12,0 | 14,1 | 16,0 | 18,5 |
| 8   | 1,65   | 2,18   | 2,73   | 3,49  | 5,53     | 7,34 | 9,52 | 13,4 | 15,5 | 17,5 | 20,1 |
| 9   | 2,09   | 2,70   | 3,33   | 4,17  | 6,39     | 8,34 | 10,7 | 14,7 | 16,9 | 19,0 | 21,7 |
| 10  | 2,56   | 3,25   | 3,94   | 4,87  | 7,27     | 9,34 | 11,8 | 16,0 | 18,3 | 20,5 | 23,2 |
| 11  | 3,05   | 3,82   | 4,57   | 5,58  | 8,15     | 10,3 | 12,9 | 17,3 | 19,7 | 21,9 | 24,7 |
| 12  | 3,57   | 4,40   | 5,23   | 6,30  | 9,03     | 11,3 | 14,0 | 18,5 | 21,0 | 23,3 | 26,2 |
| 13  | 4,11   | 5,01   | 5,89   | 7,04  | 9,93     | 12,3 | 15,1 | 19,8 | 22,4 | 24,7 | 27,7 |
| 14  | 4,66   | 5,63   | 6,57   | 7,79  | 10,8     | 13,3 | 16,2 | 21,1 | 23,7 | 26,1 | 29,1 |
| 15  | 5,23   | 6,26   | 7,26   | 8,55  | 11,7     | 14,3 | 17,3 | 22,3 | 25,0 | 27,5 | 30,6 |
| 16  | 5,81   | 6,91   | 7,96   | 9,31  | 12,6     | 15,3 | 18,4 | 23,5 | 26,3 | 28,8 | 32,0 |
| 17  | 6,41   | 7,56   | 8,67   | 10,1  | 13,5     | 16,3 | 19,5 | 24,8 | 27,6 | 30,2 | 33,4 |
| 18  | 7,01   | 8,23   | 9,39   | 10,9  | 14,4     | 17,3 | 20,6 | 26,0 | 28,9 | 31,5 | 34,8 |
| 19  | 7,63   | 8,91   | 10,1   | 11,7  | 15,4     | 18,3 | 21,7 | 27,2 | 30,1 | 32,9 | 36,2 |
| 20  | 8,26   | 9,59   | 10,9   | 12,4  | 16,3     | 19,3 | 22,8 | 28,4 | 31,4 | 34,2 | 37,6 |
| 21  | 8,90   | 10,3   | 11,6   | 13,2  | 17,2     | 20,3 | 23,9 | 29,6 | 32,7 | 35,5 | 38,9 |
| 22  | 9,54   | 11,0   | 12,3   | 14,0  | 18,1     | 21,3 | 24,9 | 30,8 | 33,9 | 36,8 | 40,3 |
| 23  | 10,2   | 11,7   | 13,1   | 14,8  | 19,0     | 22,3 | 26,0 | 32,0 | 35,2 | 38,1 | 41,6 |
| 24  | 10,9   | 12,4   | 13,8   | 15,7  | 19,9     | 23,3 | 27,1 | 33,2 | 36,4 | 39,4 | 43,0 |
| 25  | 11,5   | 13,1   | 14,6   | 16,5  | 20,9     | 24,3 | 28,2 | 34,4 | 37,7 | 40,6 | 44,3 |
| 26  | 12,2   | 13,8   | 15,4   | 17,3  | 21,8     | 25,3 | 29,2 | 35,6 | 38,9 | 41,9 | 45,6 |
| 27  | 12,9   | 14,6   | 16,2   | 18,1  | 22,7     | 26,3 | 30,3 | 36,7 | 40,1 | 43,2 | 47,0 |
| 28  | 13,6   | 15,3   | 16,9   | 18,9  | 23,6     | 27,3 | 31,4 | 37,9 | 41,3 | 44,5 | 48,3 |
| 29  | 14,3   | 16,0   | 17,7   | 19,8  | 24,6     | 28,3 | 32,5 | 39,1 | 42,6 | 45,7 | 49,6 |

Abb. 66:  $\chi^2$  Verteilung bei vorgegebenen Freiheitsgraden und Irrtumswahrscheinlichkeiten (Quelle: Clauss/Ebner 1972, S. 344).



Buch S. 230

**Tab. 65:** Beispiel für unterschiedliche Streuungsverhältnisse innerhalb und zwischen Gruppen (Quelle: Eigene Abbildung).

|               | Verteilung A                                                               | $\bar{x}$ | Verteilung B                                | $\bar{x}$ | Verteilung C                                                                | $\bar{x}$ |
|---------------|----------------------------------------------------------------------------|-----------|---------------------------------------------|-----------|-----------------------------------------------------------------------------|-----------|
| Gruppe 1      | 2 2 2 2 2                                                                  | 2         | 1 1 1 2 5                                   | 2         | 2 6 4 2 6                                                                   | 4         |
| Gruppe 2      | 4 4 4 4 4                                                                  | 4         | 2 3 4 5 6                                   | 4         | 2 6 4 2 6                                                                   | 4         |
| Gruppe 3      | 6 6 6 6 6                                                                  | 6         | 3 6 7 7 7                                   | 6         | 2 6 4 2 6                                                                   | 4         |
| <b>Gesamt</b> |                                                                            | <b>4</b>  |                                             | <b>4</b>  |                                                                             | <b>4</b>  |
| Einschätzung  | Keine Streuung innerhalb der Gruppe.<br>Hohe Streuung zwischen den Gruppen |           | Streuung innerhalb und zwischen den Gruppen |           | Hohe Streuung innerhalb der Gruppen.<br>Keine Streuung zwischen den Gruppen |           |



Buch S. 231

**Tab. 66:** Gesamt-, erklärte und nicht-erklärte Abweichung zur Verteilung B aus Tabelle 65 (Quelle: Eigene Abbildung).

| Ansatz     | Gesamtabweichung                                                                    | = Erklärte Abweichung                                                                | + Nicht-erklärte Abweichung                                                          |
|------------|-------------------------------------------------------------------------------------|--------------------------------------------------------------------------------------|--------------------------------------------------------------------------------------|
| Kenngroßen | Summe der quadrierten Gesamtabweichungen zwischen dem Einzelwert und dem Mittelwert | Summe der quadrierten Abweichungen zwischen dem Gruppenmittelwert und dem Mittelwert | Summe der quadrierten Abweichungen zwischen dem Einzelwert und dem Gruppenmittelwert |
| Formel     | $SS_t = \sum \sum (x_{ij} - \bar{x})^2$                                             | $SS_e = \sum J(\bar{x}_j' - \bar{x})^2$                                              | $SS_{ne} = \sum \sum (x_{ij} - \bar{x}_j')^2$                                        |
| Beispiel   | Person 1 in Gruppe 1:<br>$(1 - 4)^2 = 9$                                            | Person 1 in Gruppe 1:<br>$(2 - 4)^2 = 4$                                             | Person 1 in Gruppe 1:<br>$(1 - 2)^2 = 1$                                             |
| Gesamtwert | $SS_t = 74$                                                                         | $SS_e = 40$                                                                          | $SS_{ne} = 34$                                                                       |





Buch S. 232

**Tab. 67:** Berechnung von Freiheitsgraden, mittlerer quadratischer Abweichung und F-Wert (Quelle: Eigene Abbildung).

| Ausgangswert                   | $SS_t = 74$             | $SS_e = 40$            | $SS_{ne} = 34$                      |
|--------------------------------|-------------------------|------------------------|-------------------------------------|
| Freiheitsgrad                  | $f(SS_t) = n - 1$       | $f(SS_e) = g - 1$      | $f(SS_{ne}) = g \cdot (n_g - 1)$    |
| Berechnung                     | $f(SS_t) = 15 - 1 = 14$ | $f(SS_e) = 3 - 1 = 2$  | $f(SS_{ne}) = 3 \cdot (5 - 1) = 12$ |
| Mittlere quadrierte Abweichung |                         | $MS_e = 20$            | $MS_{ne} = 2,83$                    |
| F-Wert = $MS_e / MS_{ne}$      |                         | $F = 20 / 2,83 = 7,07$ |                                     |



**Tab. 68:** Ergebnis einer Varianzanalyse in SPSS zum Unterschied des Besitzes von Sportschuhen  
(Quelle: SPSS-Datensatz „Sportschuh Panel“ – Variable 9 und 14).

| Wie viele Paar Sportschuhe besitzen Sie? |    |            |                 |         |         |
|------------------------------------------|----|------------|-----------------|---------|---------|
|                                          | N  | Mittelwert | Std.-Abweichung | Minimum | Maximum |
| Fitnessstudio Mitglied                   | 13 | 5,54       | 1,450           | 3       | 9       |
| Kein Fitnessstudio Mitglied              | 16 | 2,69       | 1,493           | 0       | 5       |
| Gesamt                                   | 29 | 3,97       | 2,044           | 0       | 9       |

| Einfaktorielle ANOVA  |              |    |                     |        |             |
|-----------------------|--------------|----|---------------------|--------|-------------|
|                       | Quadratsumme | df | Mittel der Quadrate | F      | Signifikanz |
| Zwischen den Gruppen  | 58,297       | 1  | 58,297              | 26,829 | 0,000       |
| Innerhalb der Gruppen | 58,668       | 27 | 2,173               |        |             |
| Gesamt                | 116,966      | 28 |                     |        |             |



Buch S. 234

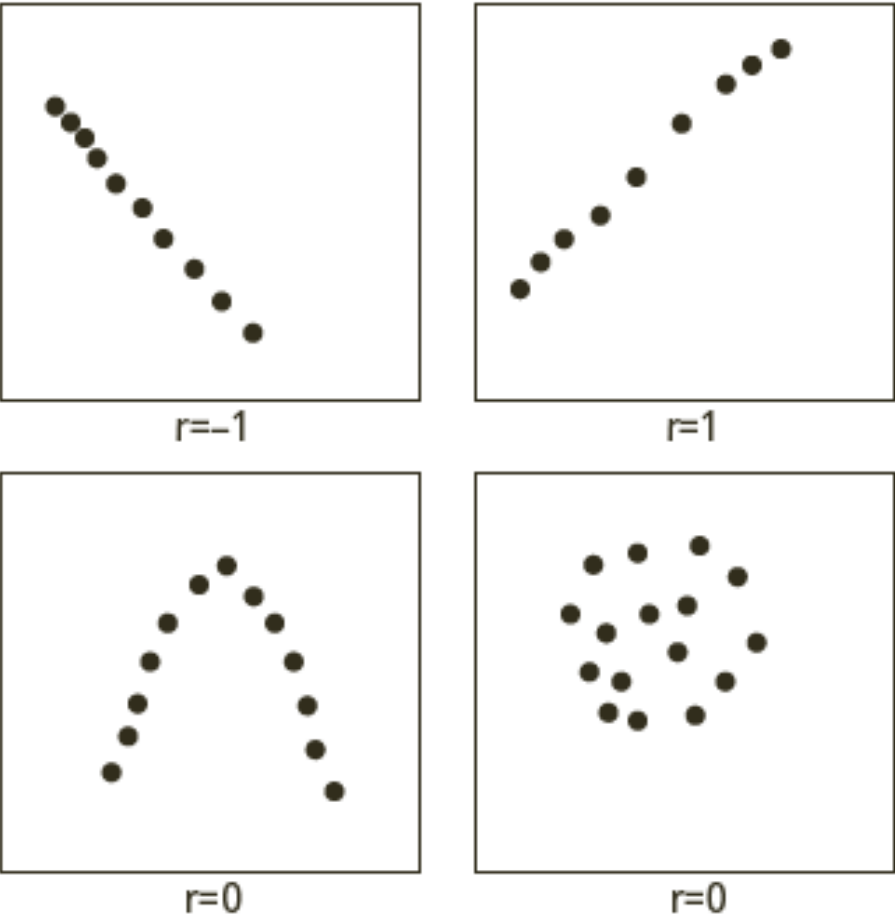

**Abb. 67:** Ausprägungen von Korrelationen (Streudiagramme) (Quelle: Berekoven/Eckert/ Ellenrieder 2009, S. 195).



Buch S. 235

**Tab. 69:** Lage- und Streuparameter der Variablen „Einkommen“ und „Ausgaben pro Sportschuh“ (Quelle: SPSS-Datensatz „Sportschuh Panel“ – Variable 10 und 17).

|                 |         | Wie hoch ist Ihr jährliches<br>persönliches Nettoeinkommen? | Wie viel geben Sie im Durchschnitt<br>für ein Paar Sportschuhe aus? |
|-----------------|---------|-------------------------------------------------------------|---------------------------------------------------------------------|
| N               | Gültig  | 30                                                          | 30                                                                  |
|                 | Fehlend | 0                                                           | 0                                                                   |
| Mittelwert      |         | 22.550,00                                                   | 76,17                                                               |
| Median          |         | 23.250,00                                                   | 77,50                                                               |
| Modus           |         | 0 <sup>a</sup>                                              | 55 <sup>a</sup>                                                     |
| Std.-Abweichung |         | 14.730,539                                                  | 35,795                                                              |
| Minimum         |         | 0                                                           | 20                                                                  |
| Maximum         |         | 60.000                                                      | 165                                                                 |

<sup>a</sup>Mehrere Modi vorhanden. Der kleinste Wert wird angezeigt.



Buch S. 235

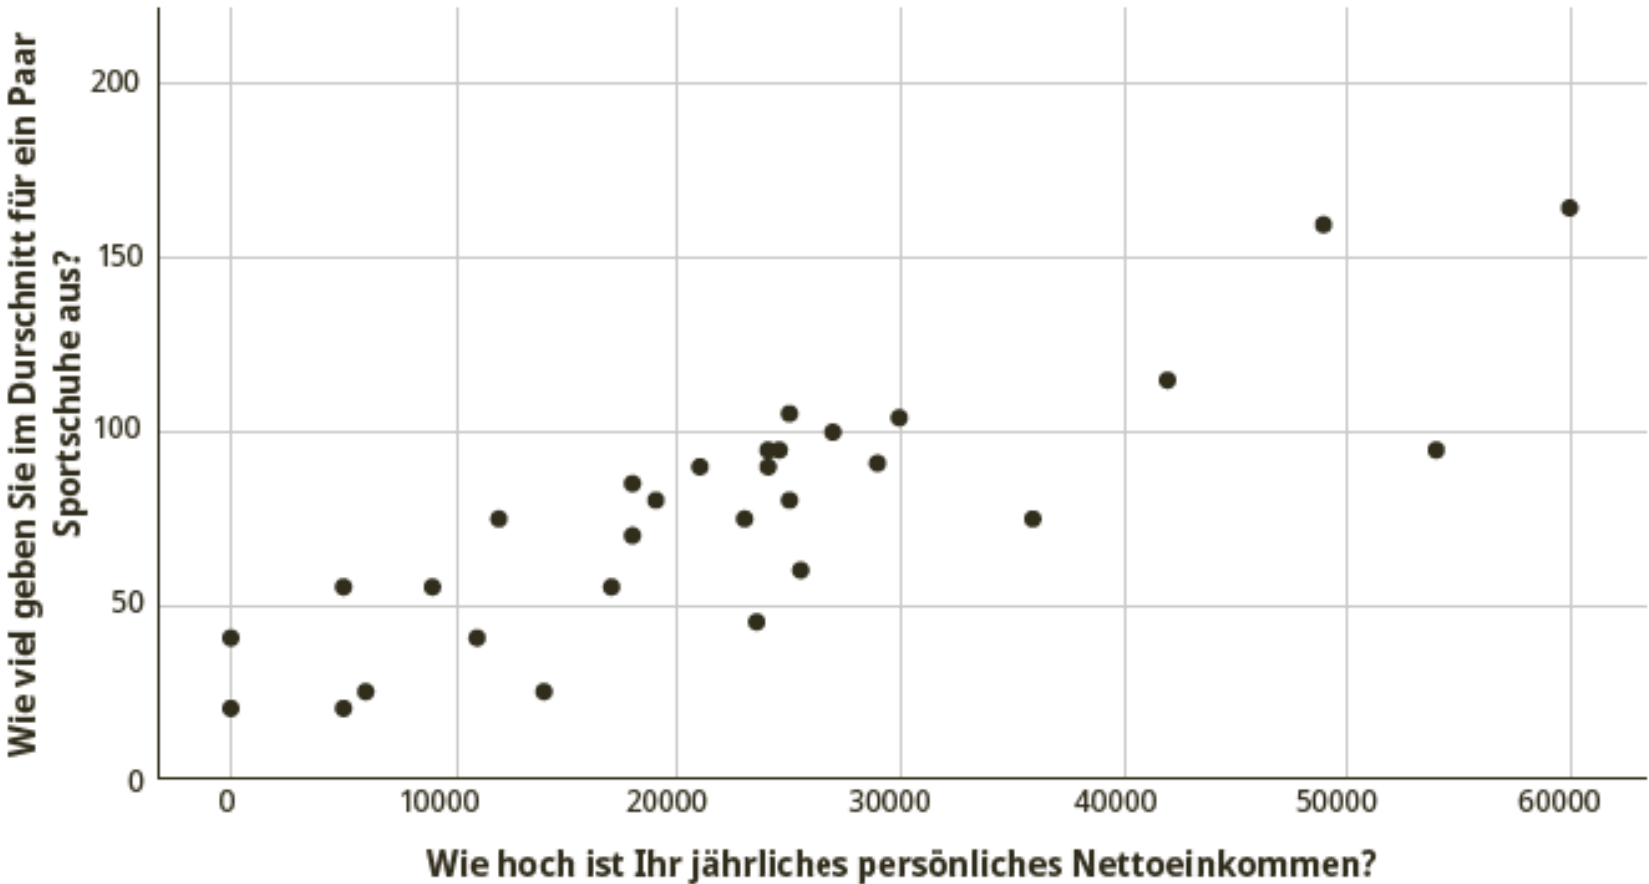

**Abb. 68:** Streudiagramm zur Darstellung der Korrelation Nettoeinkommen und Ausgaben  
(Quelle: SPSS-Datensatz „Sportschuh Panel“ – Variable 10 und 17).



Buch S. 236

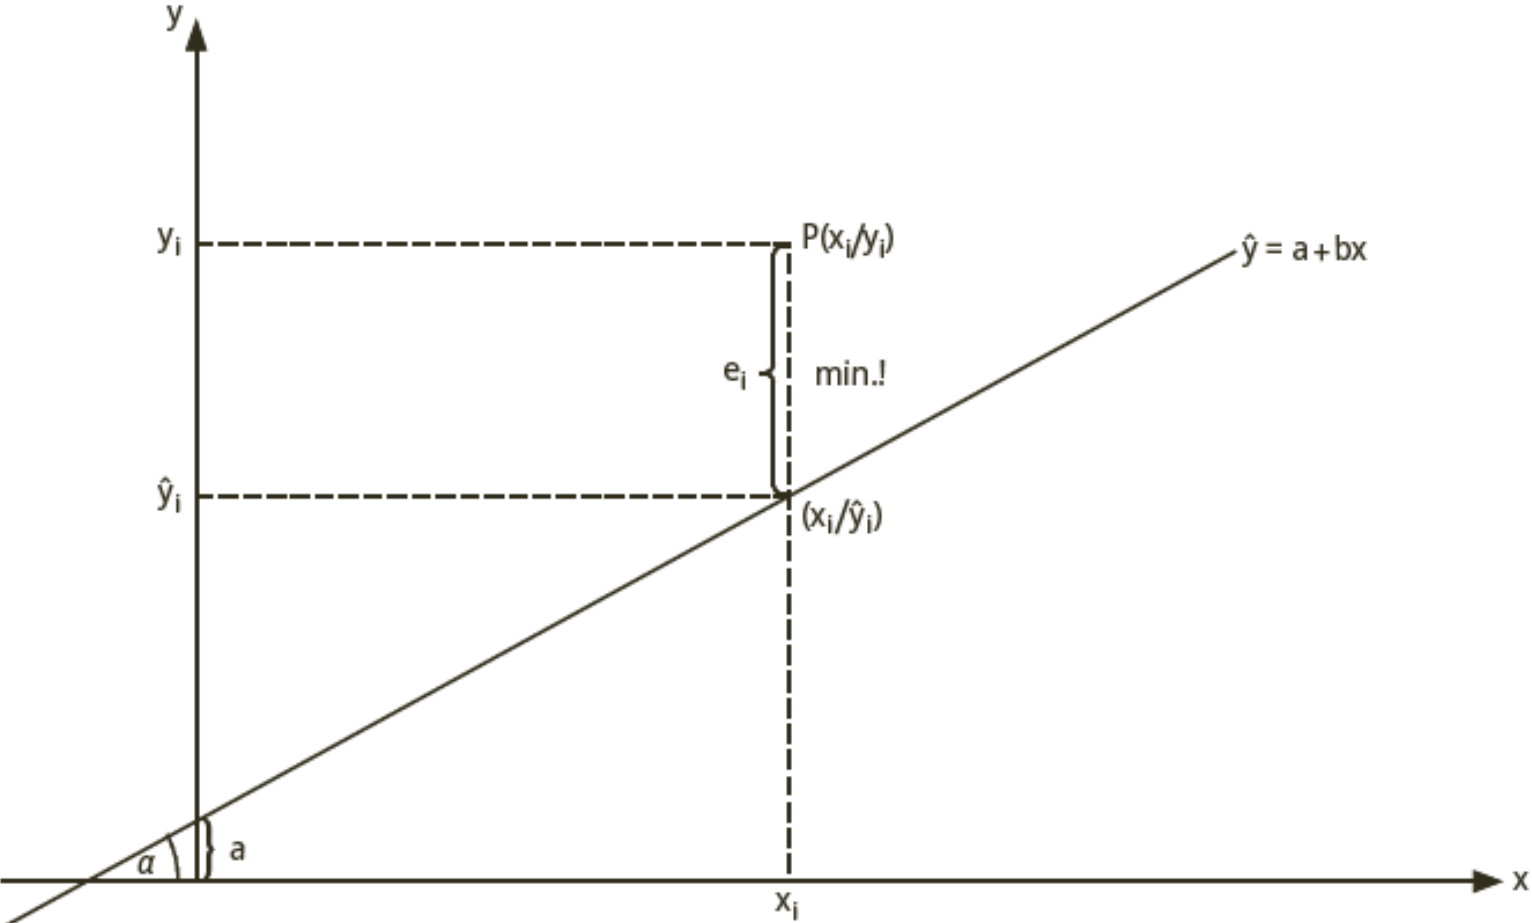

**Abb. 69:** Grafische Darstellung einer linearen Regressionsfunktion (Quelle: Eigene Abbildung).



Buch S. 237

**Tab. 70:** Arbeitstabelle mit Werten von fünf Probanden zur Ermittlung einer Regressionsgeraden (Quelle: Eigene Abbildung).

|          | $x$             | $y$            | $xy$       | $x^2$      | $y^2$      |
|----------|-----------------|----------------|------------|------------|------------|
| Person 1 | 5               | 8              | 40         | 25         | 64         |
| Person 2 | 4               | 9              | 36         | 16         | 81         |
| Person 3 | 4               | 10             | 40         | 16         | 100        |
| Person 4 | 6               | 13             | 78         | 36         | 169        |
| Person 5 | 8               | 15             | 120        | 64         | 225        |
| Summe    | <b>27</b>       | <b>55</b>      | <b>314</b> | <b>157</b> | <b>639</b> |
|          | $\bar{x} = 5,4$ | $\bar{y} = 11$ |            |            |            |



Buch S. 238

**Tab. 71:** Gesamt-, erklärte und nicht-erklärte Abweichung zur Arbeitstabelle 65 (Quelle: Eigene Abbildung).

| Ansatz                                                                              | Gesamtabweichung                                                                                 | = Erklärte Abweichung                                                                                   | + Nicht-erklärte Abweichung                                                              |
|-------------------------------------------------------------------------------------|--------------------------------------------------------------------------------------------------|---------------------------------------------------------------------------------------------------------|------------------------------------------------------------------------------------------|
| Kenngößen                                                                           | Summe der quadrierten Gesamtabweichungen zwischen den Einzelwerten und dem arithmetischen Mittel | Summe der quadrierten Abweichungen zwischen dem prognostizierten Wert und dem arithmetischen Mittelwert | Summe der quadrierten Abweichungen zwischen dem Einzelwert und dem prognostizierten Wert |
| Formel                                                                              | $SS_t = \sum (y_i - \bar{y})^2$                                                                  | $SS_e = \sum (\hat{y} - \bar{y})^2$                                                                     | $SS_{ne} = \sum (y_i - \hat{y})^2$                                                       |
| Beispiel ( $x_1 = 5$ )<br>$y_1 = 8; \bar{y} = 11$<br>$\hat{y} = 2,8 + 1,52x = 10,4$ | Person 1:<br>$SS_{t1} = (8 - 11)^2 = 9$                                                          | Person 1:<br>$SS_{e1} = (10,4 - 11)^2 = 0,36$                                                           | Person 1:<br>$SS_{ne1} = (8 - 10,4)^2 = 5,76$                                            |
| Gesamtwert                                                                          | $SS_t = 34$                                                                                      | $SS_e = 25,8$                                                                                           | $SS_{ne} = 8,2$                                                                          |





Buch S. 238

**Tab. 72:** Berechnung von Freiheitsgraden, mittlerer quadratischer Abweichung und F-Wert (Quelle: Eigene Abbildung).

| Ausgangswert                   | $SS_t = 34$           | $SS_e = 25,8$            | $SS_{ne} = 8,2$          |
|--------------------------------|-----------------------|--------------------------|--------------------------|
| Freiheitsgrad                  | $f(SS_t) = n - 1$     | $f(SS_e) = v - 1$        | $f(SS_{ne}) = n - v$     |
| Berechnung                     | $f(SS_t) = 5 - 1 = 4$ | $f(SS_e) = 2 - 1 = 1$    | $f(SS_{ne}) = 5 - 2 = 3$ |
| Mittlere quadrierte Abweichung |                       | $MS_e = 25,8$            | $MS_{ne} = 2,73$         |
| F-Wert = $MS_e / MS_{ne}$      |                       | $F = 25,8 / 2,73 = 9,44$ |                          |



Buch S. 239

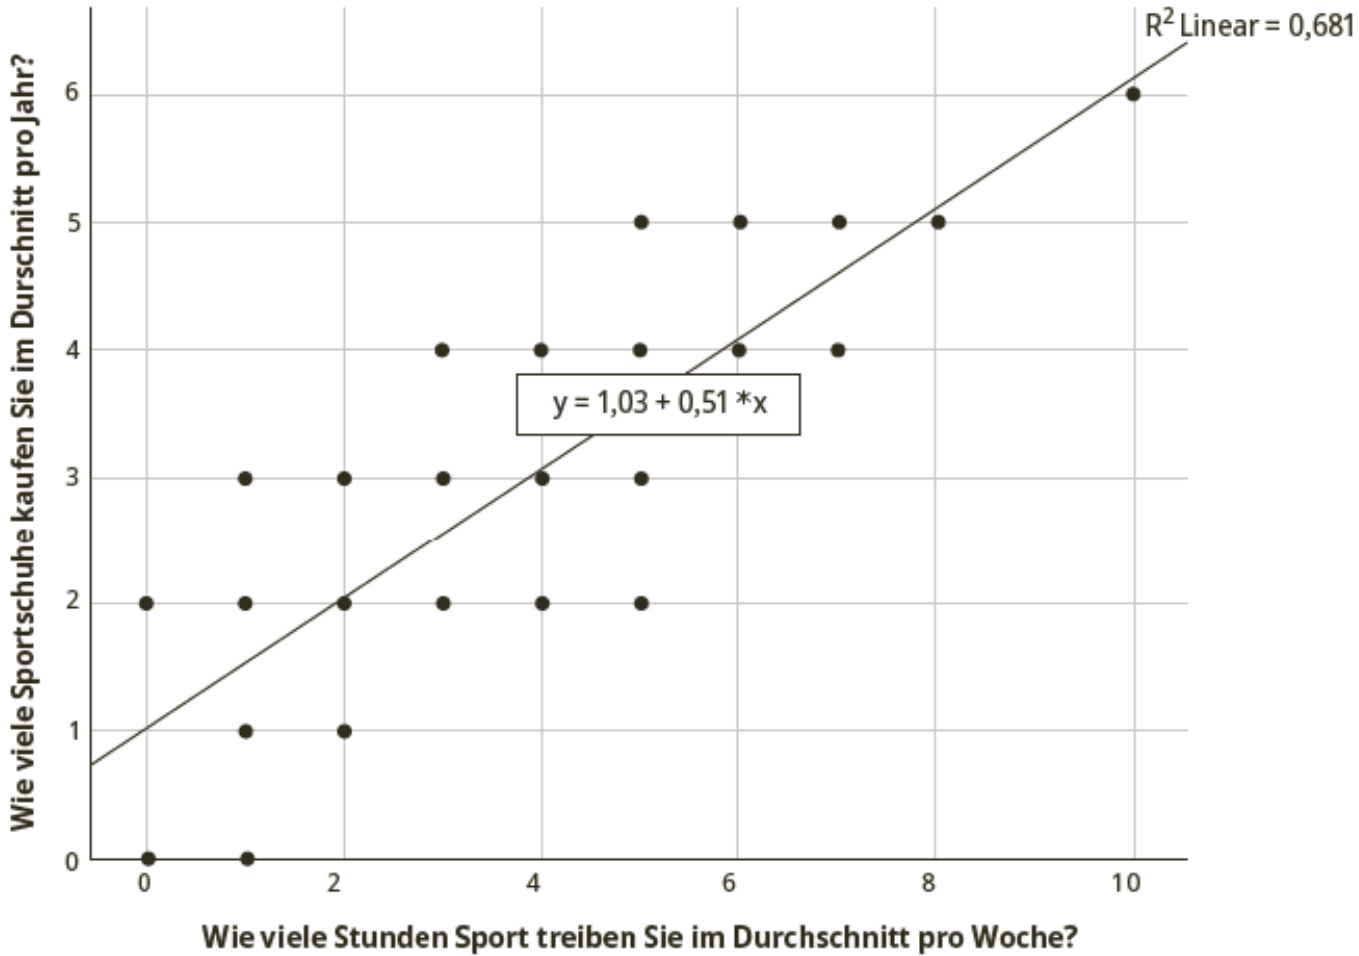

**Abb. 70:** Regressionsfunktion zum Einfluss von Sportaktivitäten auf Sportschuh-Käufe pro Jahr (Quelle: SPSS-Datensatz „Sportschuh Panel“ – Variable 2 und 8).



**Tab. 73:** Ergebnis SPSS-Regressionsanalyse zum Einfluss von Sportaktivitäten auf Kaufvorgänge (Quelle: SPSS-Datensatz „Sportschuh Panel“ – Variable 2 und 8).

| Deskriptive Statistiken                                        |              |            |                     |         |                   |
|----------------------------------------------------------------|--------------|------------|---------------------|---------|-------------------|
|                                                                | N            | Mittelwert | Std.-<br>Abweichung | Minimum | Maximum           |
| Wie viele Stunden Sport treiben Sie im Durchschnitt pro Woche? | 30           | 3,73       | 2,406               | 0       | 10                |
| Wie viele Sportschuhe kaufen Sie im Durchschnitt pro Jahr?     | 30           | 2,93       | 1,484               | 0       | 6                 |
| ANOVA <sup>a</sup>                                             |              |            |                     |         |                   |
| Modell                                                         | Quadratsumme | df         | Mittel der Quadrate | F       | Sig.              |
| Regression                                                     | 43,514       | 1          | 43,514              | 59,864  | ,000 <sup>b</sup> |
| Nicht standardisierte Residuen                                 | 20,353       | 28         | 0,727               |         |                   |
| Gesamt                                                         | 63,867       | 29         |                     |         |                   |

<sup>a</sup>Abhängige Variable: Wie viele Sportschuhe kaufen Sie im Durchschnitt pro Jahr?

<sup>b</sup>Einflussvariablen: (Konstante), Wie viele Stunden Sport treiben Sie im Durchschnitt pro Woche?



Buch S. 243

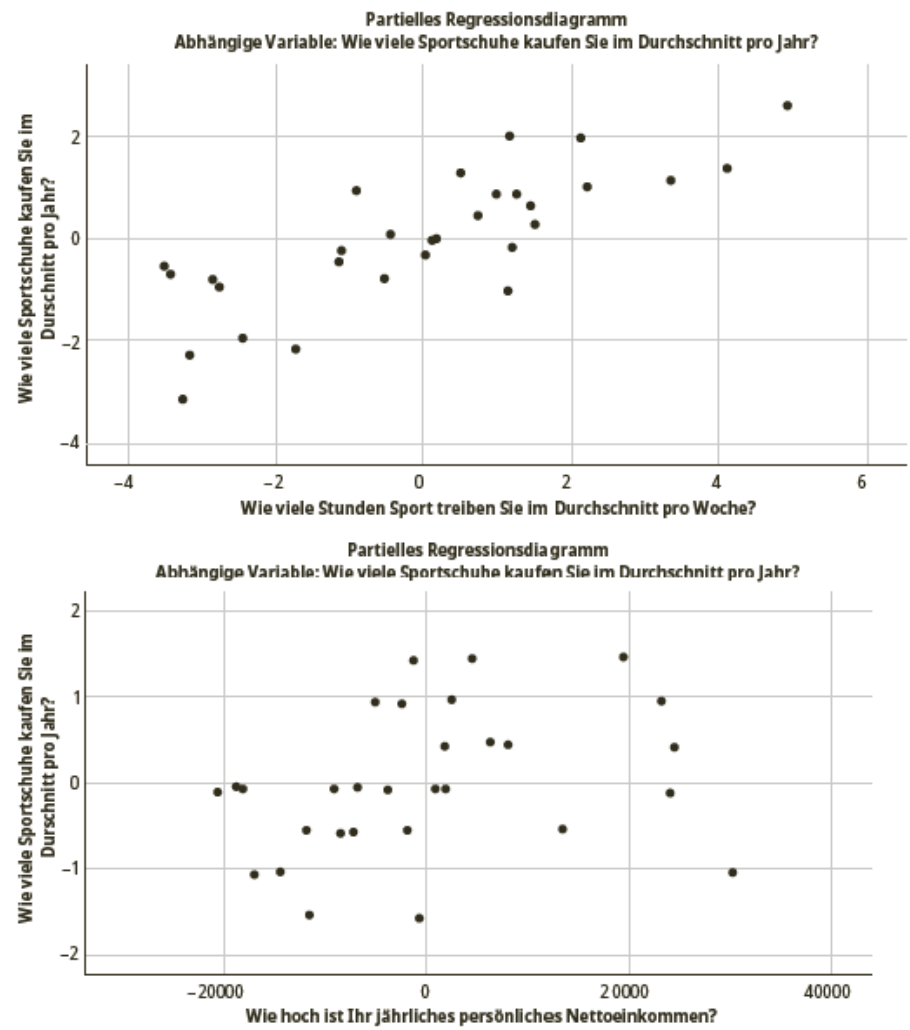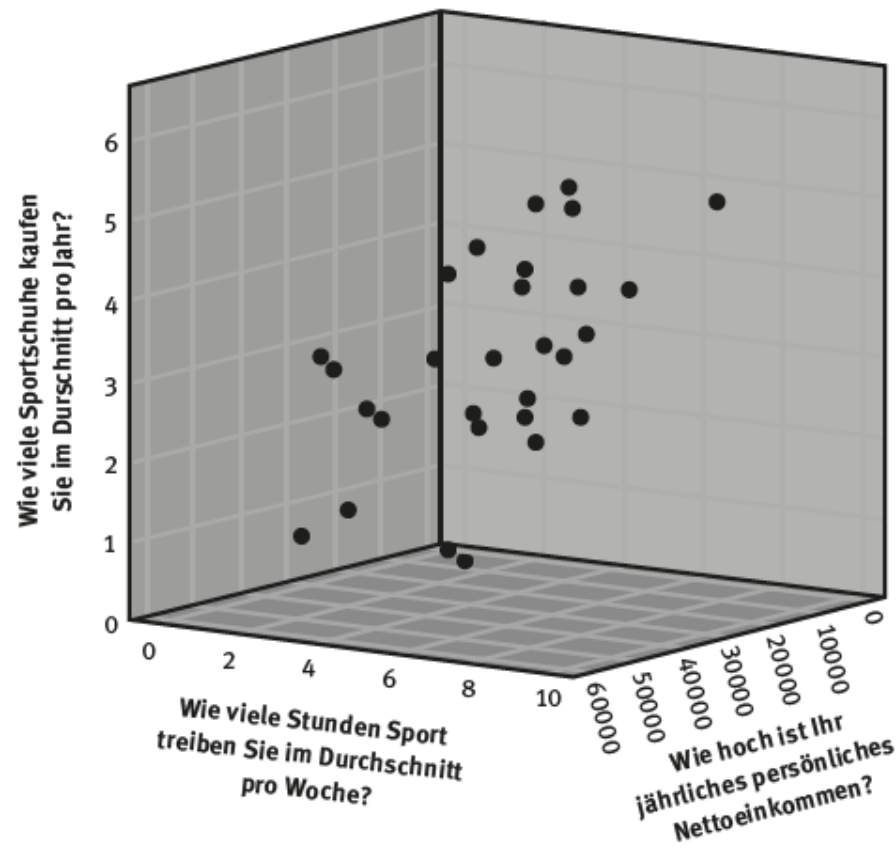

**Abb. 71:** Partielle Regressionsdiagramme zum Einfluss von Einkommen und Sportaktivität auf das Kaufverhalten (Quelle: SPSS-Datensatz „Sportschuh Panel“ – Variable 2, 17 und 8).

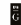

**Tab. 74:** Güte des Regressionsmodells zum Einfluss von Einkommen und Sportaktivität auf das Kaufverhalten (Quelle: SPSS-Datensatz „Sportschuh Panel“ – Variable 2, 17 und 8).

| ANOVA <sup>a</sup> |                                |              |    |                     |        |                   |
|--------------------|--------------------------------|--------------|----|---------------------|--------|-------------------|
| Modell             |                                | Quadratsumme | df | Mittel der Quadrate | F      | Sig.              |
| 1                  | Regression                     | 45,349       | 2  | 22,675              | 33,061 | ,000 <sup>b</sup> |
|                    | Nicht standardisierte Residuen | 18,518       | 27 | 0,686               |        |                   |
|                    | Gesamt                         | 63,867       | 29 |                     |        |                   |

<sup>a</sup>Abhängige Variable: Wie viele Sportschuhe kaufen Sie im Durchschnitt pro Jahr?  
<sup>b</sup>Einflussvariablen: (Konstante), Wie hoch ist Ihr jährliches persönliches Nettoeinkommen?, Wie viele Stunden Sport treiben Sie im Durchschnitt pro Woche?



**Tab. 75:** Koeffizienten des Regressionsmodells zum Einfluss von Einkommen und Sportaktivität auf das Kaufverhalten (Quelle: SPSS-Datensatz „Sportschuh Panel“ – Variable 2, 17 und 8).

| Koeffizienten <sup>a</sup>                                     |                                     |             |                               |       |       |
|----------------------------------------------------------------|-------------------------------------|-------------|-------------------------------|-------|-------|
| Modell                                                         | Nicht standardisierte Koeffizienten |             | Standardisierte Koeffizienten | T     | Sig.  |
|                                                                | Regressionskoeffizient<br><i>B</i>  | Sth.-Fehler | Beta                          |       |       |
| 1 (Konstante)                                                  | 0,768                               | 0,326       |                               | 2,358 | 0,026 |
| Wie viele Stunden Sport treiben Sie im Durchschnitt pro Woche? | 0,470                               | 0,068       | <b>0,762</b>                  | 6,881 | 0,000 |
| Wie hoch ist Ihr jährliches persönliches Nettoeinkommen?       | 1,824 E – 05                        | 0,000       | <b>0,181</b>                  | 1,636 | 0,113 |

<sup>a</sup>Abhängige Variable: Wie viele Sportschuhe kaufen Sie im Durchschnitt pro Jahr?



Buch S. 246

**Tab. 76:** Ordinale Ausprägung von Eigenschaften eines Laufschuhs (Quelle: Eigene Abbildung).

| Eigenschaften | <i>Beispiel: Laufschuh</i> |                       |           |
|---------------|----------------------------|-----------------------|-----------|
| Preis:        | 100 EURO                   | 120 EURO              | 140 EURO  |
| Gewicht:      | 300 Gramm                  |                       | 400 Gramm |
| Außensohle:   | Abriebfestes Karbongummi   | Normale Gummimischung |           |



Buch S. 247

**Tab. 77:** Exemplarische Laufschuh-Rangwertmatrix im Rahmen von Conjoint Measurement (Quelle: Eigene Abbildung).

| Preis (A)    | Gewicht (B)   |               |
|--------------|---------------|---------------|
|              | 1 = 300 Gramm | 2 = 400 Gramm |
| 1 = 100 EURO | Score 6       | Score 5       |
| 2 = 120 EURO | Score 4       | Score 3       |
| 3 = 140 EURO | Score 2       | Score 1       |





Buch S. 248

**Tab. 78:** Berechnung von Teilnutzenwerten im Rahmen von Conjoint Measurement (Quelle: Eigene Abbildung).

| Preis (A)                       | Gewicht (B)   |               | $\overline{P_A}$ | $\overline{P_A} - \overline{P}$ |
|---------------------------------|---------------|---------------|------------------|---------------------------------|
|                                 | 1 = 300 Gramm | 2 = 400 Gramm |                  |                                 |
| 1 = 100 EURO                    | 6             | 5             | 5,5              | 2                               |
| 2 = 120 EURO                    | 4             | 3             | 3,5              | 0                               |
| 3 = 140 EURO                    | 2             | 1             | 1,5              | -2                              |
| $\overline{P_B}$                | 4             | 3             | 3,5              |                                 |
| $\overline{P_B} - \overline{P}$ | 0,5           | -0,5          |                  |                                 |



Buch S. 249

**Tab. 79:** Berechnung von normierten Teilnutzenwerten im Rahmen von Conjoint Measurement (Quelle: Eigene Abbildung).

|                                    | $\overline{P_{A/B}} - \overline{P}$ | transformierter Teilnutzen | normierter Teilnutzen |
|------------------------------------|-------------------------------------|----------------------------|-----------------------|
| Preis A <sub>1</sub> = 100 EURO    | 2                                   | 2 – (–2) = 4               | 4/5 = 0,8             |
| Preis A <sub>2</sub> = 120 EURO    | 0                                   | 0 – (–2) = 2               | 2/5 = 0,4             |
| Preis A <sub>3</sub> = 140 EURO    | –2                                  | –2 – (–2) = 0              | 0/5 = 0               |
| Gewicht B <sub>1</sub> = 300 Gramm | 0,5                                 | 0,5 – (–0,5) = 1           | 1/5 = 0,2             |
| Gewicht B <sub>2</sub> = 400 Gramm | –0,5                                | –0,5 – (–0,5) = 0          | 0/5 = 0               |



Buch S. 250

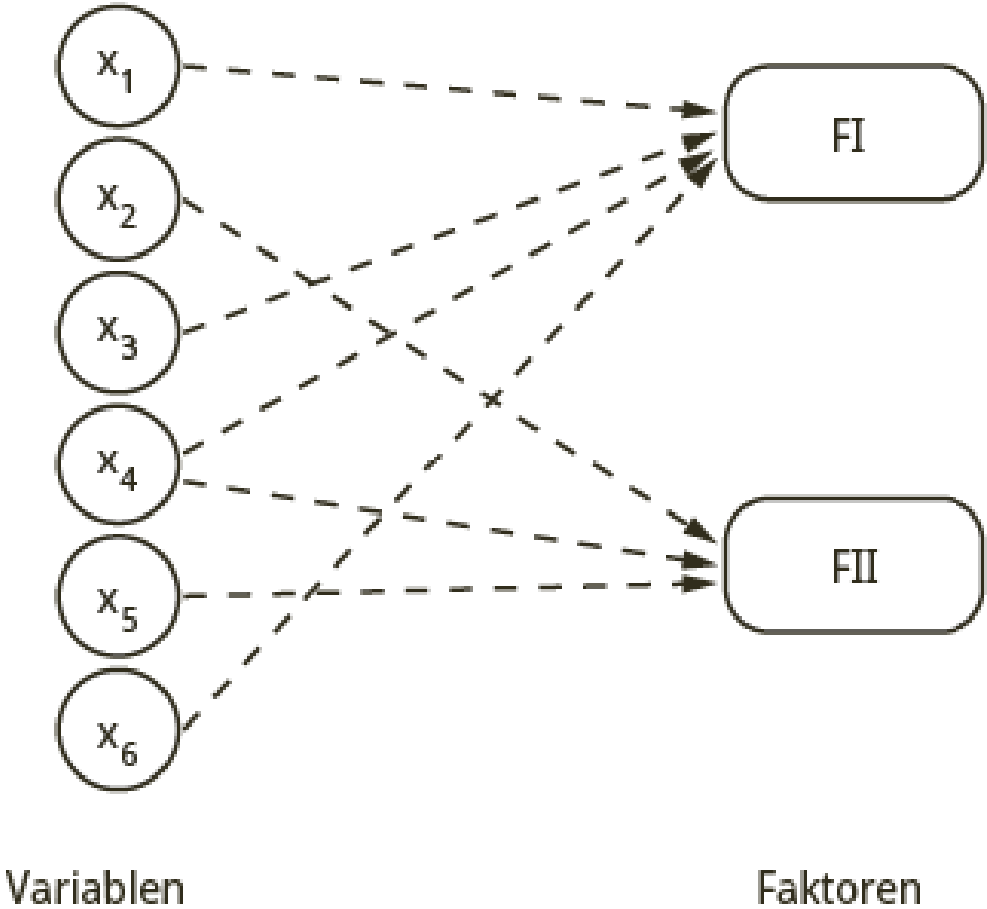

**Abb. 72:** Exemplarische Darstellung für die Konzentration von sechs Variablen auf zwei Faktoren (Quelle: Eigene Darstellung).



Buch S. 251

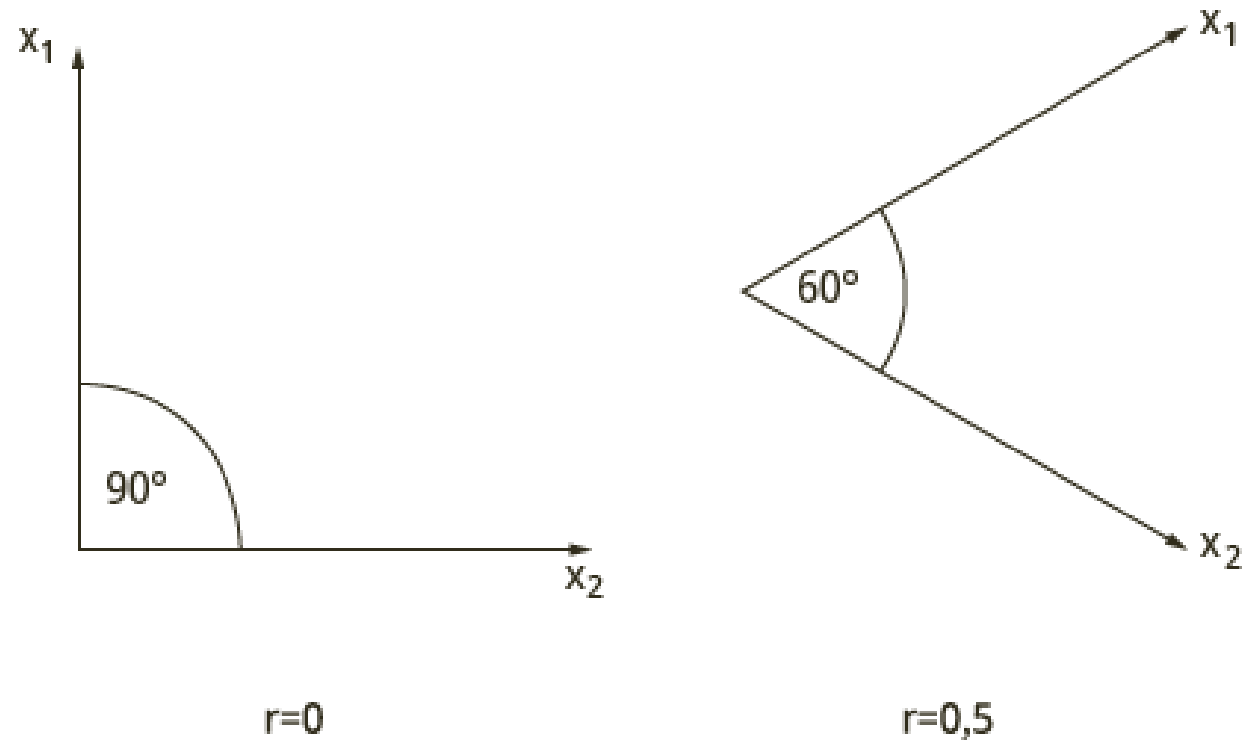

**Abb. 73:** Grafische Darstellung von Korrelationskoeffizienten mit  $r = 0$  und  $r = 0,5$   
(Quelle: Eigene Darstellung).



Buch S. 251

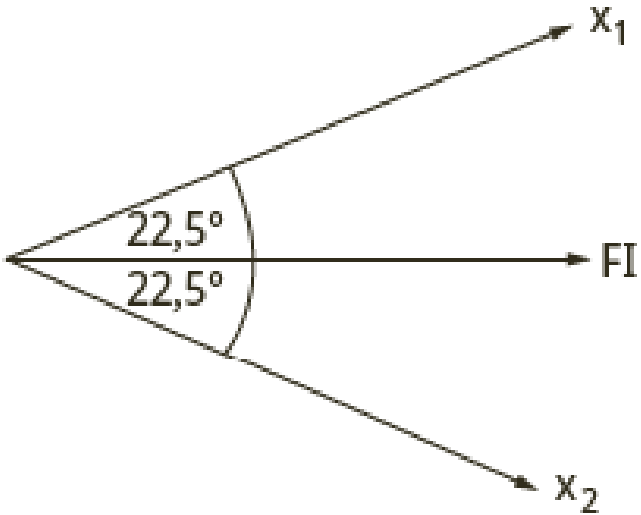

**Abb. 74:** Grafische Darstellung der Faktorladung von zwei Variablen bei einem Winkel von  $22,5^\circ$  (Quelle: Eigene Darstellung).



Buch S. 252

**Tab. 80:** Bedeutung unterschiedlicher Parameter beim Sportschuhkauf (n = 30) (Quelle: SPSS-Datensatz „Sportschuh Panel“ – Variable 4,5,6 und 7).

|          | Unwichtig (1) | Eher<br>wichtig (2) | Durchschnittlich<br>wichtig (3) | Eher<br>wichtig (4) | Wichtig (5) |
|----------|---------------|---------------------|---------------------------------|---------------------|-------------|
| Preis    | 3             | 3                   | 3                               | 13                  | 8           |
| Design   | 2             | 4                   | 3                               | 15                  | 6           |
| Material | 3             | 3                   | 3                               | 11                  | 10          |
| Dämpfung | 3             | 4                   | 3                               | 12                  | 8           |



Buch S. 252

**Tab. 81:** Korrelationsmatrix unterschiedlicher Parameter beim Sportschuhkauf (n = 30) (Quelle: SPSS-Datensatz „Sportschuh Panel“ – Variable 4,5,6 und 7).

| Korrelationen                             |                                           | Wie wichtig ist<br>Ihnen der<br>Preis? | Wie wichtig ist<br>Ihnen das<br>Design? | Wie wichtig ist<br>Ihnen das<br>Material? | Wie wichtig ist<br>Ihnen die<br>Dämpfung? |
|-------------------------------------------|-------------------------------------------|----------------------------------------|-----------------------------------------|-------------------------------------------|-------------------------------------------|
| Wie wichtig ist<br>Ihnen der Preis?       | Korrelation                               | 1                                      | −0,180                                  | −0,283                                    | −0,334                                    |
|                                           | nach Pearson<br>Signifikanz<br>(2-seitig) |                                        | 0,342                                   | 0,129                                     | 0,071                                     |
| Wie wichtig ist<br>Ihnen das<br>Design?   | Korrelation                               | −0,180                                 | 1                                       | ,796*                                     | ,836*                                     |
|                                           | nach Pearson<br>Signifikanz<br>(2-seitig) | 0,342                                  |                                         | 0,000                                     | 0,000                                     |
| Wie wichtig ist<br>Ihnen das<br>Material? | Korrelation                               | −0,283                                 | ,796*                                   | 1                                         | ,884*                                     |
|                                           | nach Pearson<br>Signifikanz<br>(2-seitig) | 0,129                                  | 0,000                                   |                                           | 0,000                                     |
| Wie wichtig ist<br>Ihnen die<br>Dämpfung? | Korrelation                               | −0,334                                 | ,836*                                   | ,884*                                     | 1                                         |
|                                           | nach Pearson<br>Signifikanz<br>(2-seitig) | 0,071                                  | 0,000                                   | 0,000                                     |                                           |

\*Die Korrelation ist auf dem Niveau von 0,01 (2-seitig) signifikant.



Buch S. 254

Erklärte Gesamtvarianz

| Komponente | Summen von quadrierten Faktorladungen für Extraktion |               |              |
|------------|------------------------------------------------------|---------------|--------------|
|            | Gesamt                                               | % der Varianz | Kumulierte % |
| 1          | 2,797                                                | 69,914        | 69,914       |
| 2          | ,896                                                 | 22,394        | 92,308       |
| 3          | ,202                                                 | 5,048         | 97,356       |
| 4          | ,106                                                 | 2,644         | 100,000      |

Extraktionsmethode: Hauptkomponentenanalyse.

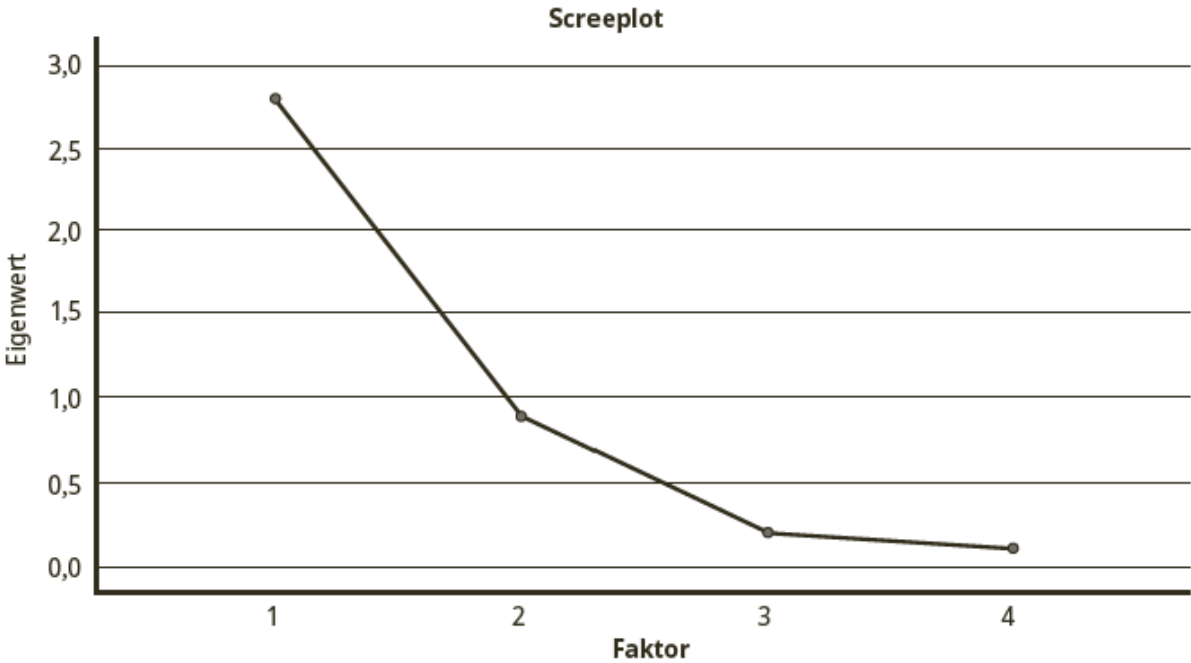

**Abb. 75:** Erklärte Gesamtvarianz und Screeplot zu Eigenwert-Anteilen von Faktorlösungen (Quelle: SPSS-Datensatz „Sportschuh Panel“ – Variable 4,5,6 und 7).





Buch S. 255

**Tab. 82:** Erklärte Gesamtvarianz und Screeplot zu Eigenwert-Anteilen von Faktorlösungen (Quelle: SPSS-Datensatz „Sportschuh Panel“ – Variable 4,5,6 und 7).

|                                                      | Faktor (Komponente) |        |
|------------------------------------------------------|---------------------|--------|
|                                                      | 1                   | 2      |
| Wie wichtig ist Ihnen der Preis bei Sportschuhen?    | –0,137              | 0,989  |
| Wie wichtig ist Ihnen das Design bei Sportschuhen?   | 0,935               | –0,032 |
| Wie wichtig ist Ihnen das Material bei Sportschuhen? | 0,930               | –0,168 |
| Wie wichtig ist Ihnen die Dämpfung bei Sportschuhen? | 0,938               | –0,218 |

Extraktionsmethode: Hauptkomponentenanalyse.

Rotationsmethode: Varimax mit Kaiser-Normalisierung.



Buch S. 255

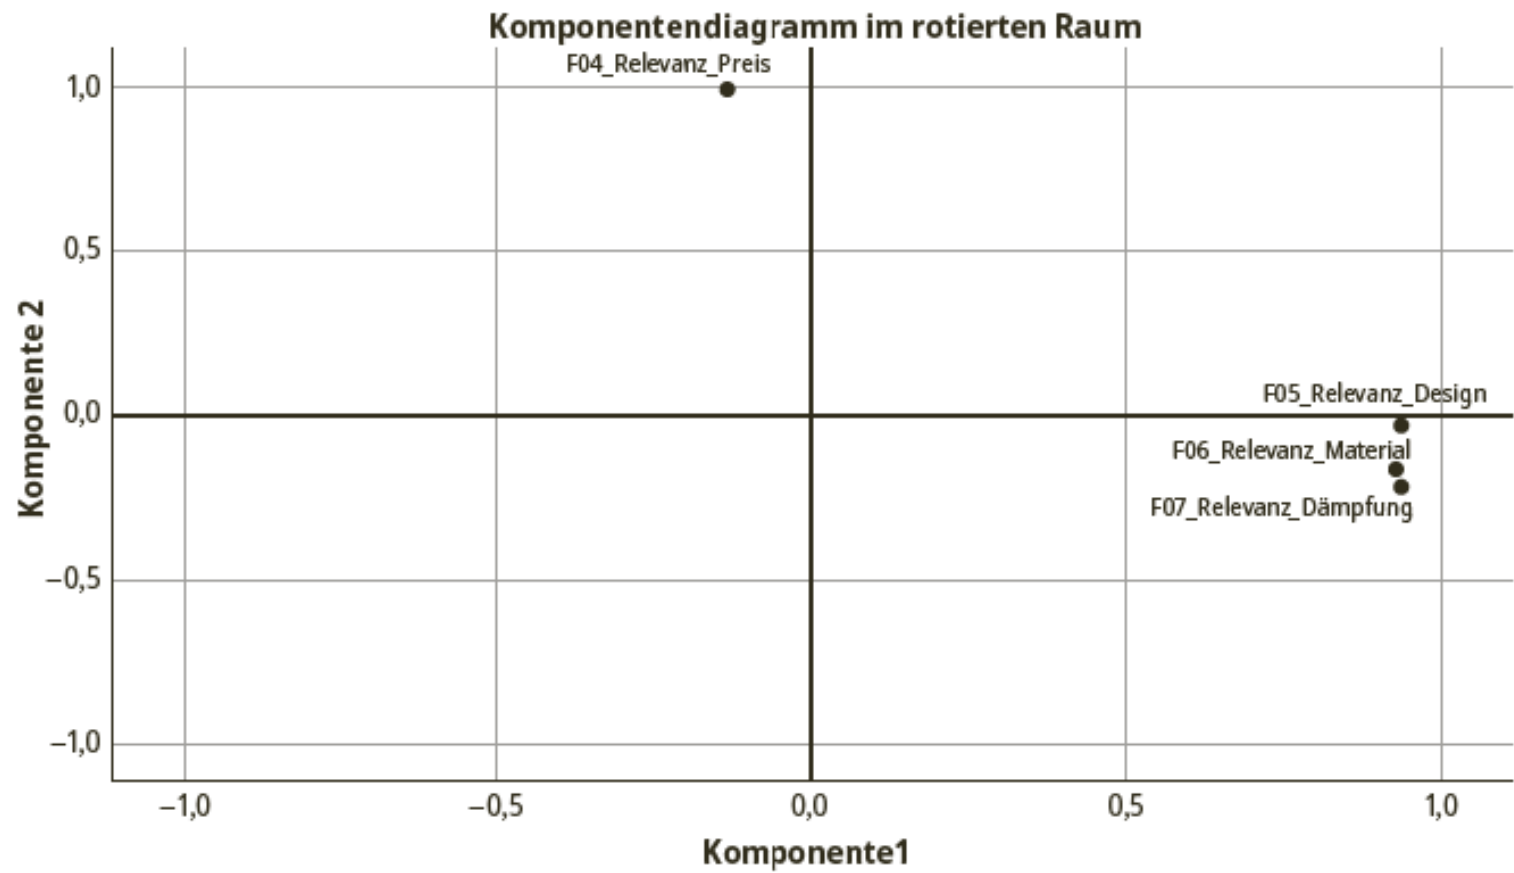

**Abb. 76:** Komponentendiagramm zur Visualisierung der rotierten Faktorenanalyse (Quelle: SPSS-Datensatz „Sportschuh Panel“ – Variable 4,5,6 und 7).



Buch S. 256

**Tab. 83:** Proximitätsmatrix zur Ermittlung der Ähnlichkeit bzw. Distanz von Personen (Quelle: Eigene Abbildung).

|                 | Person 1              | Person 2              | Person <i>n</i>       |
|-----------------|-----------------------|-----------------------|-----------------------|
| Person 1        | X                     | Proximität 12         | Proximität 1 <i>n</i> |
| Person 2        | Proximität 21         | X                     | Proximität 2 <i>n</i> |
| Person <i>n</i> | Proximität <i>n</i> 1 | Proximität <i>n</i> 2 | X                     |



Buch S. 257

**Tab. 84:** Kombinationsmöglichkeiten von binären Variablen (Quelle: Backhaus et al. 2016, S. 441).

| Person 1                        | Person 2                     |                                    | Zeilensumme |
|---------------------------------|------------------------------|------------------------------------|-------------|
|                                 | Eigenschaft<br>vorhanden (1) | Eigenschaft nicht<br>vorhanden (0) |             |
| Eigenschaft vorhanden (1)       | $a$                          | $c$                                | $a + c$     |
| Eigenschaft nicht vorhanden (0) | $b$                          | $d$                                | $b + d$     |
| Spaltensumme                    | $a + b$                      | $c + d$                            | $m$         |



**Tab. 85:** Ermittlung einer Proximitätsmatrix anhand von euklidischen Distanzwerten (Quelle: SPSS-Datensatz „Sportschuh Panel“ – Variable 4,5,6 und 7).

| Ausgangsdaten: Präferenzwerte von 1 (unwichtig) bis 5 (wichtig) |                |                 |                   |                   |   |
|-----------------------------------------------------------------|----------------|-----------------|-------------------|-------------------|---|
|                                                                 | Relevanz Preis | Relevanz Design | Relevanz Material | Relevanz Dämpfung |   |
| Person 1                                                        | 4              | 1               | 1                 |                   | 1 |
| Person 2                                                        | 5              | 1               | 3                 |                   | 3 |
| Person 3                                                        | 5              | 1               | 3                 |                   | 3 |
| Person 4                                                        | 5              | 4               | 4                 |                   | 3 |
| Person 5                                                        | 4              | 4               | 4                 |                   | 4 |

| Euklidische Distanzwerte |          |          |          |          |          |
|--------------------------|----------|----------|----------|----------|----------|
|                          | Person 1 | Person 2 | Person 3 | Person 4 | Person 5 |
| Person 1                 | X        | 3        | 3        | 4,8      | 5,2      |
| Person 2                 | 3        | X        | 0        | 3,2      | 3,5      |
| Person 3                 | 3        | 0        | X        | 3,2      | 3,5      |
| Person 4                 | 4,8      | 3,2      | 3,2      | X        | 1,4      |
| Person 5                 | 5,2      | 3,5      | 3,5      | 1,4      | X        |



Buch S. 261

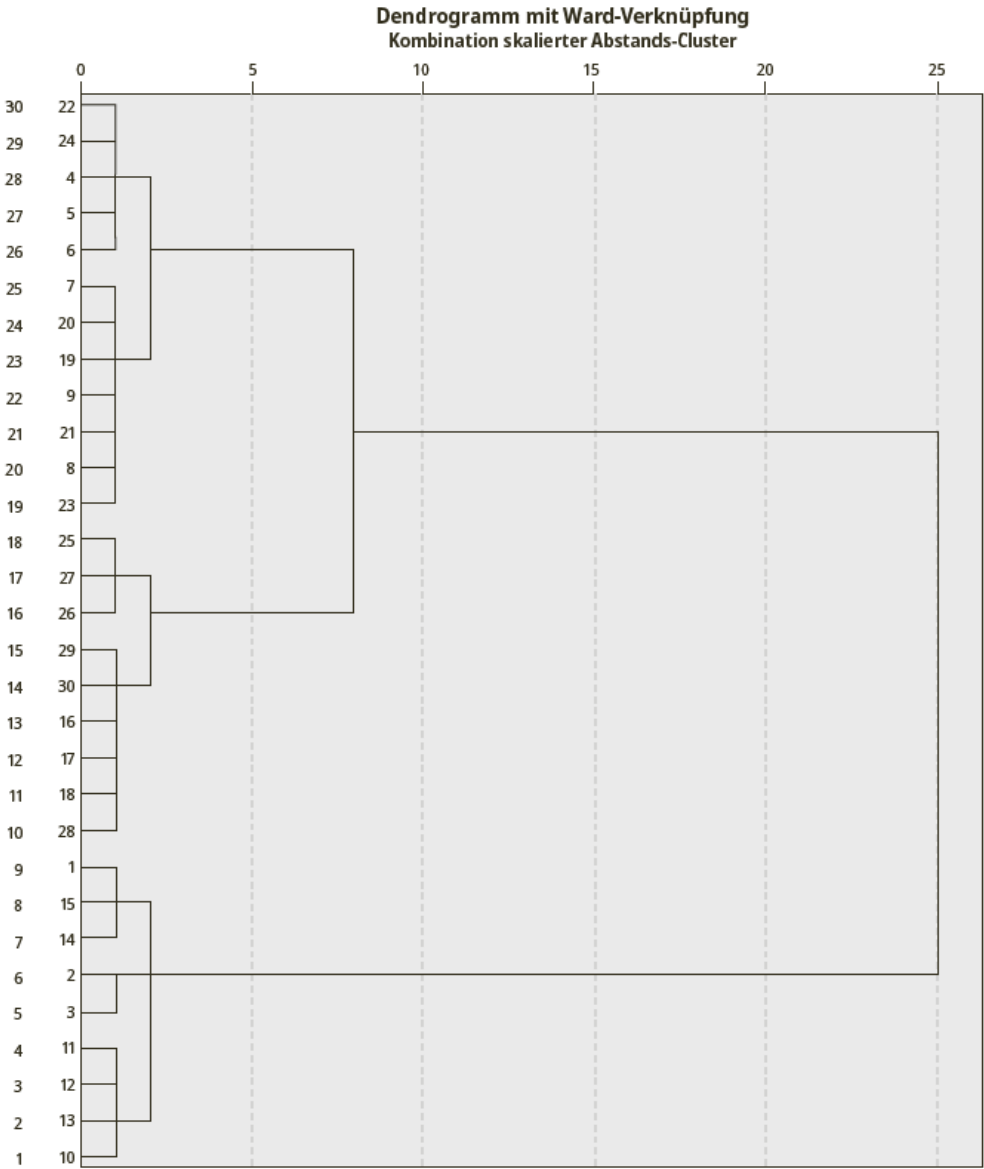

**Abb. 77:** Dendrogramm als Ergebnis einer hierarchischen Cluster-Analyse mit Ward-Verknüpfung (Quelle: SPSS-Datensatz „Sportschuh Panel“ – Variable 4,5,6 und 7).



Buch S. 262

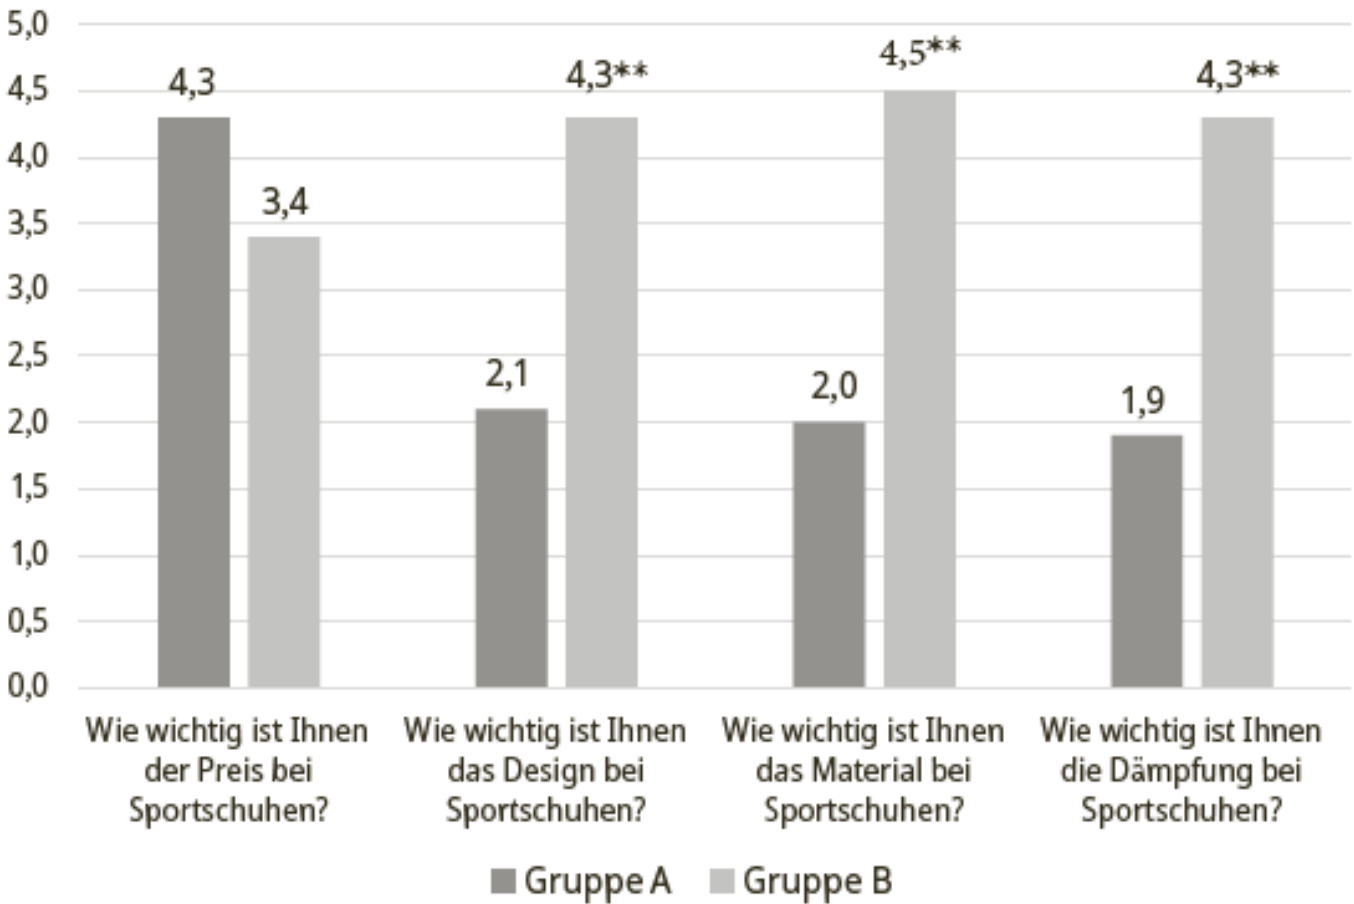

**Abb. 78:** Mittelwertvergleich der durch die Clusteranalyse gebildeten Gruppen A und B (Quelle: SPSS-Datensatz „Sportschuh Panel“ – Variable 4,5,6 und 7).



Buch S. 264

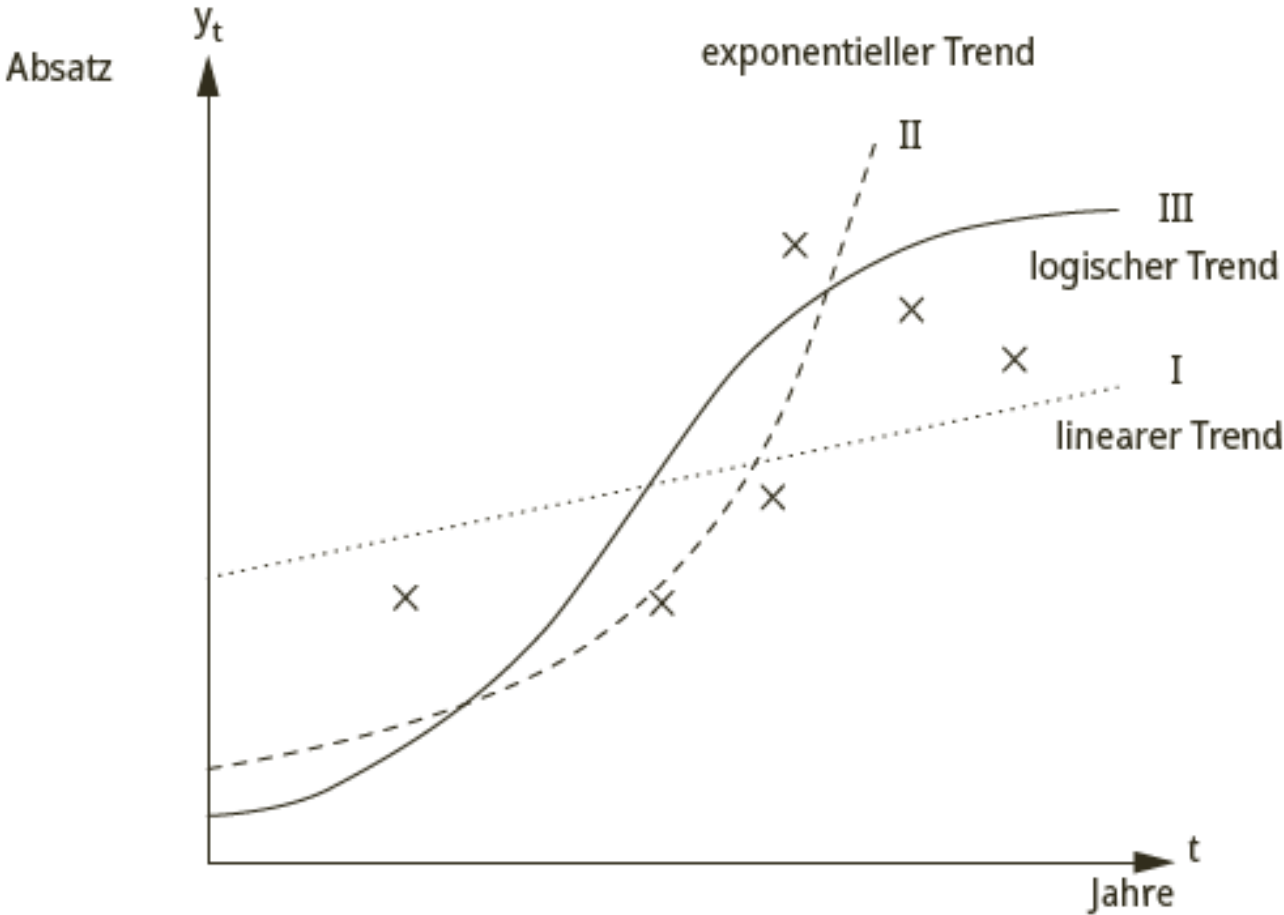

**Abb. 79:** Grundformen von Trendfunktionen (Quelle: Meffert et. al. 2024, S. 178).





Buch S. 265

**Tab. 86:** Ermittlung der Trendfunktion aus fünf Periodenwerten über eine Trendextrapolation (Quelle: Eigene Abbildung).

| Periode (= $t$ ) | Absatz (= $y$ )     | $t \cdot y$     | $t^2$       |
|------------------|---------------------|-----------------|-------------|
| 1                | 3.458               | 3.458           | 1           |
| 2                | 3.743               | 7.486           | 4           |
| 3                | 3.556               | 10.668          | 9           |
| 4                | 3.810               | 15.240          | 16          |
| 5                | 3.952               | 19.760          | 25          |
| $\sum = 15$      | $\sum = 18.519$     | $\sum = 56.612$ | $\sum = 55$ |
| $\bar{t} = 3$    | $\bar{y} = 3.703,8$ |                 |             |



**Tab. 87:** Vergleich von realen und über eine Trendextrapolation geschätzten Absatzwerte ( $t = 5$ ) (Quelle: Eigene Abbildung).

| Periode (= $t$ ) | Absatz (= $y$ ) IST | $t \cdot y$                    | $t^2$       | Absatz (= $\hat{y}$ ) prog. |
|------------------|---------------------|--------------------------------|-------------|-----------------------------|
| 1                | 3.458               | 3.458                          | 1           | 3.492,8                     |
| 2                | 3.743               | 7.486                          | 4           | 3.598,3                     |
| 3                | 3.556               | 10.668                         | 9           | 3.703,8                     |
| 4                | 3.810               | 15.240                         | 16          | 3.809,3                     |
| 5                | 3.952               | 19.760                         | 25          | 3.914,8                     |
| $\sum = 15$      | $\sum = 18.519$     | $\sum = 56.612$                | $\sum = 55$ |                             |
| $\bar{t} = 3$    |                     | $\hat{y}_t = 3.387,3 + 105,5t$ |             |                             |



Buch S. 267

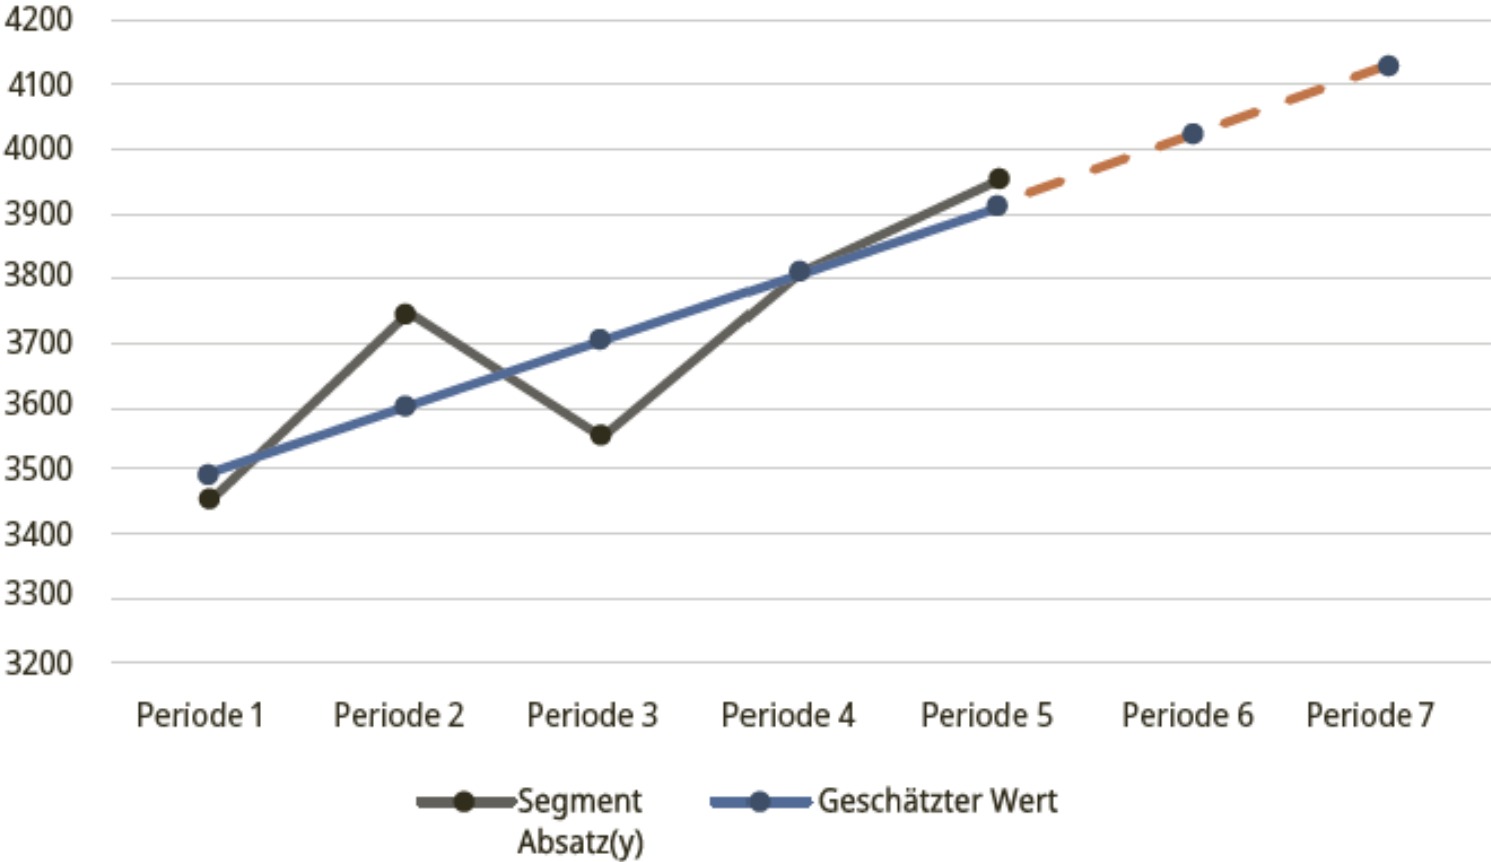

**Abb. 80:** Visualisierung der extrapolierten Trendfunktion auf Basis von Vergangenheitswerten (Quelle: Eigene Abbildung).



Buch S. 268

**Tab. 88:** Ermittlung einer Prognose aus fünf Periodenwerten über gleitende 3er-Durchschnitte (Quelle: Eigene Abbildung).

| Periode (= $t$ ) | Absatz (= $y$ ) | gleitende 3er $\Sigma$ | gleitender 3er $\bar{y}$ | Prognose P6    |
|------------------|-----------------|------------------------|--------------------------|----------------|
| 1                | 3.458           |                        |                          |                |
| 2                | 3.743           | 10.757                 | 3.585,7                  |                |
| 3                | 3.556           | 11.109                 | <b>3.703,0</b>           |                |
| 4                | 3.810           | 11.318                 | <b>3.772,7</b>           |                |
| 5                | <b>3.952</b>    |                        |                          |                |
| (6)              |                 |                        |                          | <b>3.809,2</b> |

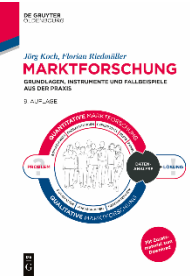

Buch S. 268

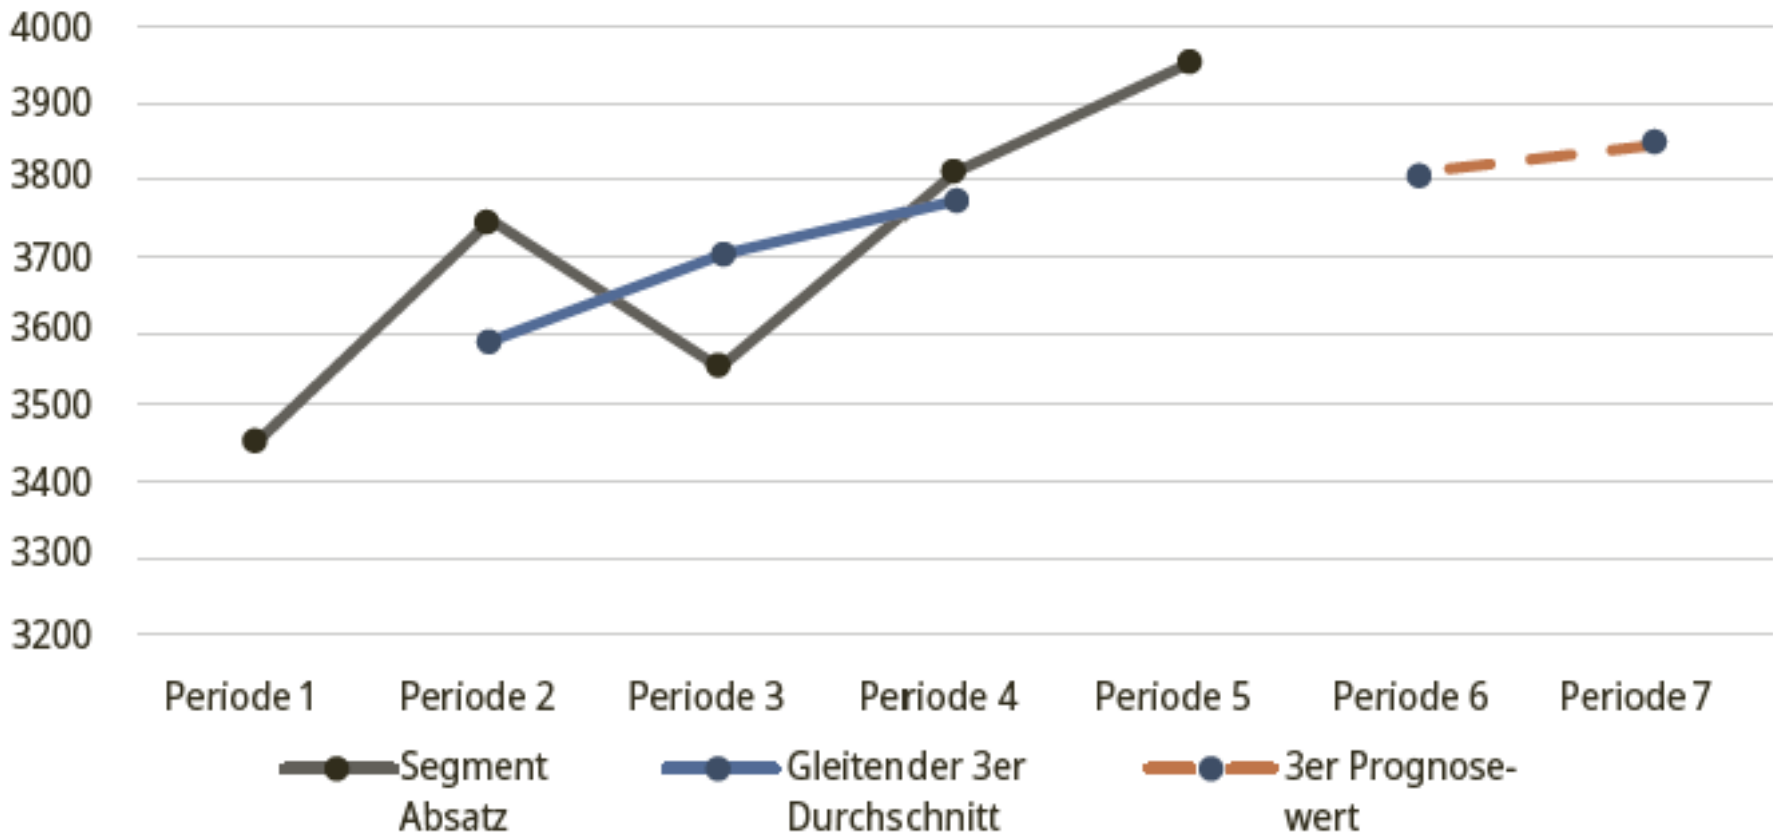

**Abb. 81:** Visualisierung der Prognosewerte bei Anwendung eines gleitenden 3er-Durchschnitts (Quelle: Eigene Abbildung).



Buch S. 270

**Tab. 89:** Ermittlung einer Prognose aus fünf Periodenwerten über exponentielle Glättung ( $\alpha = 0,7$ ) (Quelle: Eigene Abbildung).

| Periode (= $t$ ) | Absatz (= $y$ ) | Geglätteter Wert | Prognose P6    |
|------------------|-----------------|------------------|----------------|
| 1                | 3.458           |                  |                |
| 2                | 3.743           |                  |                |
| 3                | 3.556           | 3.657,5          |                |
| 4                | 3.810           | 3.586,5          |                |
| 5                | <b>3.952</b>    | <b>3.742,9</b>   |                |
| (6)              |                 |                  | <b>3.889,3</b> |



Buch S. 270

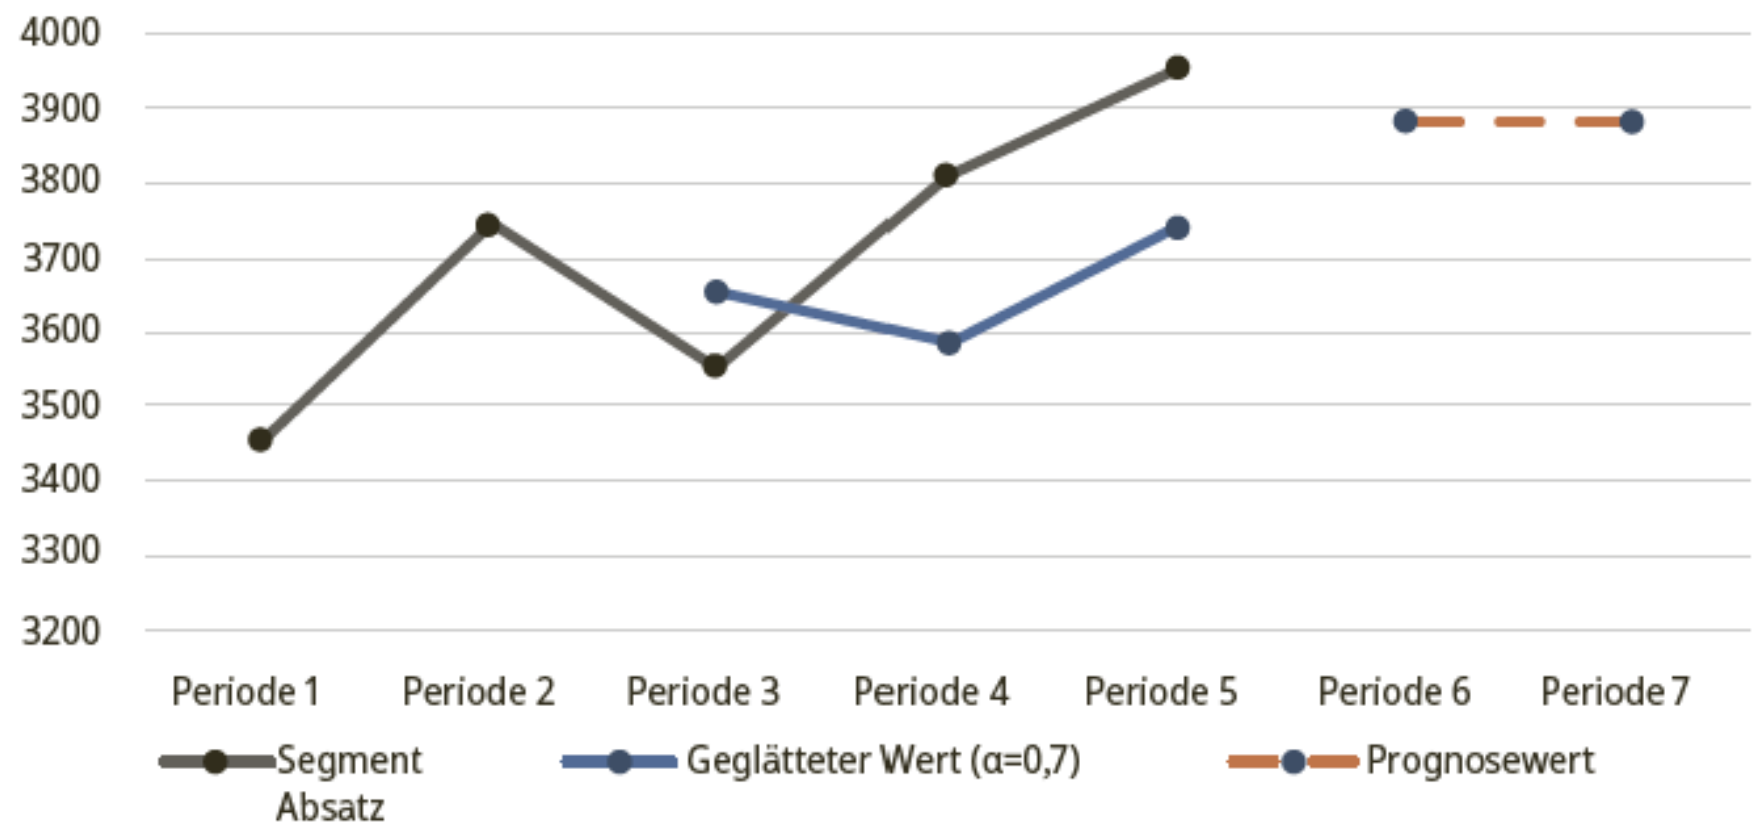

**Abb. 82:** Visualisierung der Prognosewerte bei Anwendung der exponentiellen Glättung ( $\alpha = 0,7$ ) (Quelle: Eigene Abbildung).



Buch S. 272

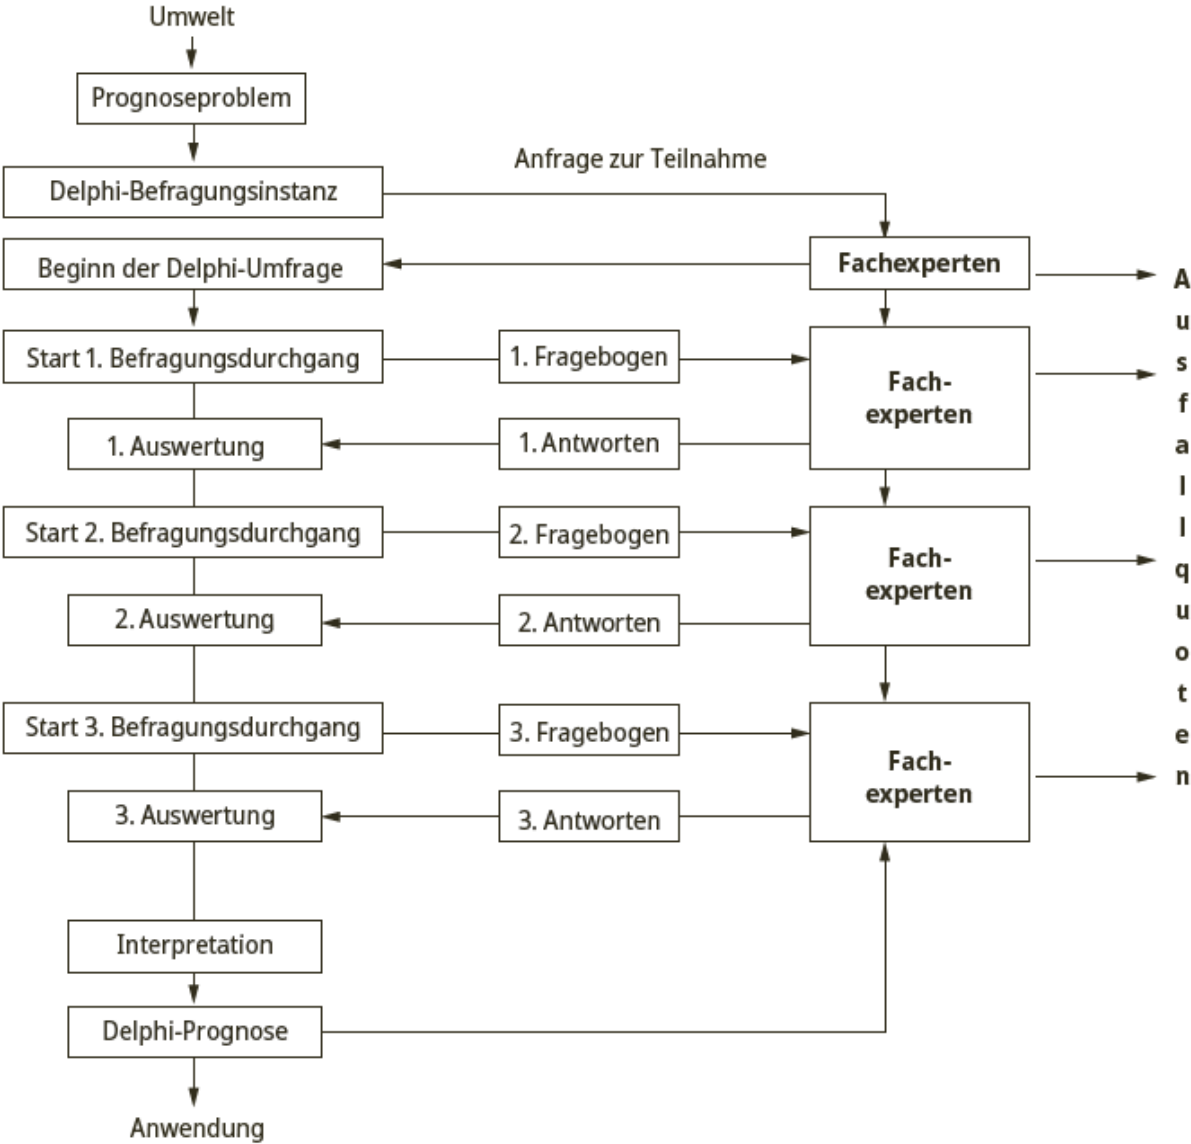

Abb. 83: Ablaufschema einer Delphi-Umfrage (Quelle: Fantapié-Altobelli/Hoffmann 2011, S. 289).





Buch S. 274

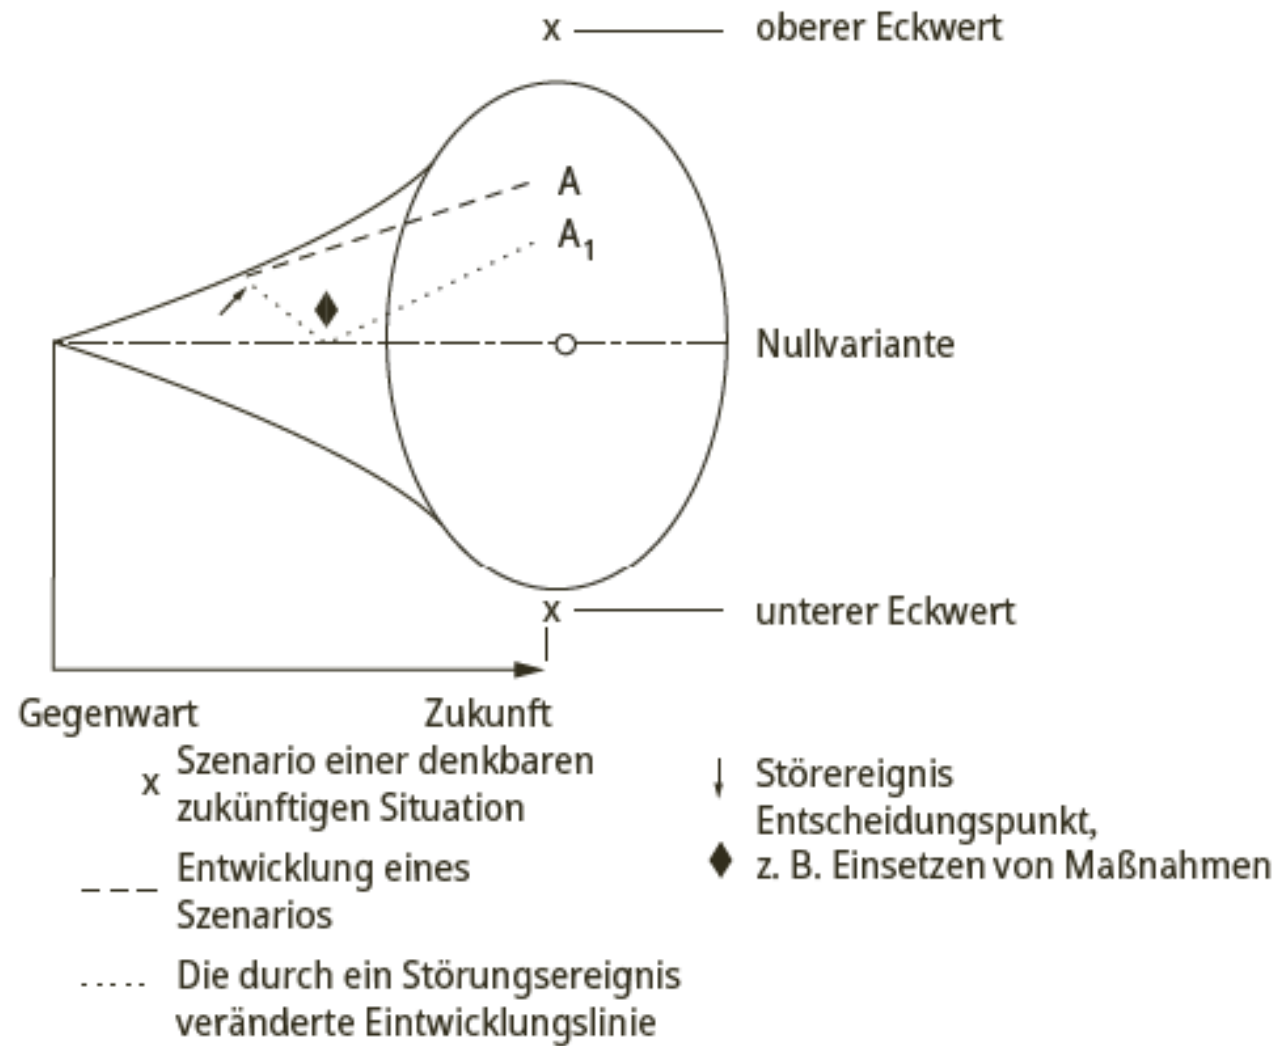

**Abb. 84:** Der Szenario-Trichter (Quelle: Berekoven/Eckert/Ellenrieder 2009, S. 252).



Buch S. 277

*Umfang an  
Informationen*

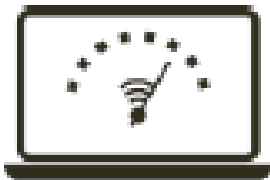

Dashboard-Lösung

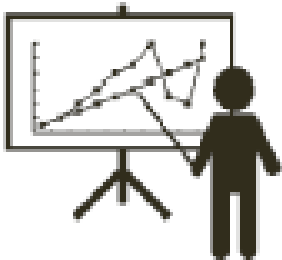

PPT-Präsentation

*Verständlichkeit  
der Informationen*

**Abb. 85:** Einordnung von Dashboard-Lösungen und PPT-Präsentationen bezüglich Umfang und Verständlichkeit (Quelle: Eigene Abbildung).



Buch S. 278

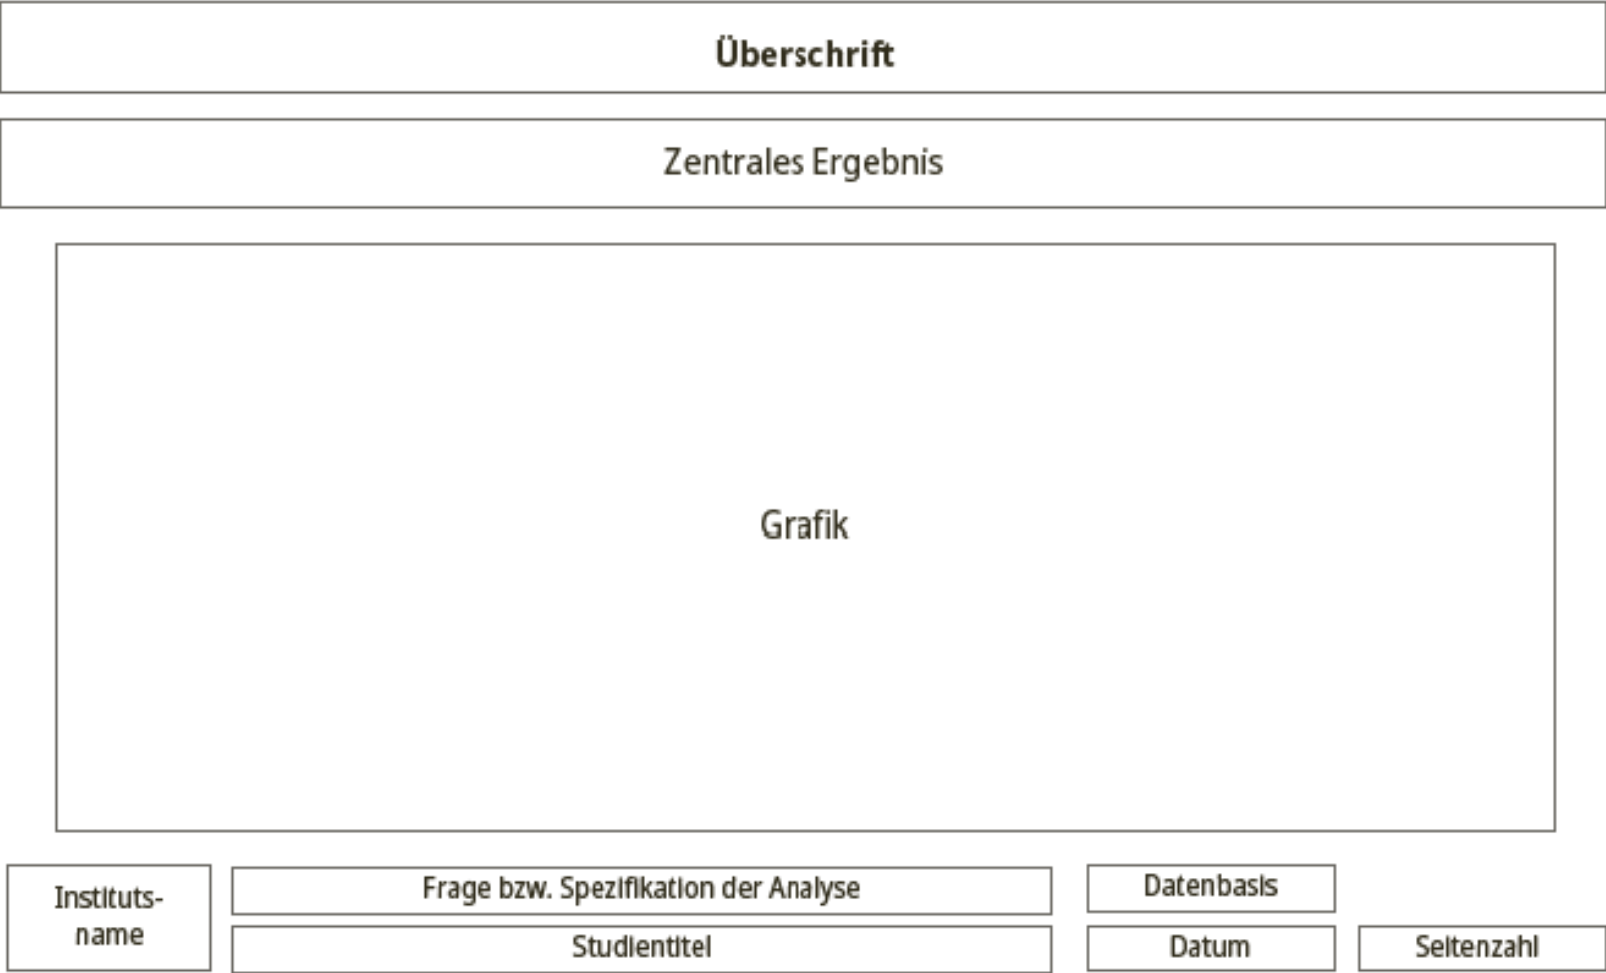

**Abb. 86:** Gestaltung aussagekräftiger Marktforschungs-Charts (Quelle: Ottawa/Rietz 2015, S. 213).



Buch S. 279

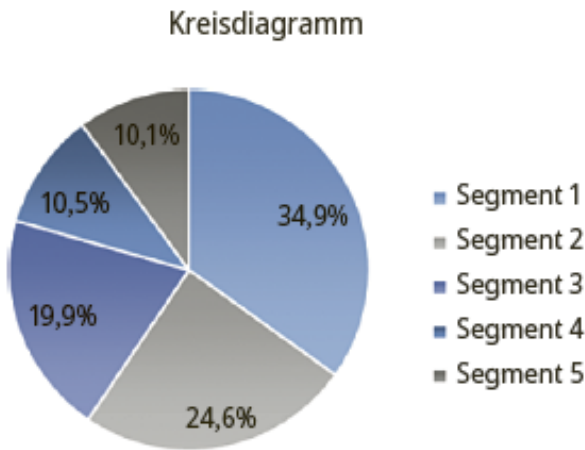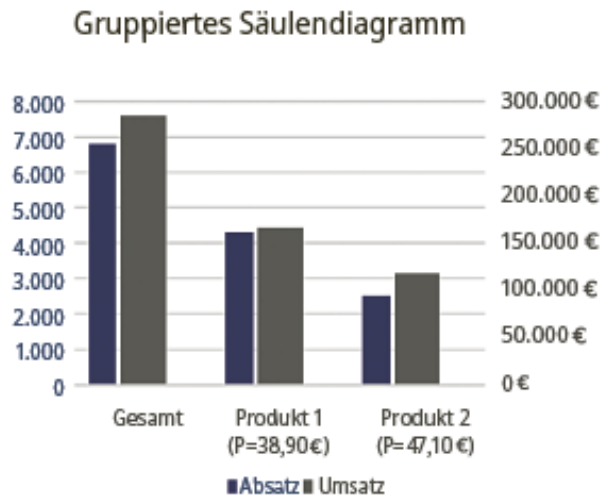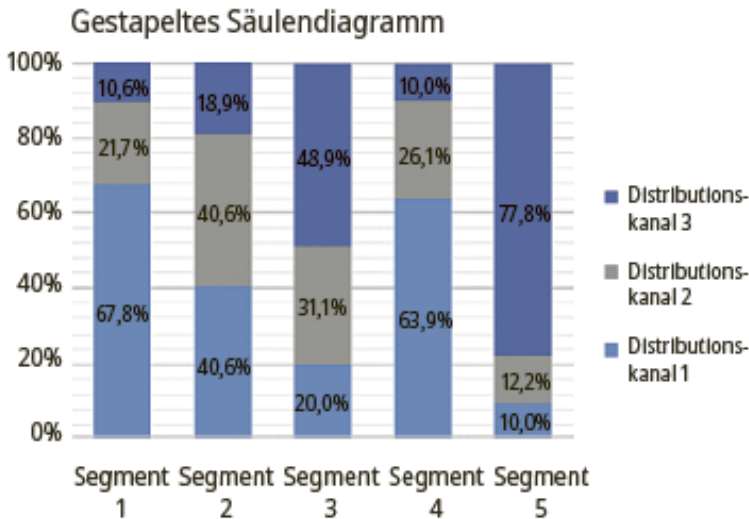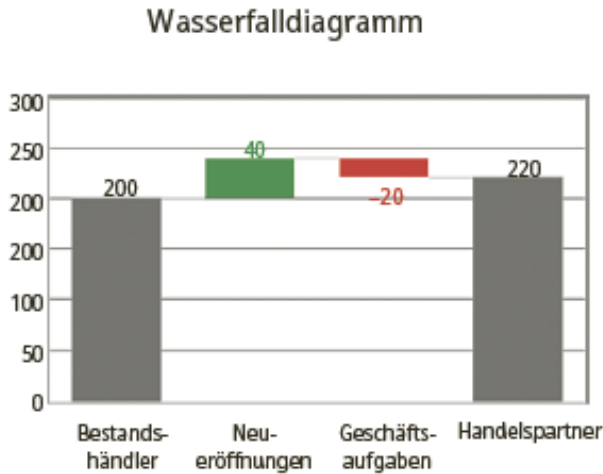

Abb. 87: Beispiele für klassische Marktforschungs-Diagramme (Quelle: Eigene Abbildung).
